# Supplementary material for: Design and synthesis of new bis(1,2,4-triazolo[3,4-b][1,3,4]thiadiazines) and bis((quinoxalin-2-yl)phenoxy)alkanes as anti-breast cancer agents through dual PARP-1 and EGFR targets inhibition
Source: Royal Society of Chemistry journal article supplement (doi:10.1039/d2ra03549a), 2022-01-01
Supplement: d2ra03549a1.pdf [file d2ra03549a1.pdf]

## Design and synthesis of new bis(1,2,4-triazolo[3,4-b][1,3,4]thiadiazines) and bis(quinoxalin-2-yl)phenoxy)alkanes as anti-breast cancer agents through dual inhibitory activity of PARP-1 and EGFR

Fatma M. Thabet,<sup>1</sup> Kamal M. Dawood,<sup>1,\*</sup> Eman A. Ragab,<sup>1</sup> Mohamed S. Nafie<sup>2</sup> and Ashraf A. Abbas<sup>1,\*</sup>

<sup>1</sup> Department of Chemistry, Faculty of Science, Cairo University, Giza, 12613, Egypt.

<sup>2</sup> Department of Chemistry, Faculty of Science, Suez Canal University, Ismailia, 41522, Egypt.

Corresponding author 1: (Ashraf A. Abbas: E-mail: ashrafabbas@cu.edu.eg; ORCID: <https://orcid.org/my-orcid?orcid=0000-0001-7061-9907>

Corresponding author 2: Kamal M. Dawood: E-Mail: kmdawood@sci.cu.edu.eg ORCID: <https://orcid.org/0000-0002-1351-9886>

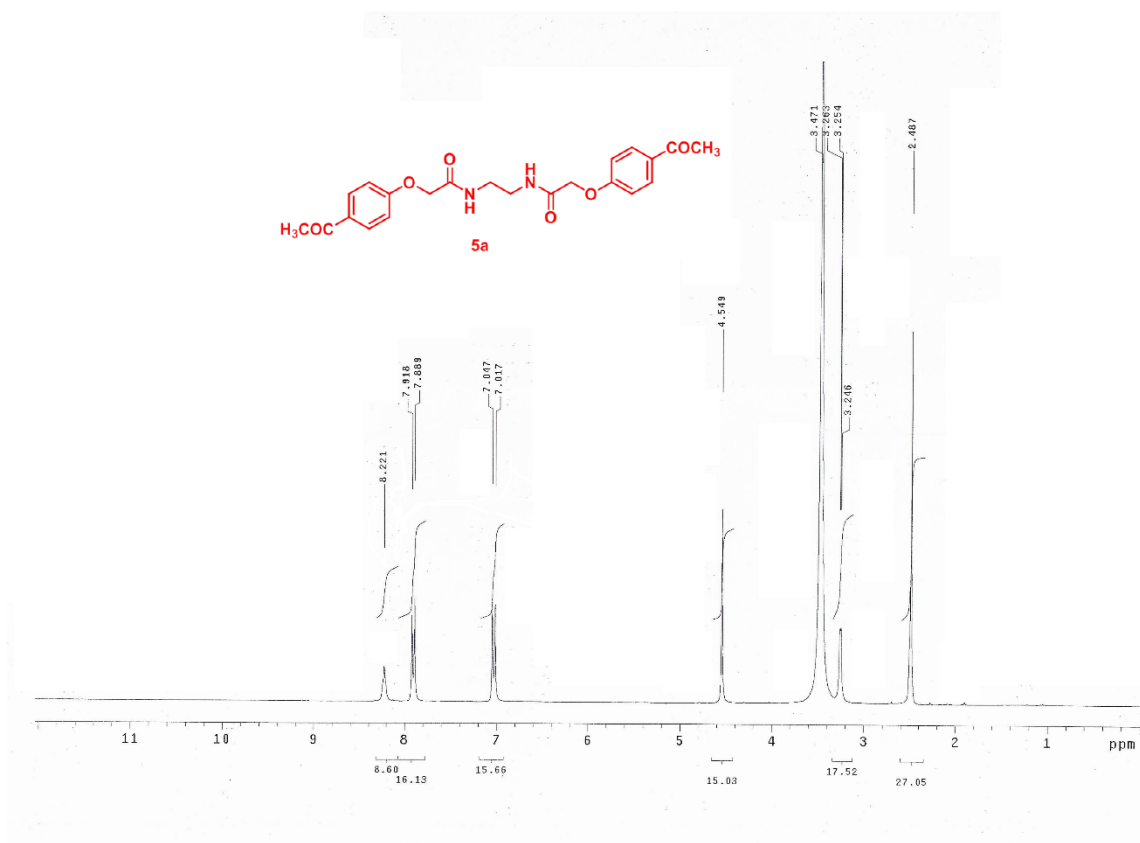

# <sup>1</sup>H NMR spectrum of 5a

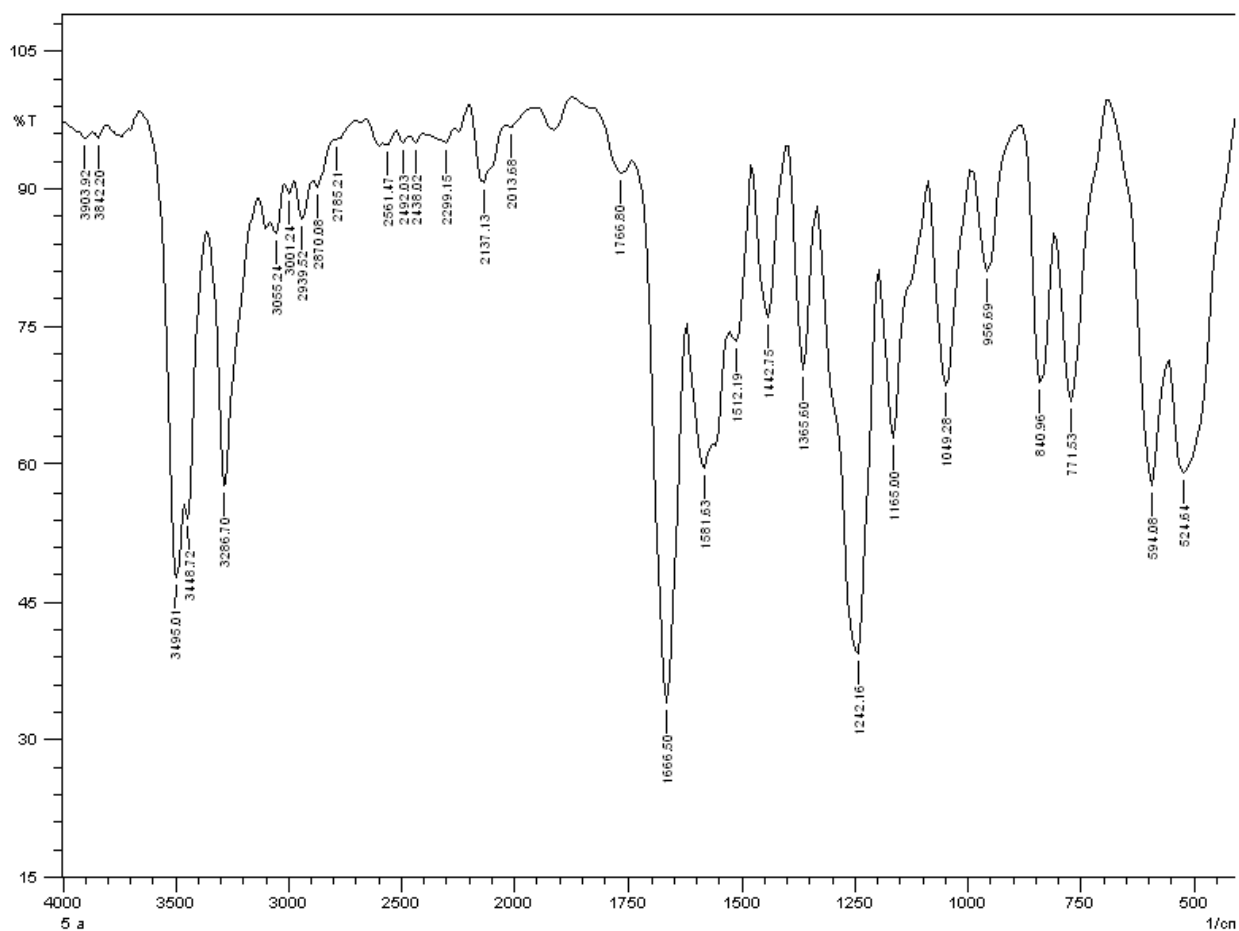

IR spectrum of 5a

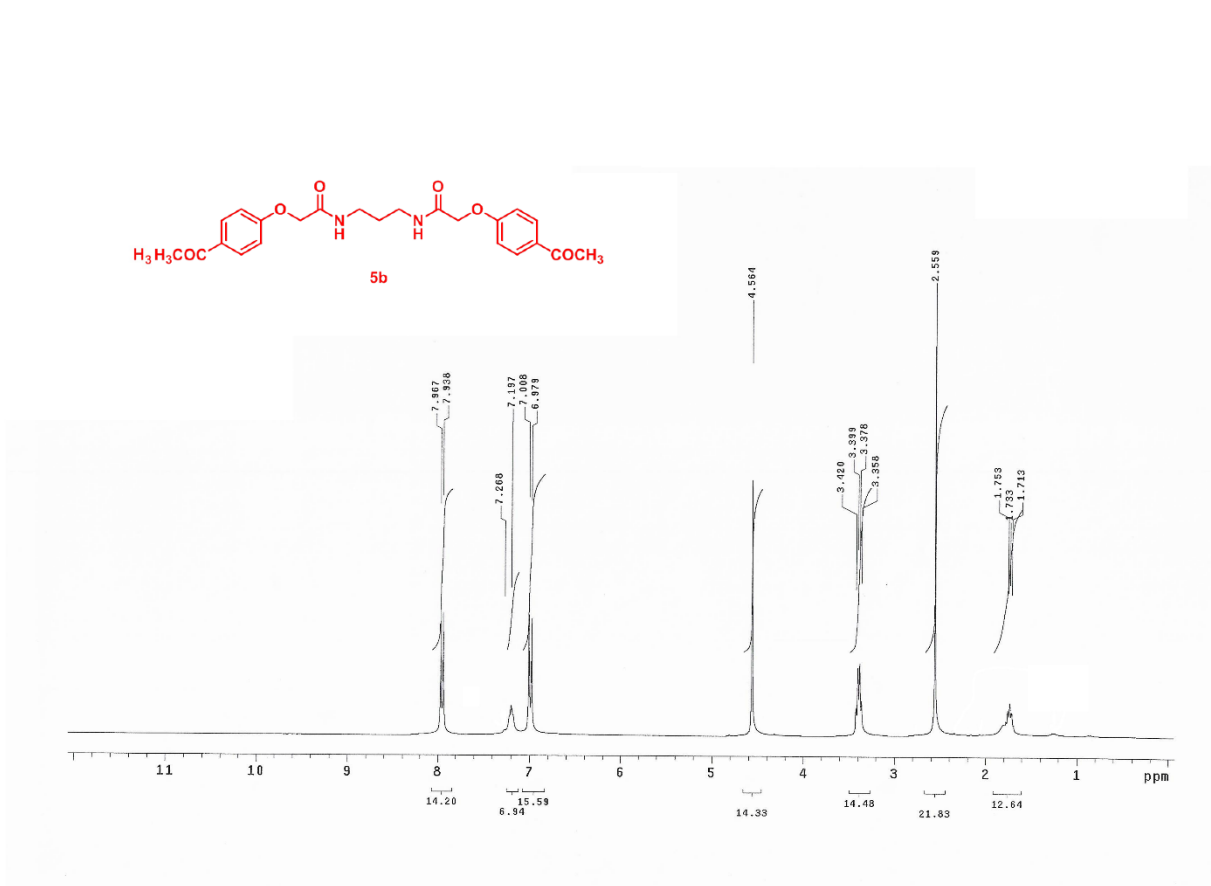

<sup>1</sup>H NMR spectrum of 5b

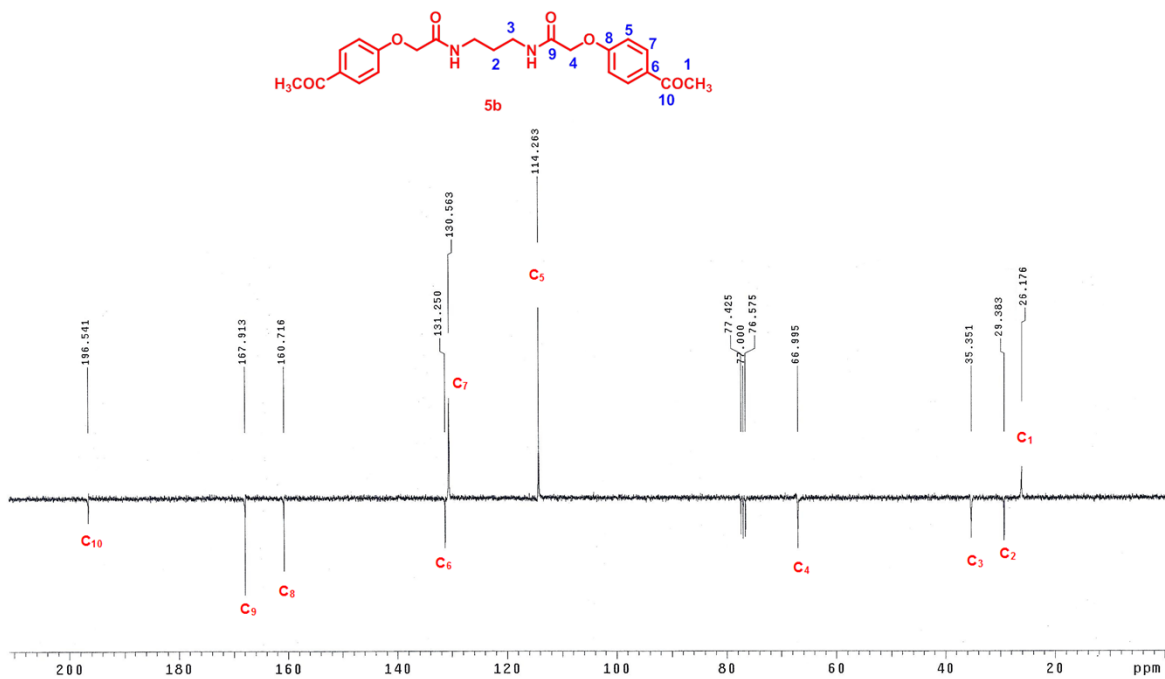

<sup>13</sup>C NMR spectrum of 5b (APT)

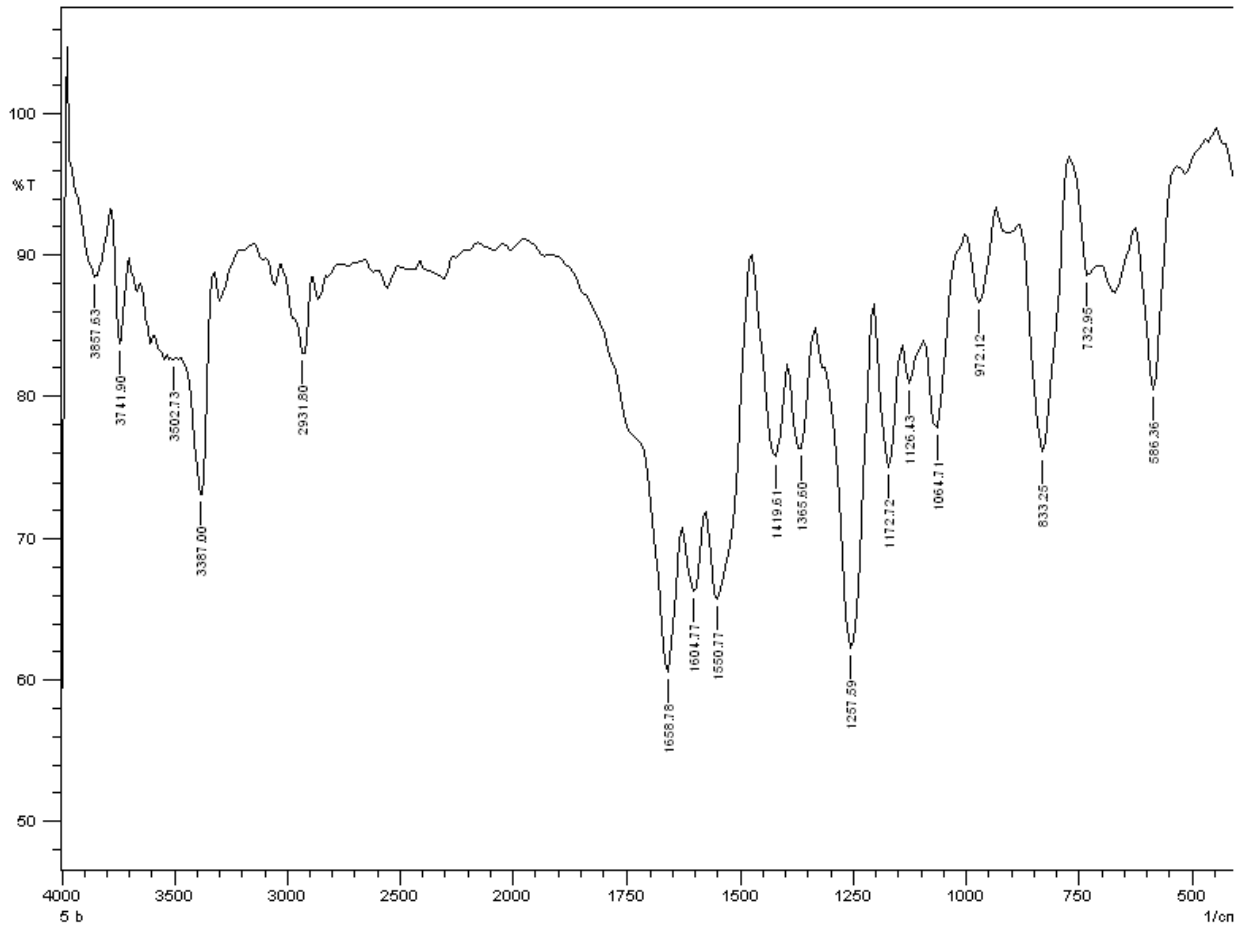

IR spectrum of 5b

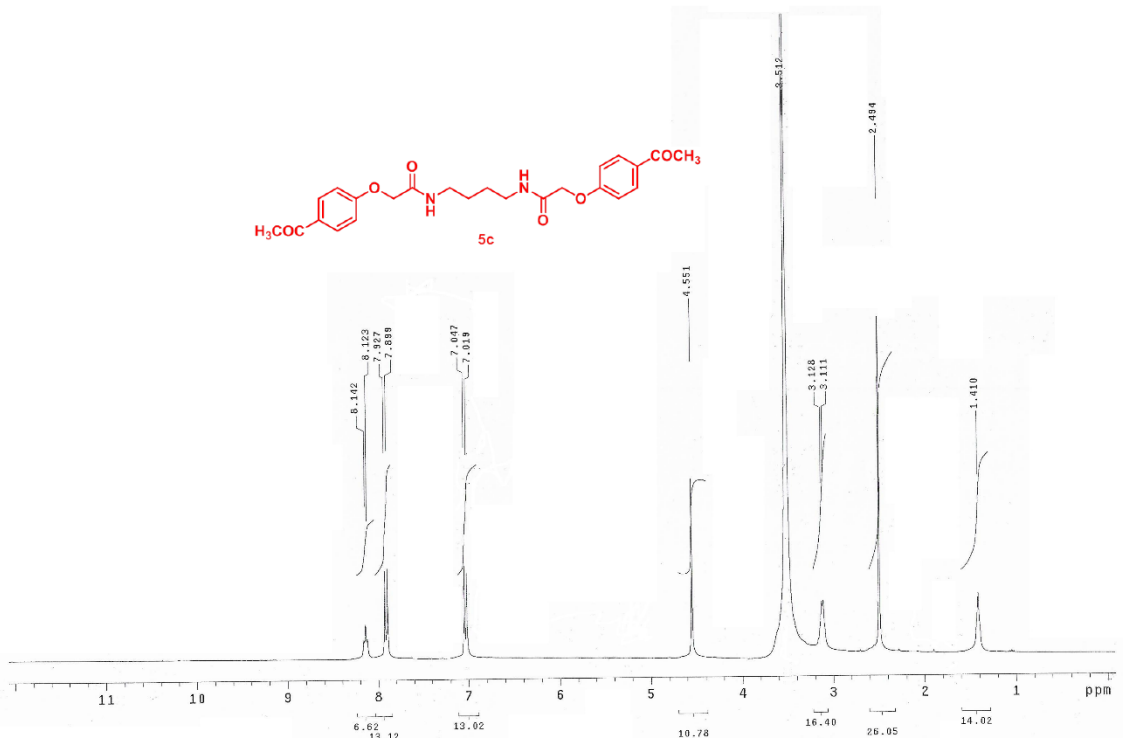

# <sup>1</sup>H NMR spectrum of 5c

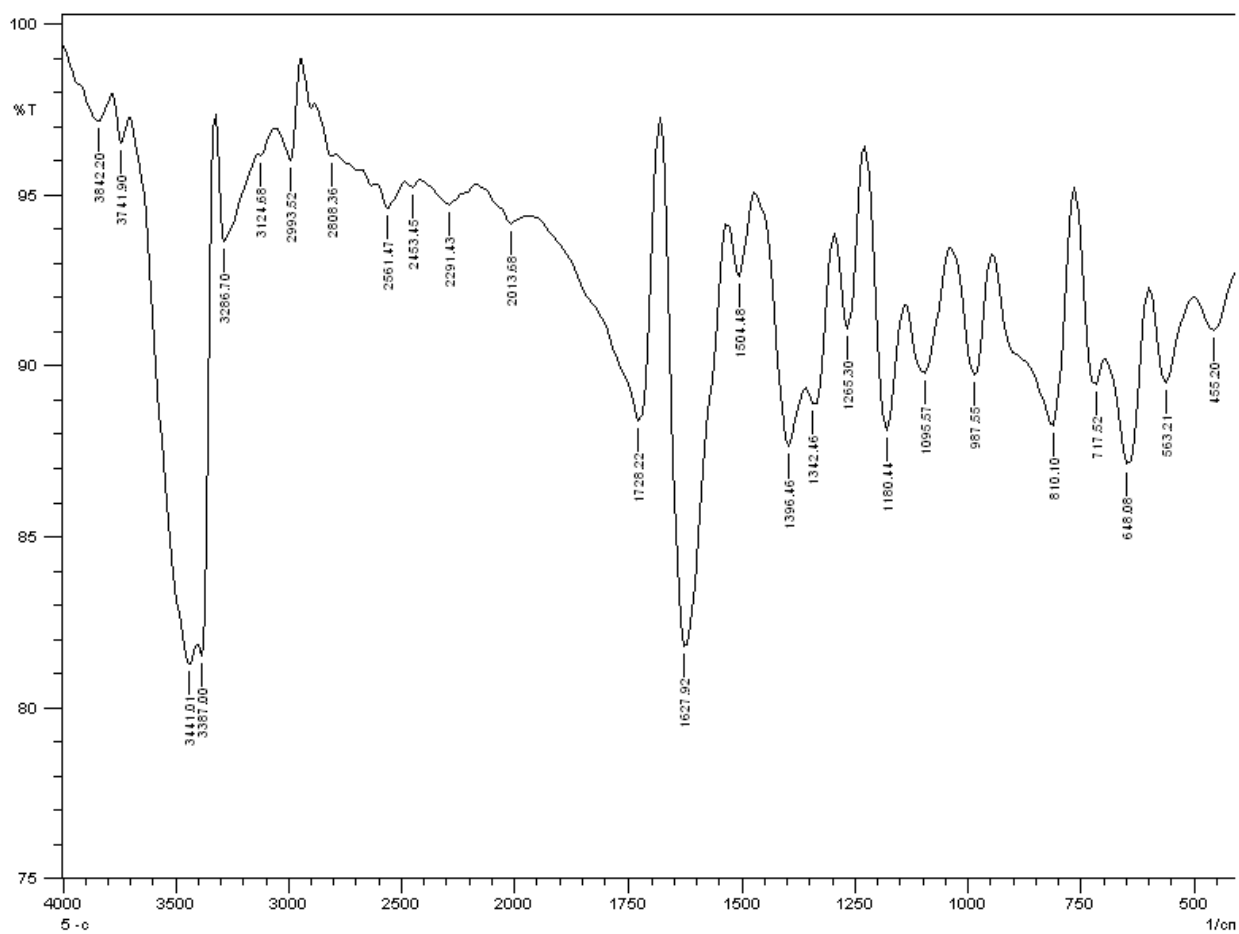

IR spectrum of 5c

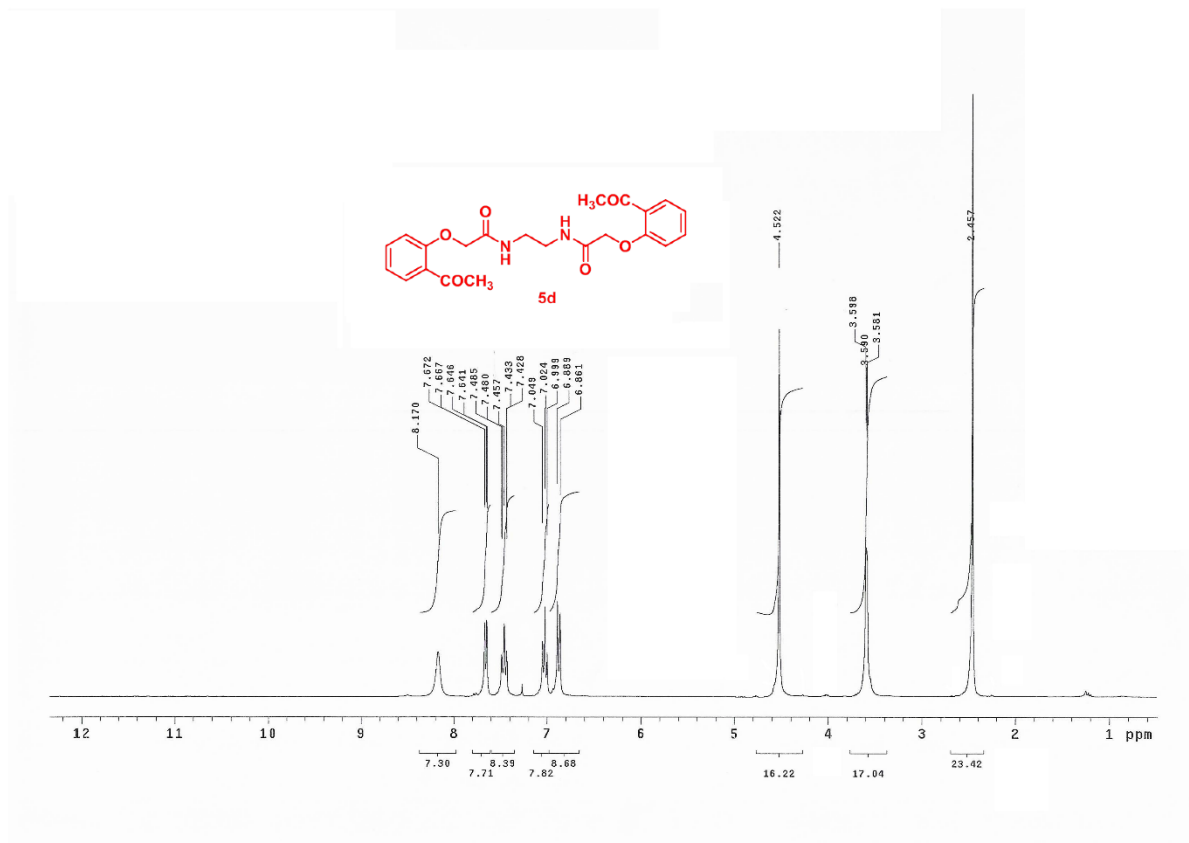

**<sup>1</sup>H NMR spectrum of 5d**

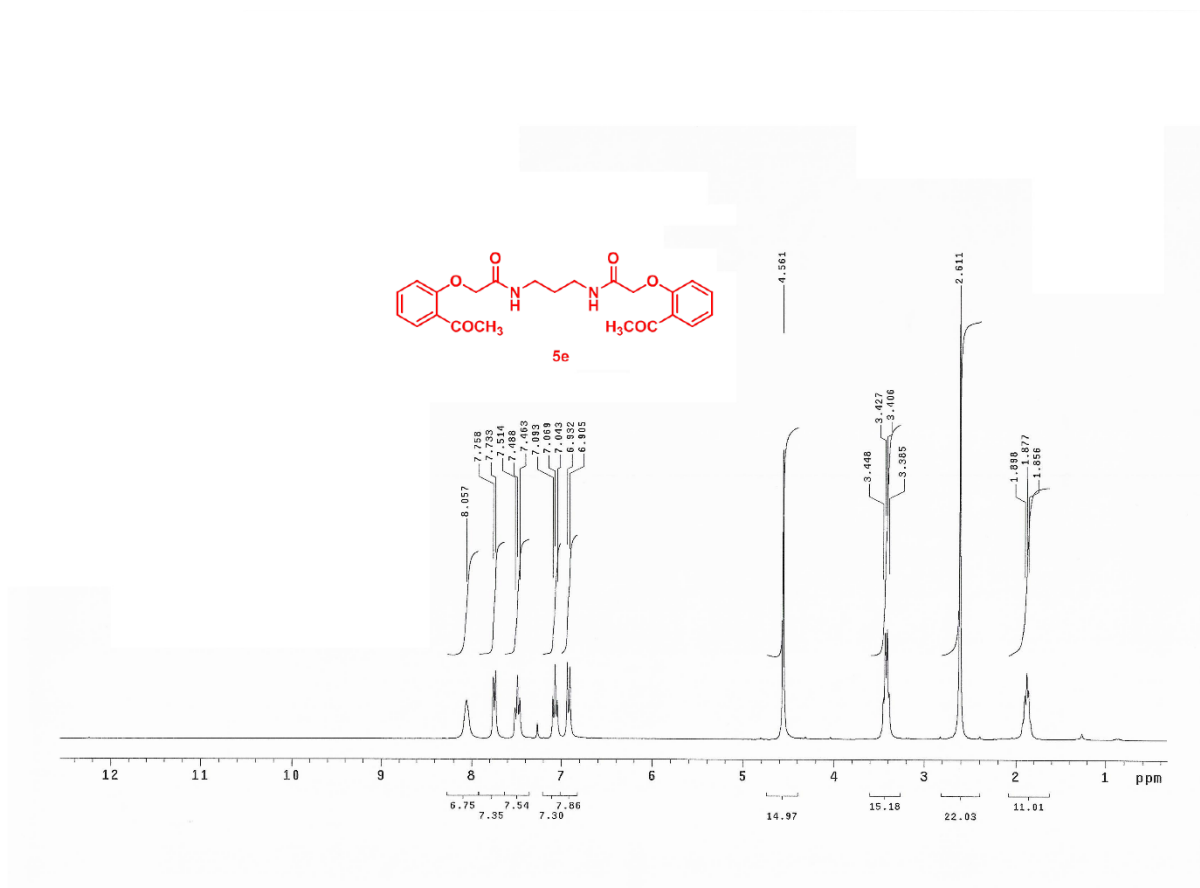

**<sup>1</sup>H NMR spectrum of 5e**

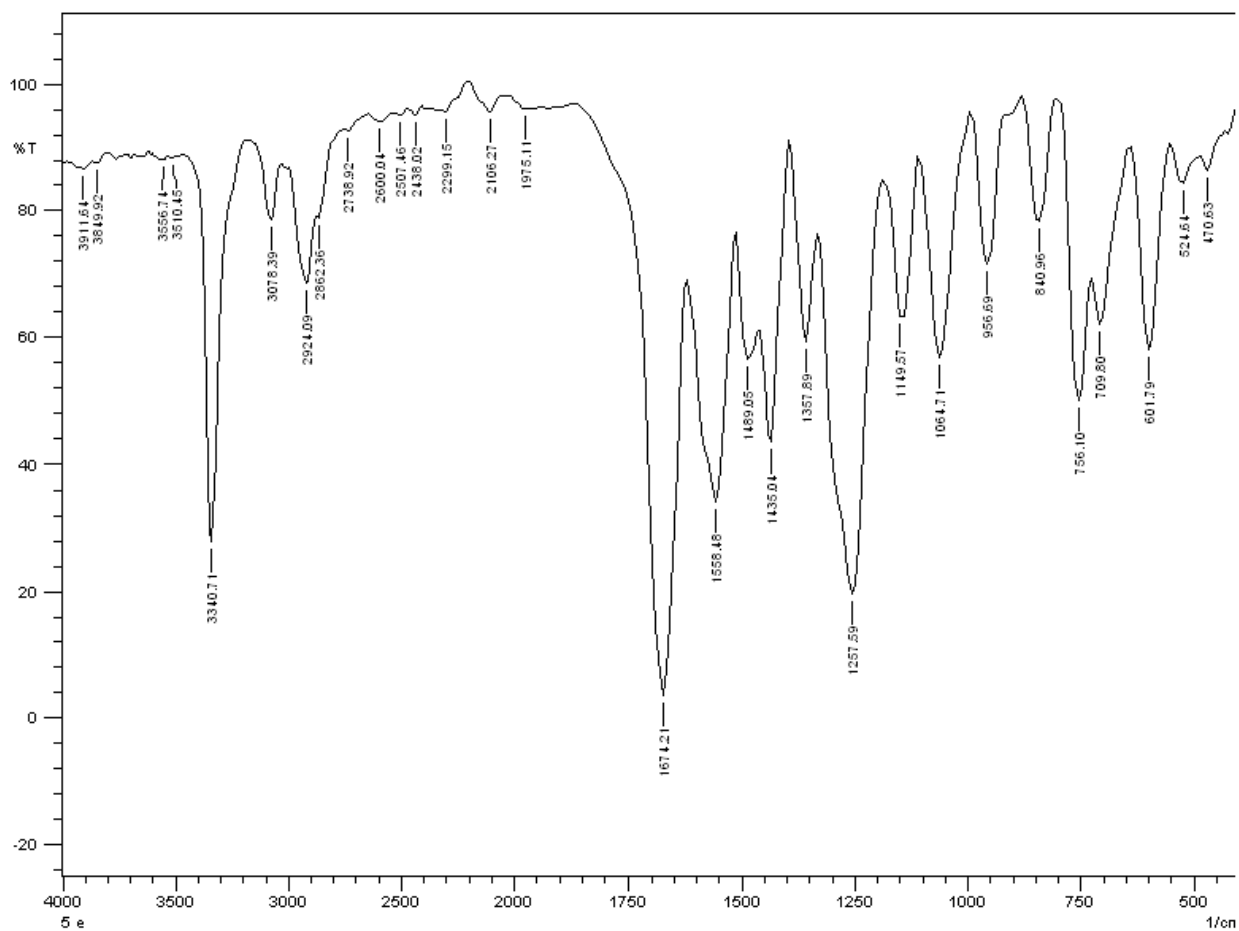

IR spectrum of 5e



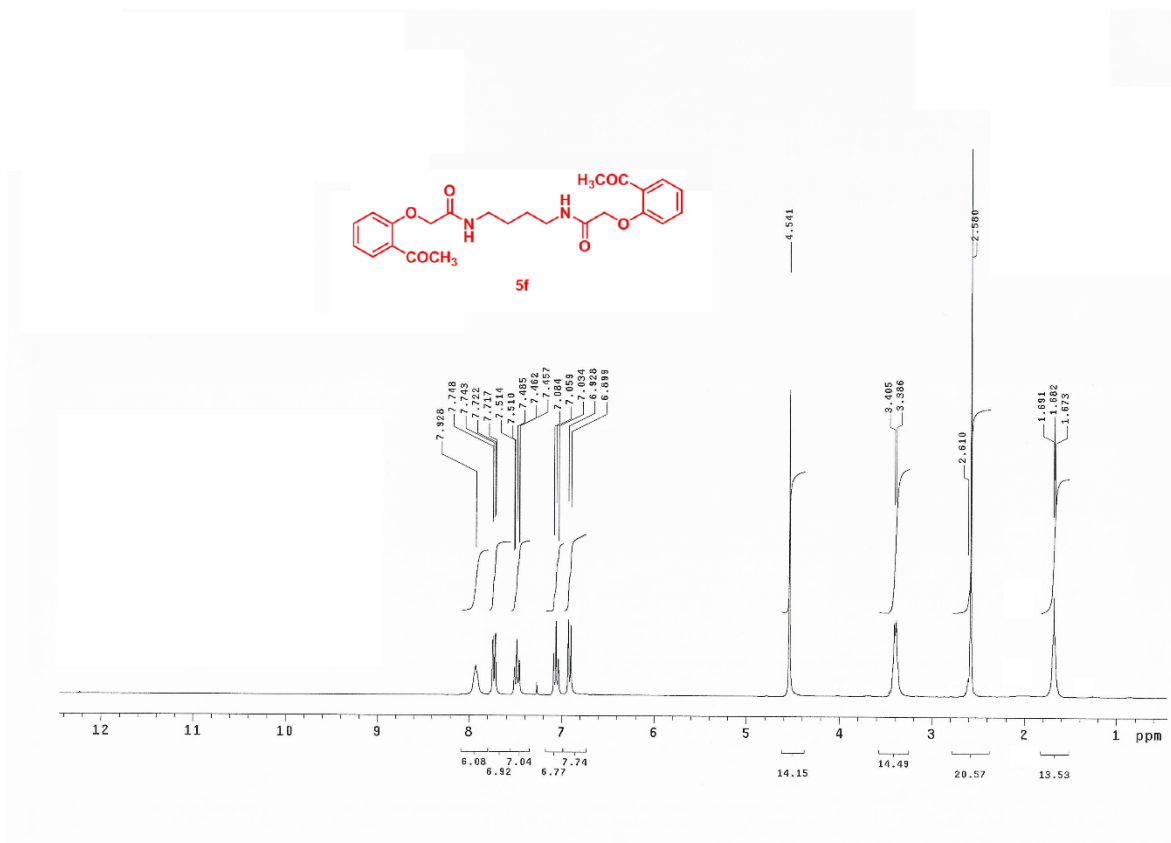

**<sup>1</sup>H NMR spectrum of 5f**

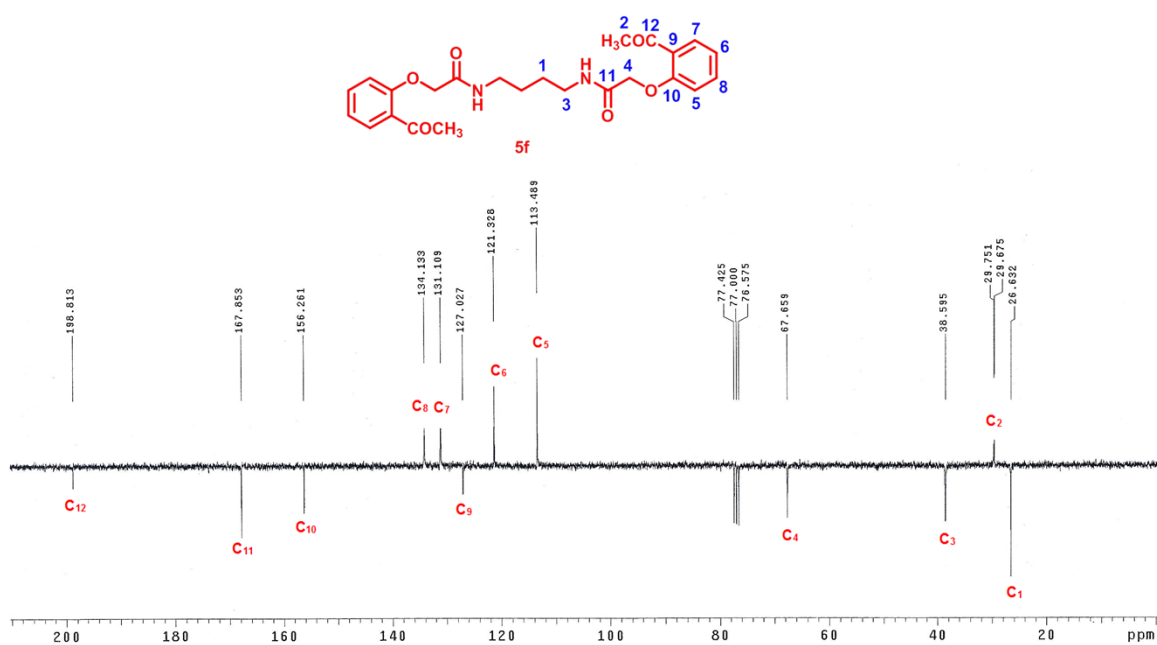

**<sup>13</sup>C NMR spectrum of 5f (APT)**

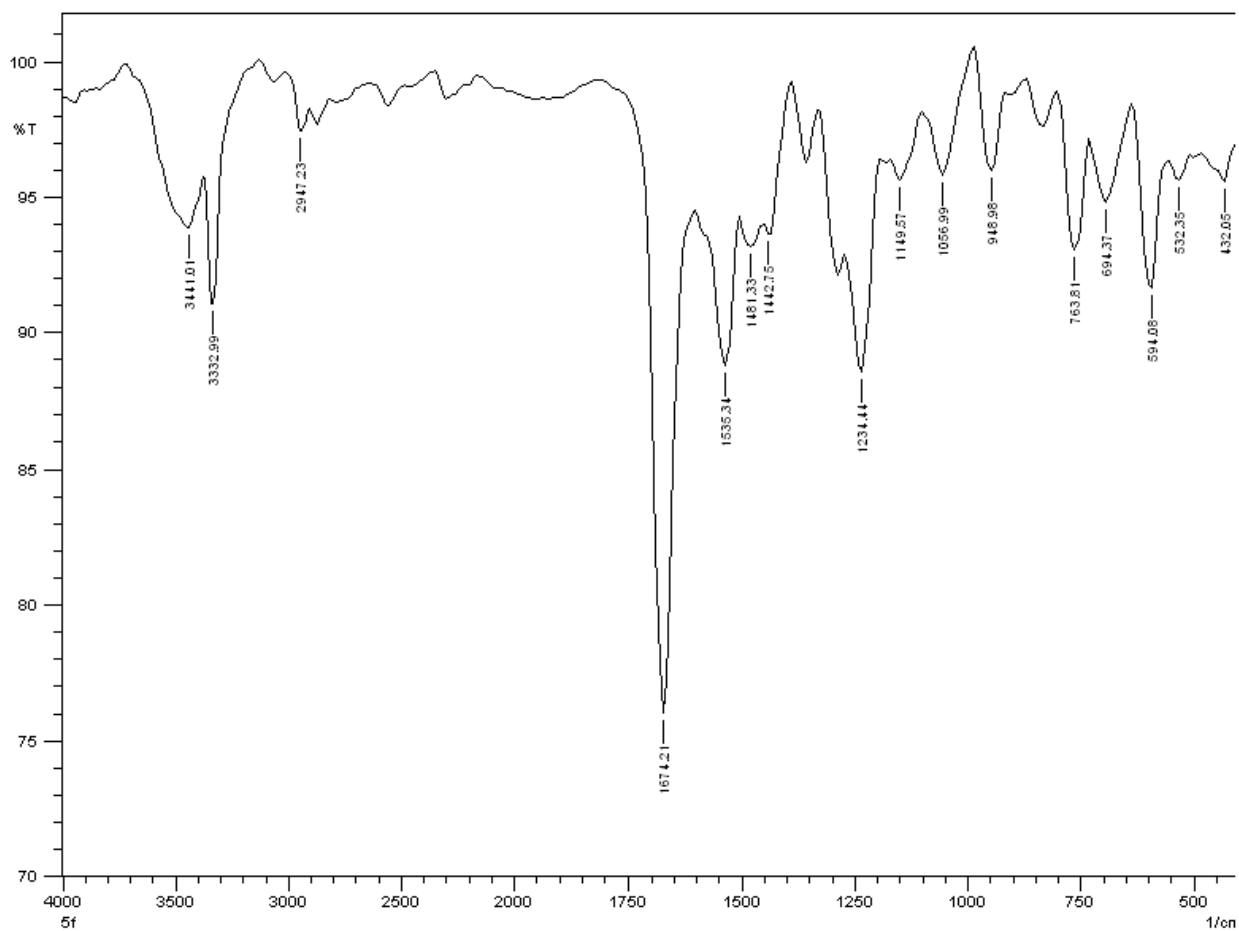

**IR spectrum of 5f**

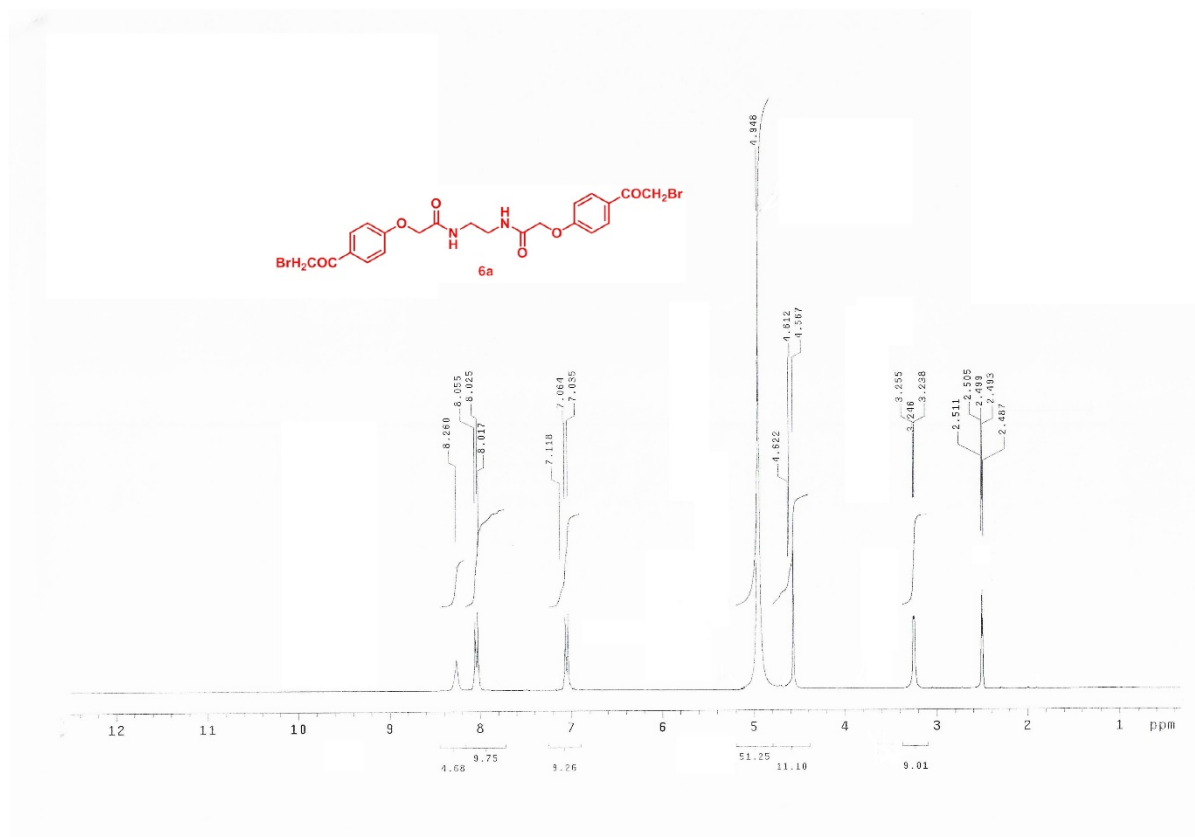

**<sup>1</sup>H NMR spectrum of 6a**

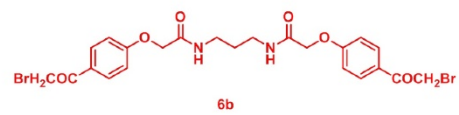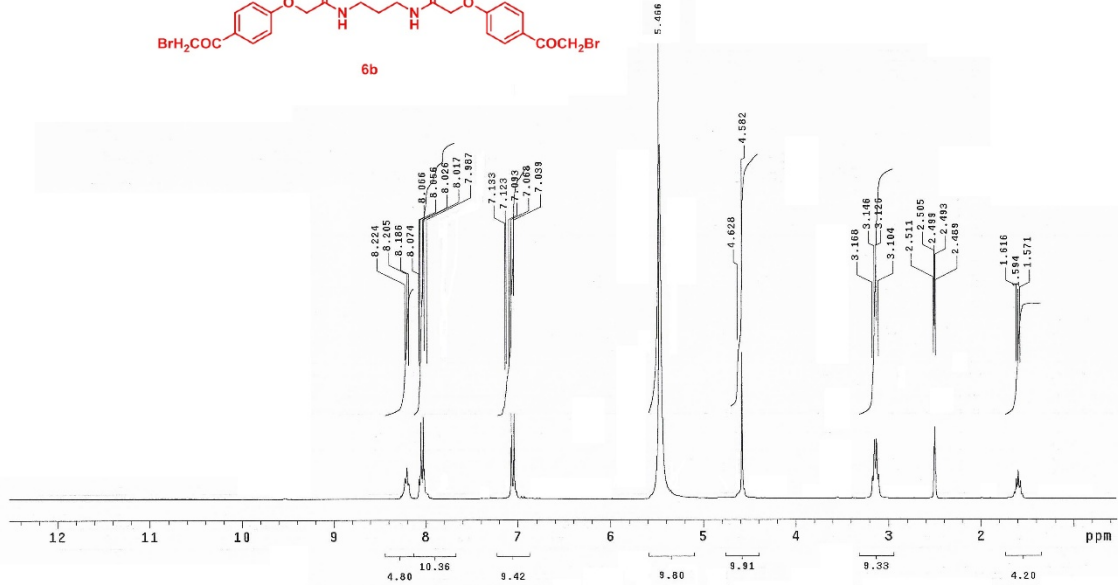

**<sup>1</sup>H NMR spectrum of 6b**

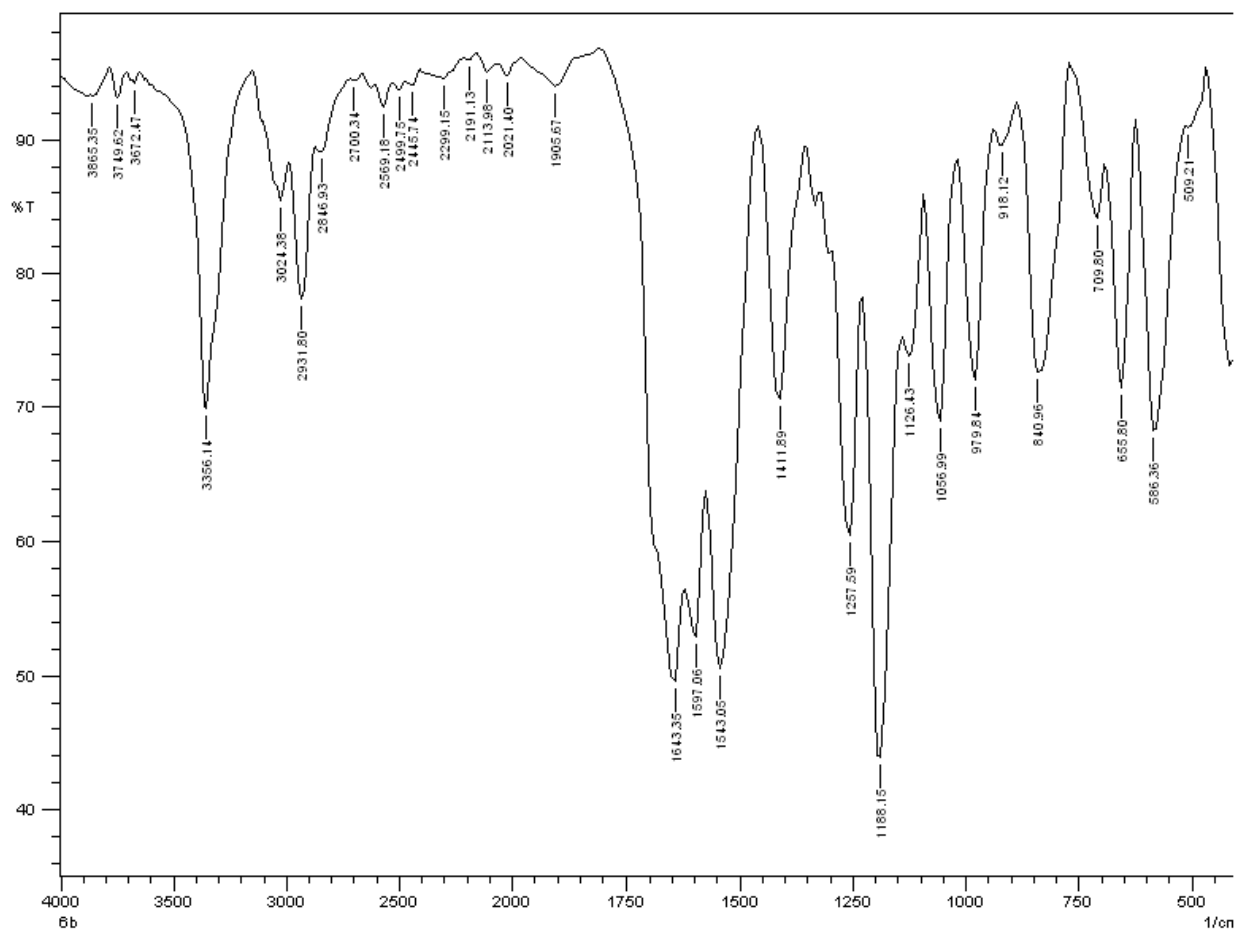

IR spectrum of 6b

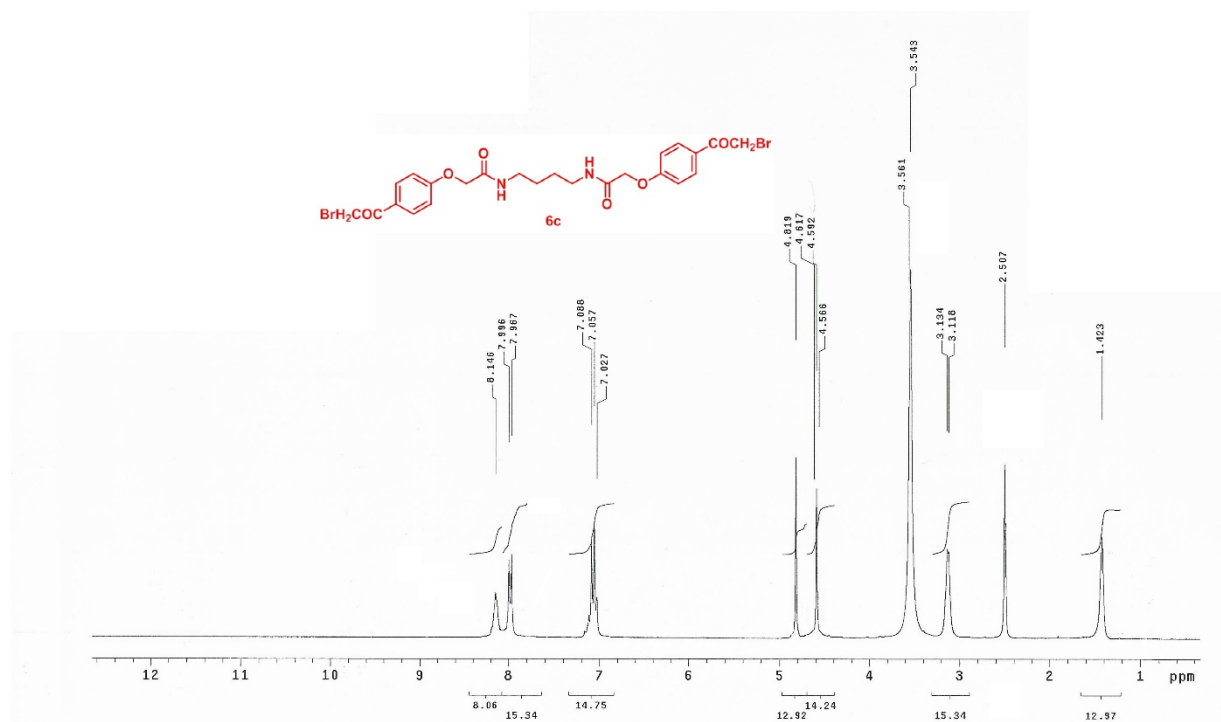

$^1\text{H}$  NMR spectrum of **6c**

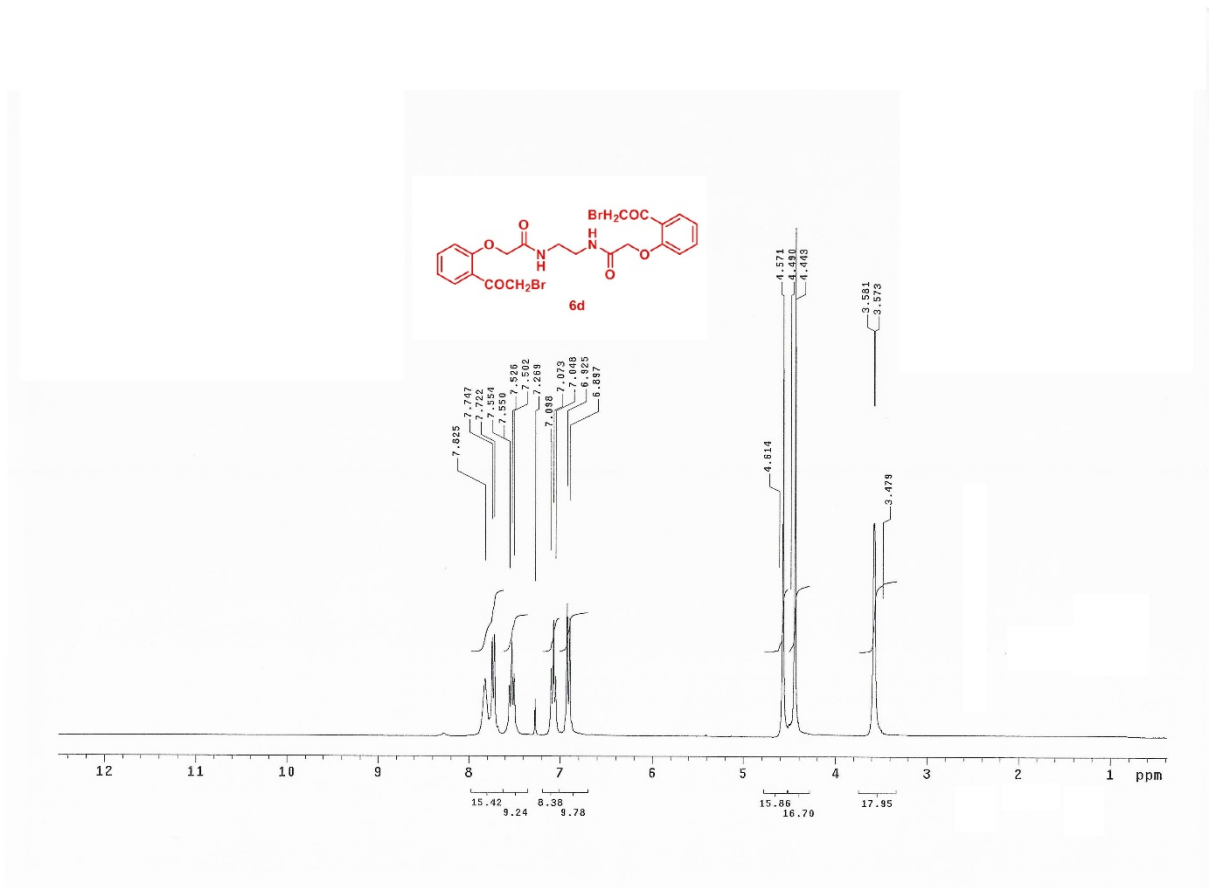

$^1\text{H}$  NMR spectrum of **6d**

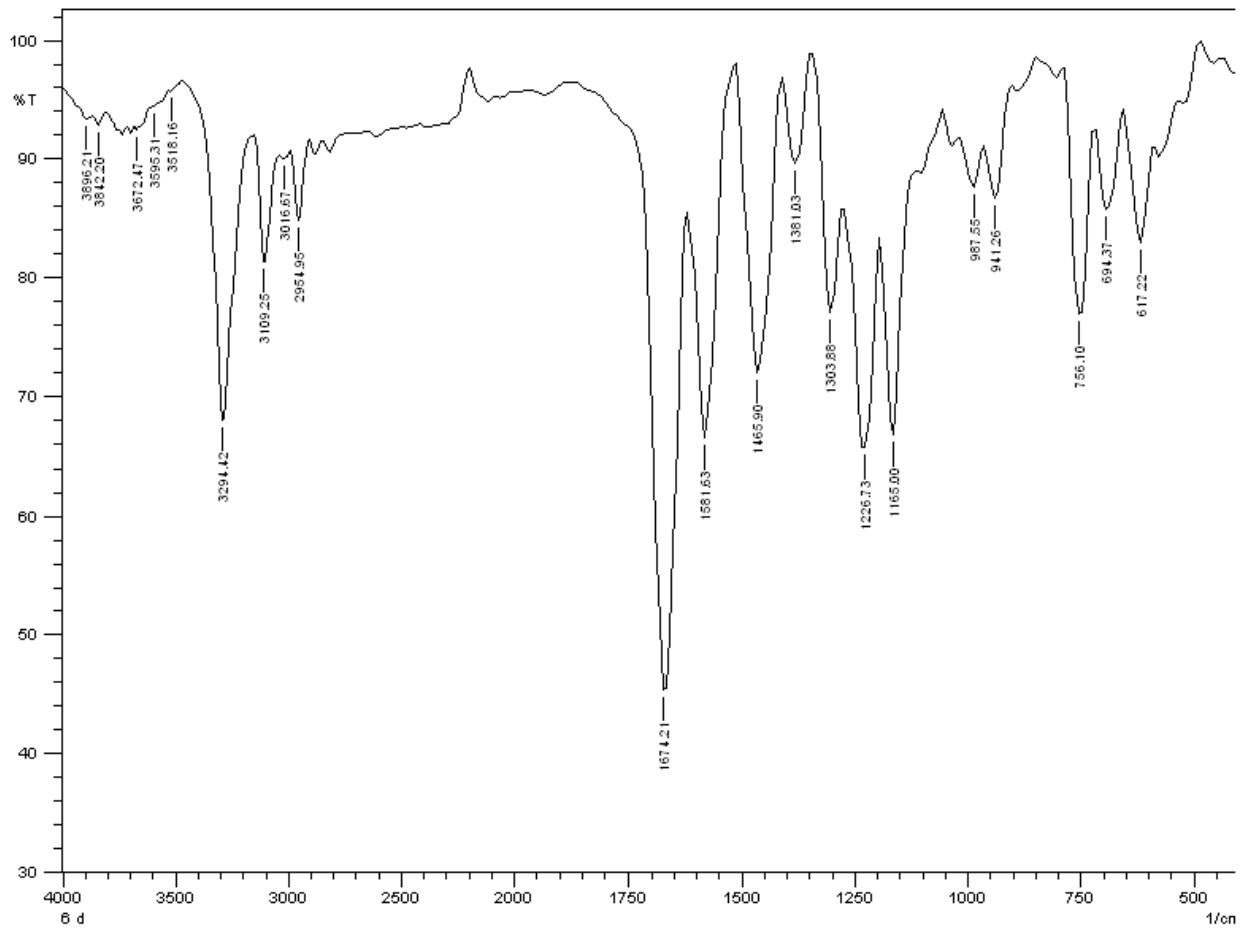

IR spectrum of 6d



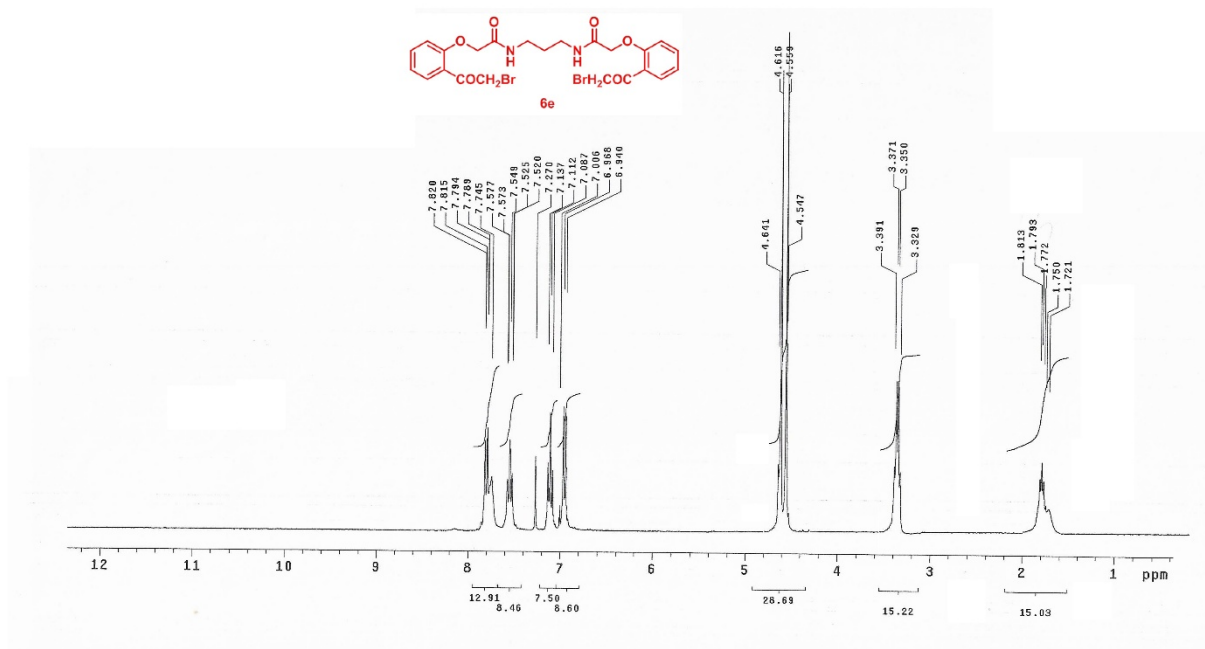

**<sup>1</sup>H NMR spectrum of 6e**

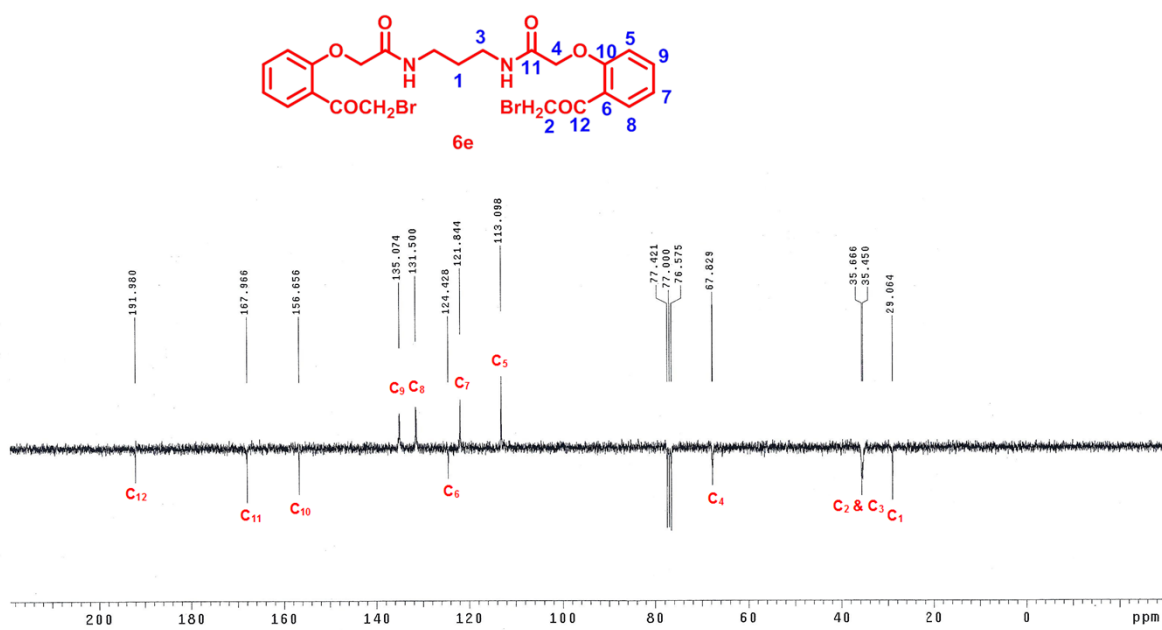

**<sup>13</sup>C NMR spectrum of 6e (APT)**

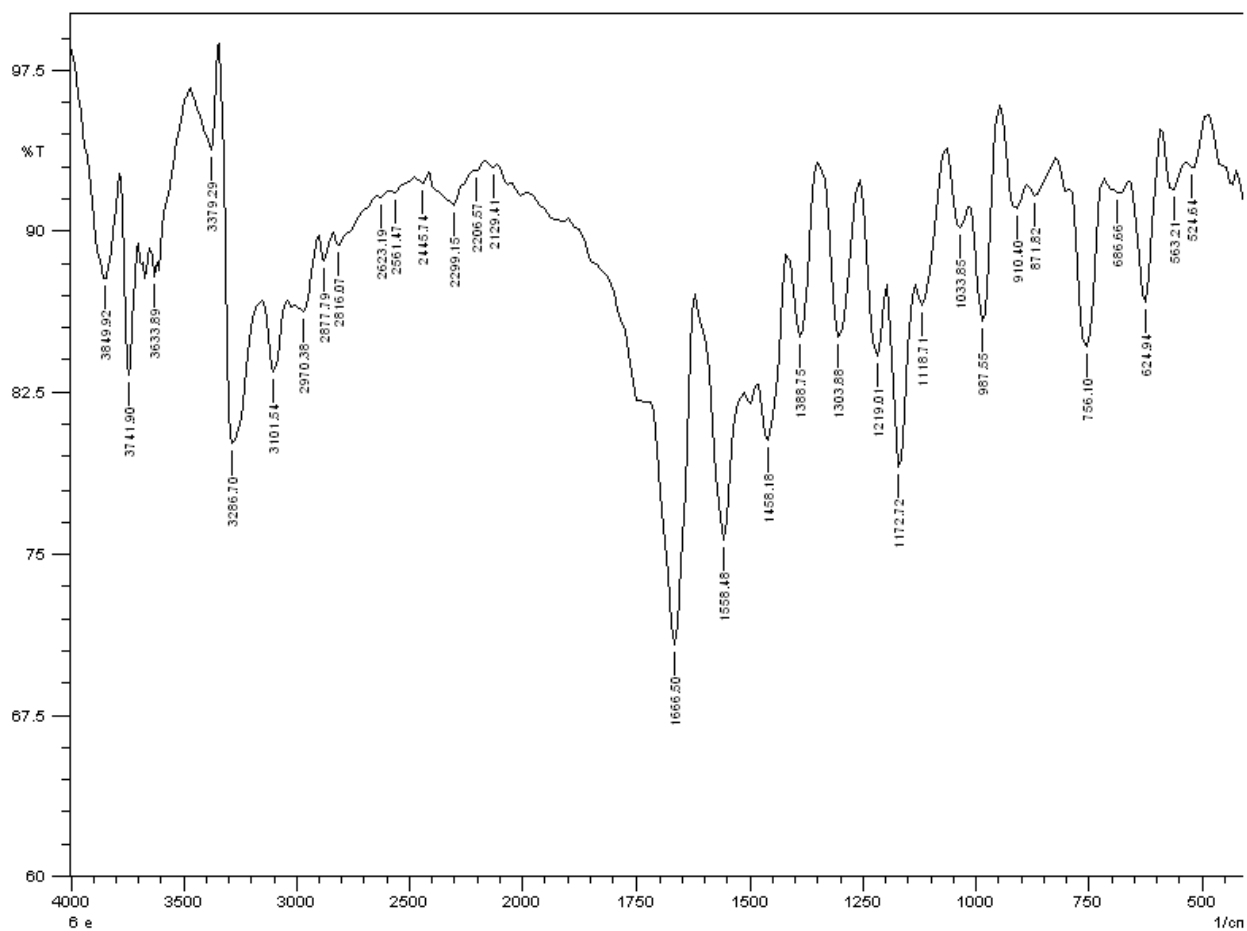

IR spectrum of 6e

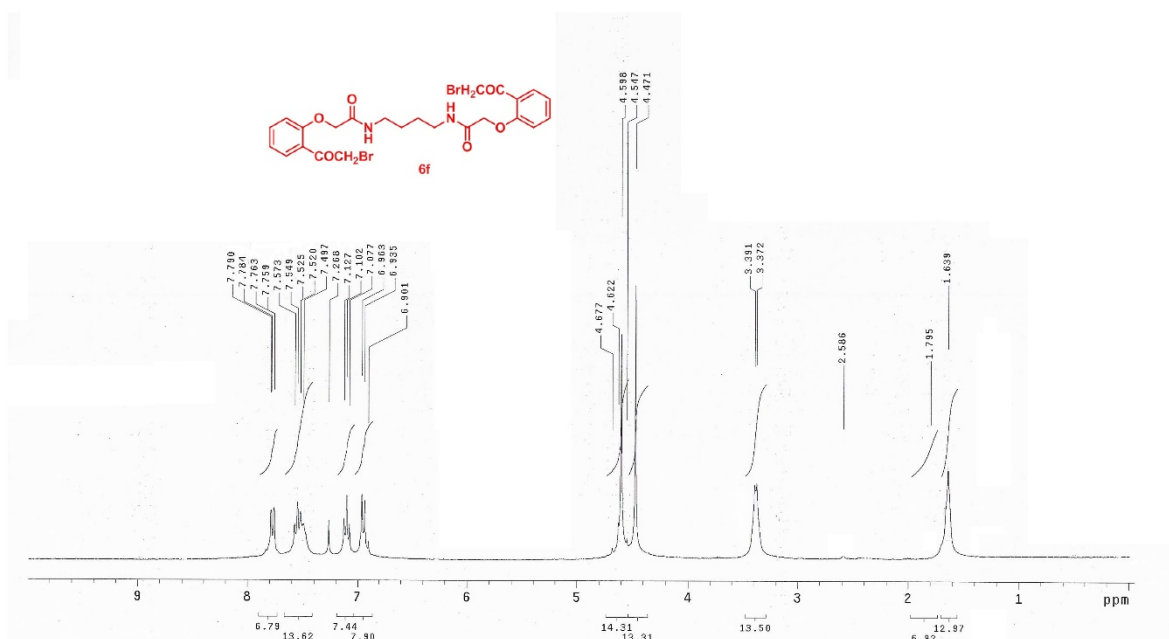

**<sup>1</sup>H NMR spectrum of 6f**

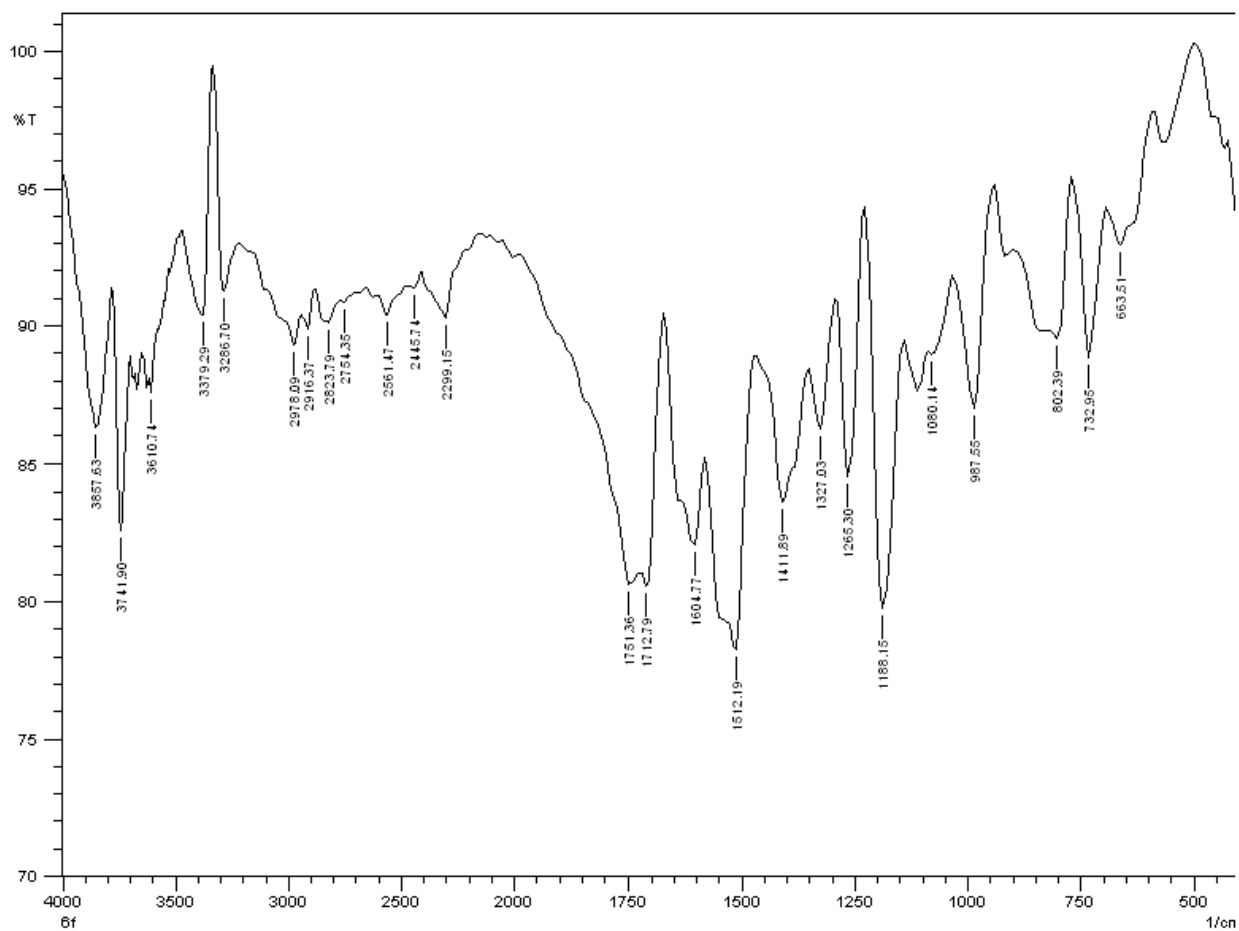

IR spectrum of 6f

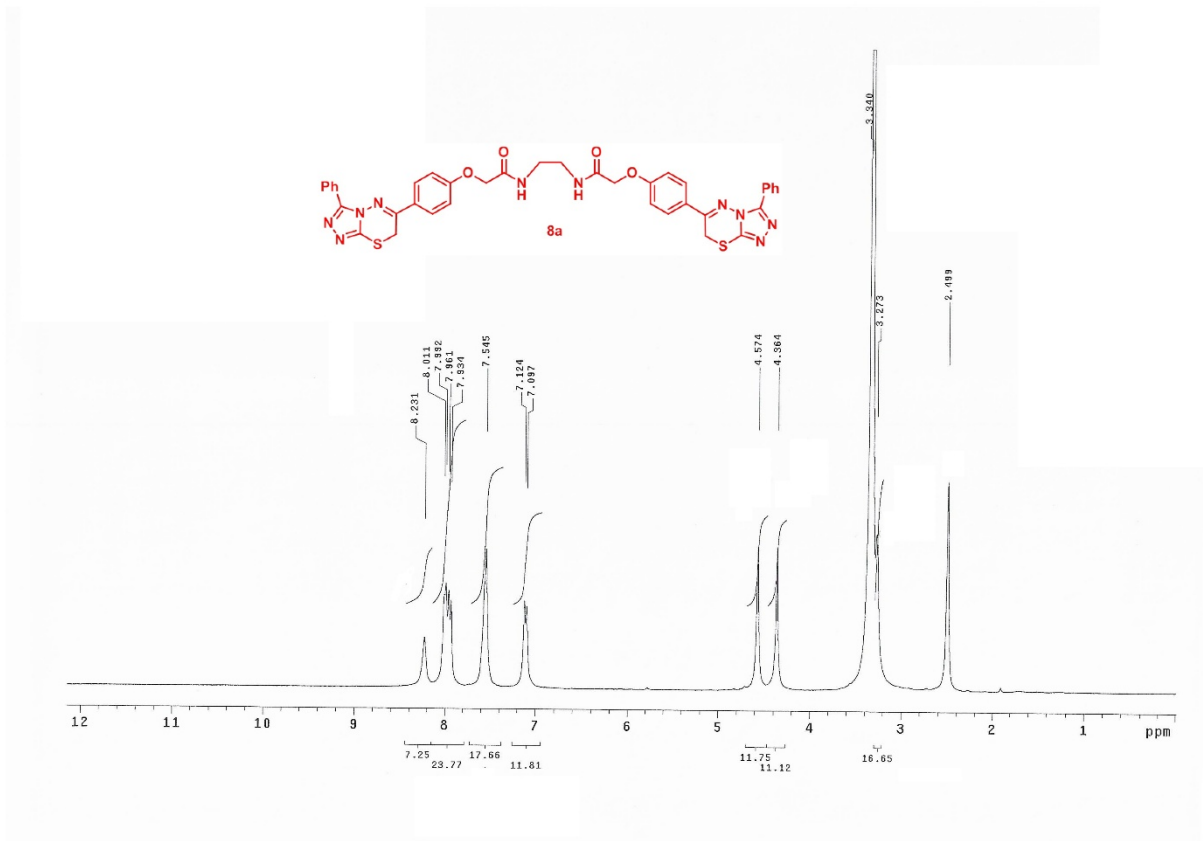

**<sup>1</sup>H NMR spectrum of 8a**

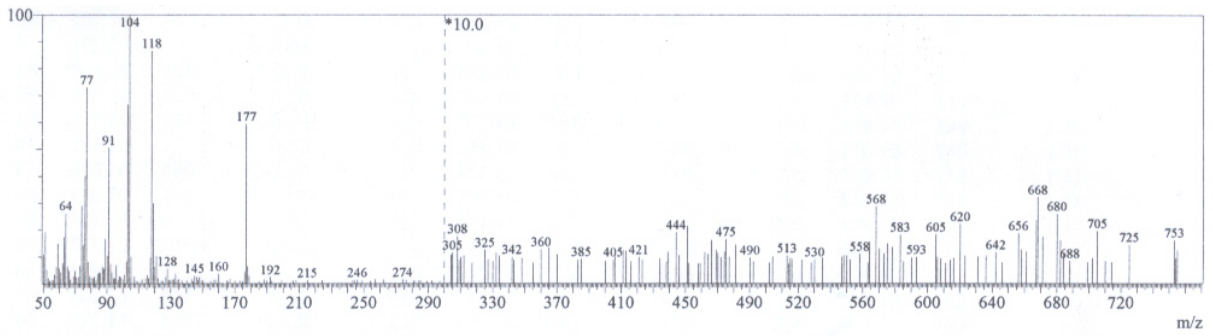

**Mass spectrum of 8a**

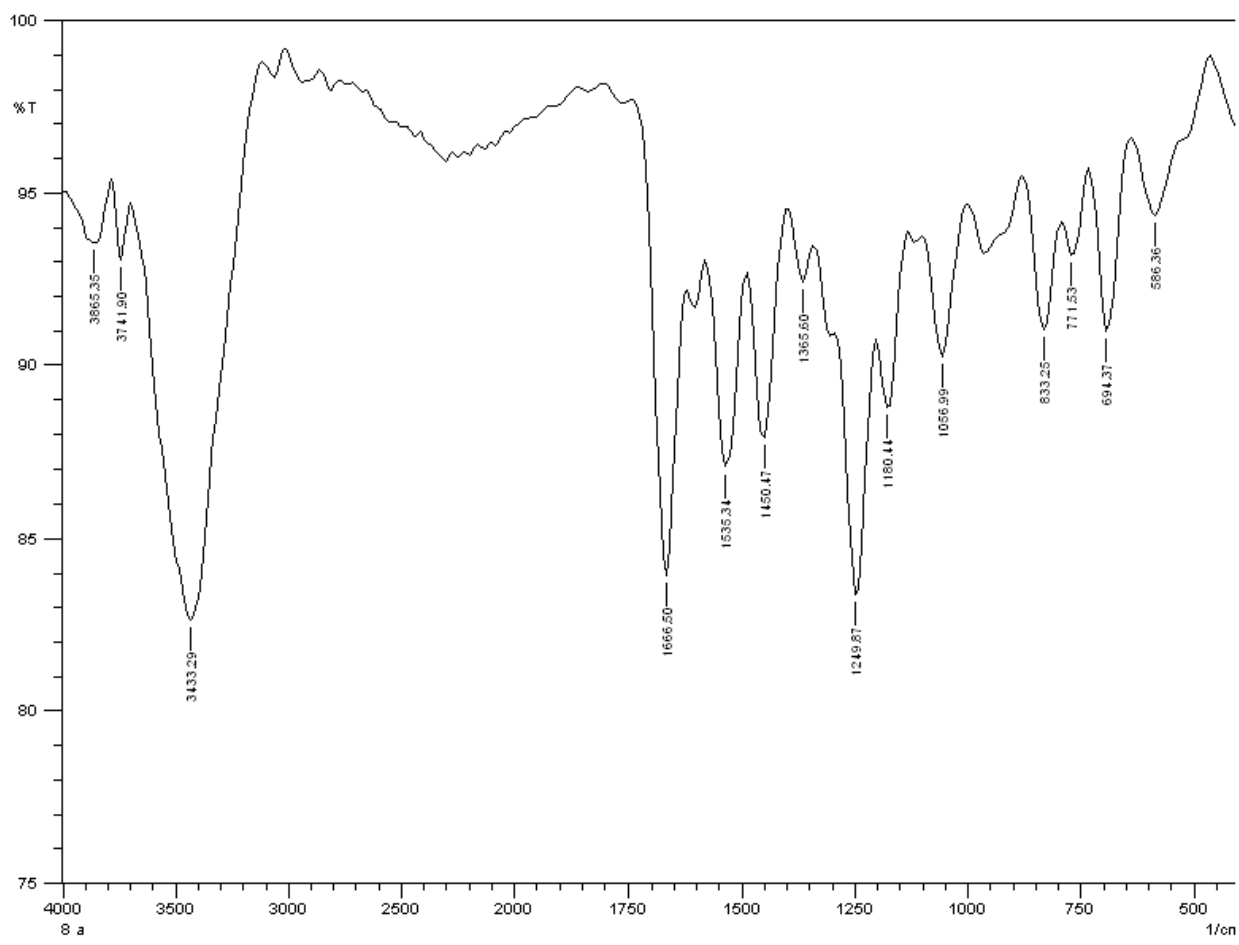

**IR spectrum of 8a**

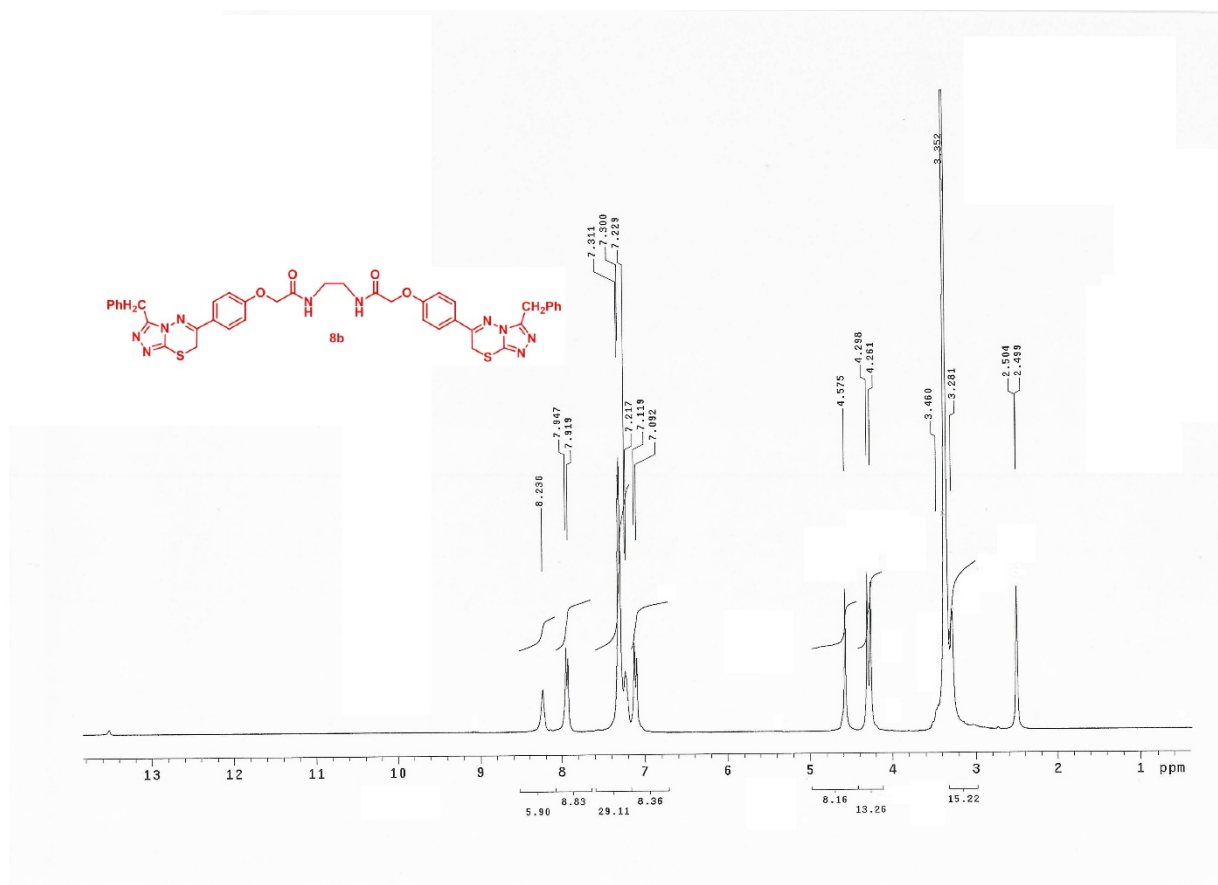

**<sup>1</sup>H NMR spectrum of 8b**

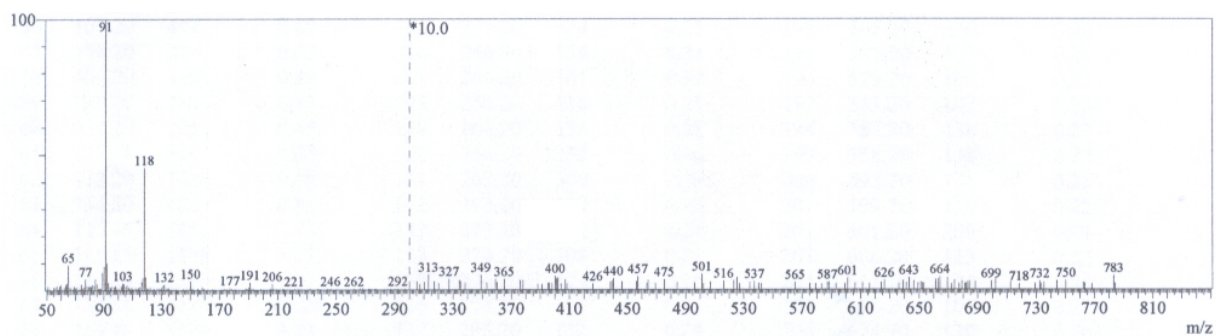

**Mass spectrum of 8b**

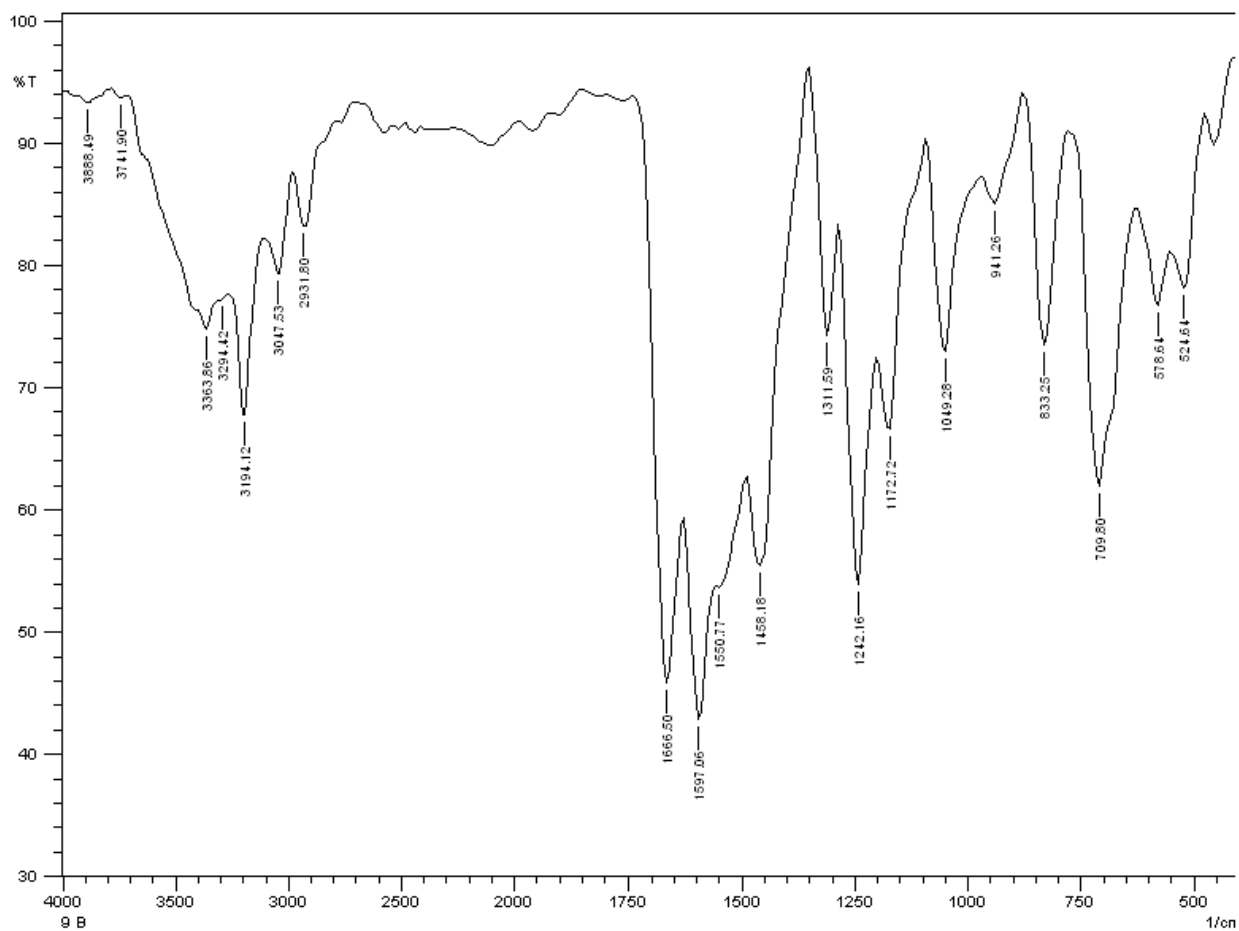

**IR spectrum of 8b**



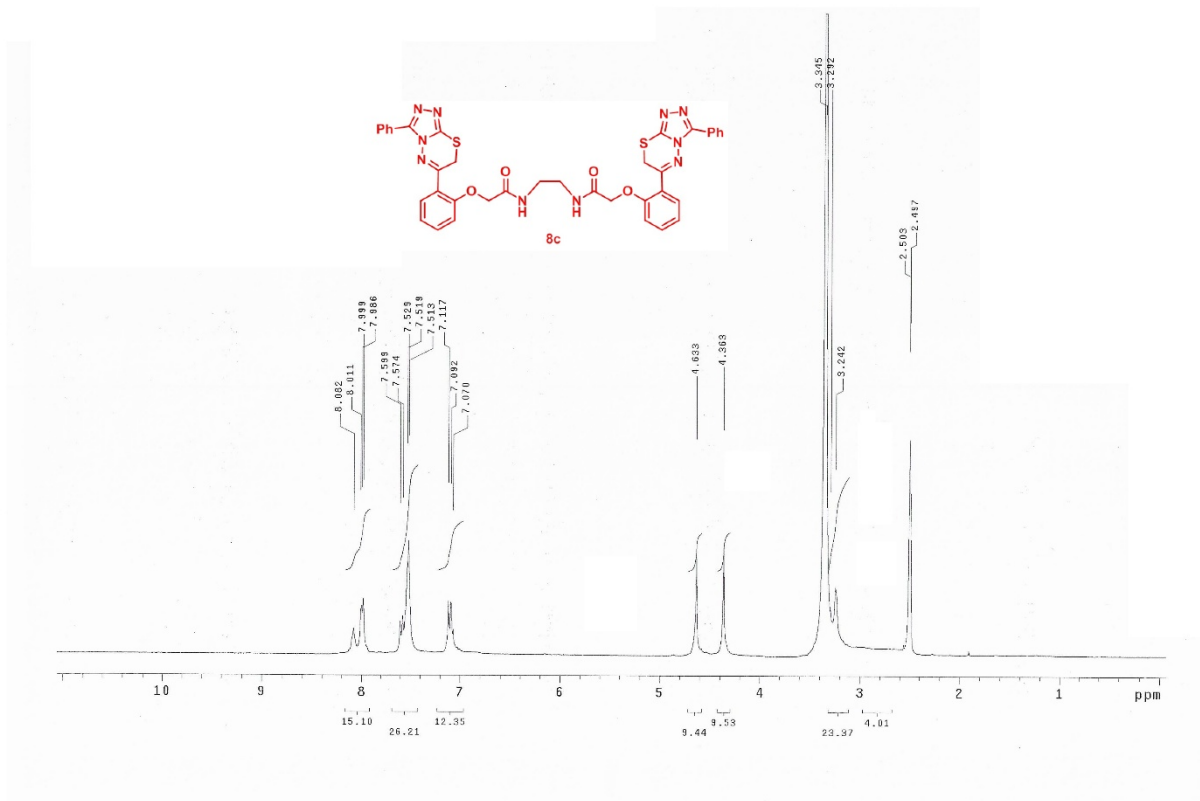

**<sup>1</sup>H NMR spectrum of 8c**

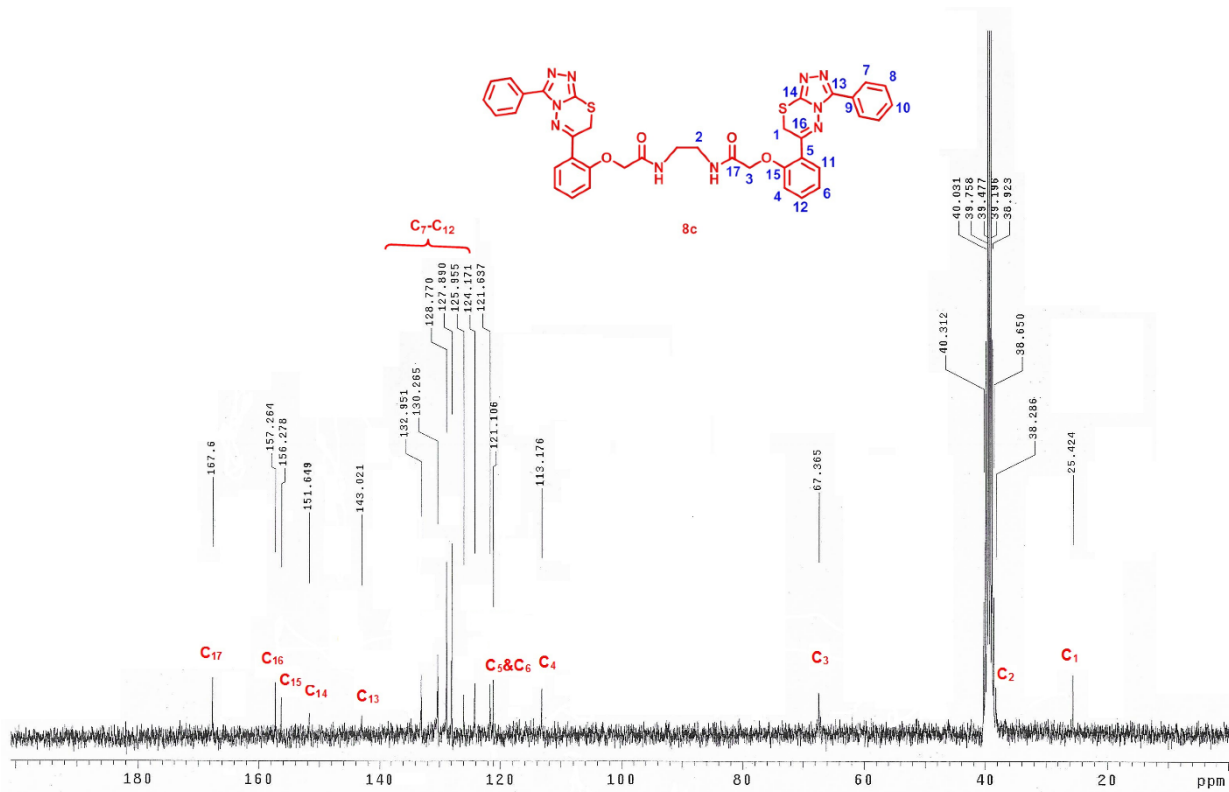

**<sup>13</sup>C NMR spectrum of 8c**

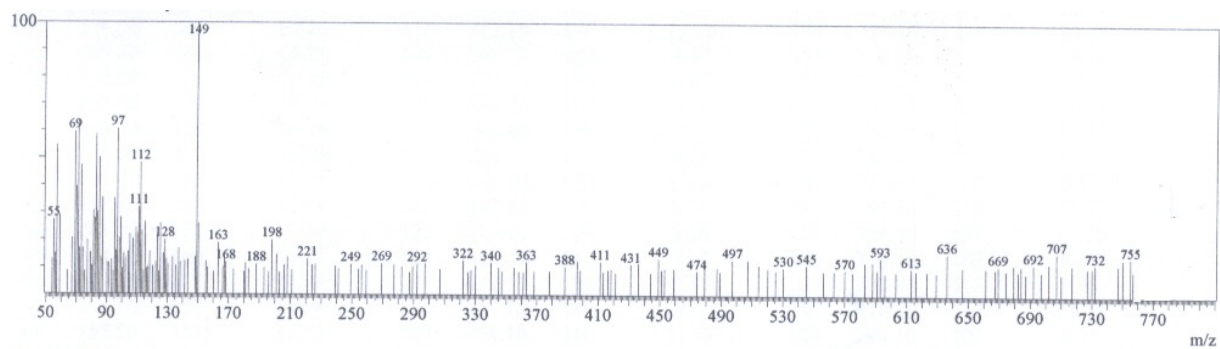

Mass spectrum of 8c

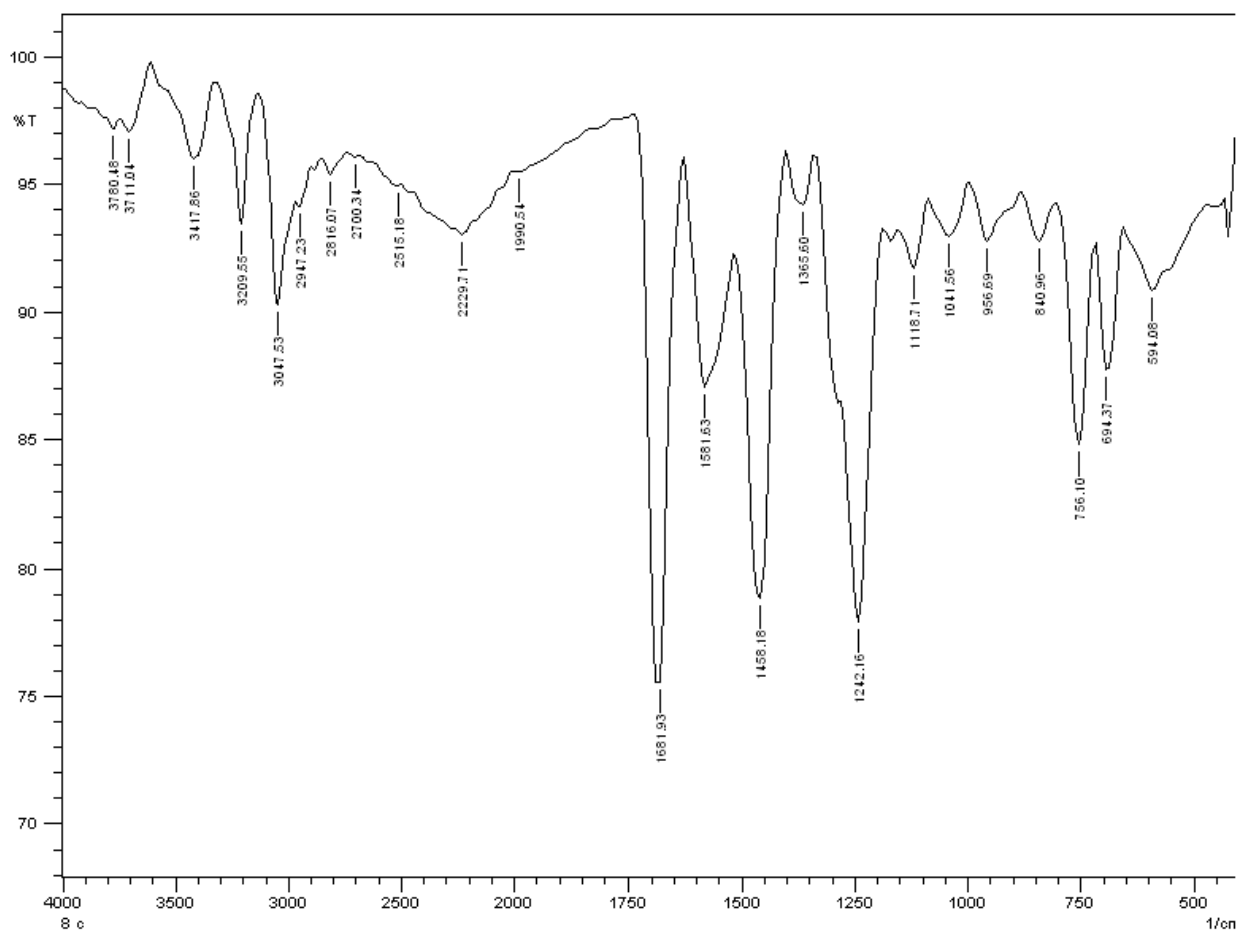

IR spectrum of 8c

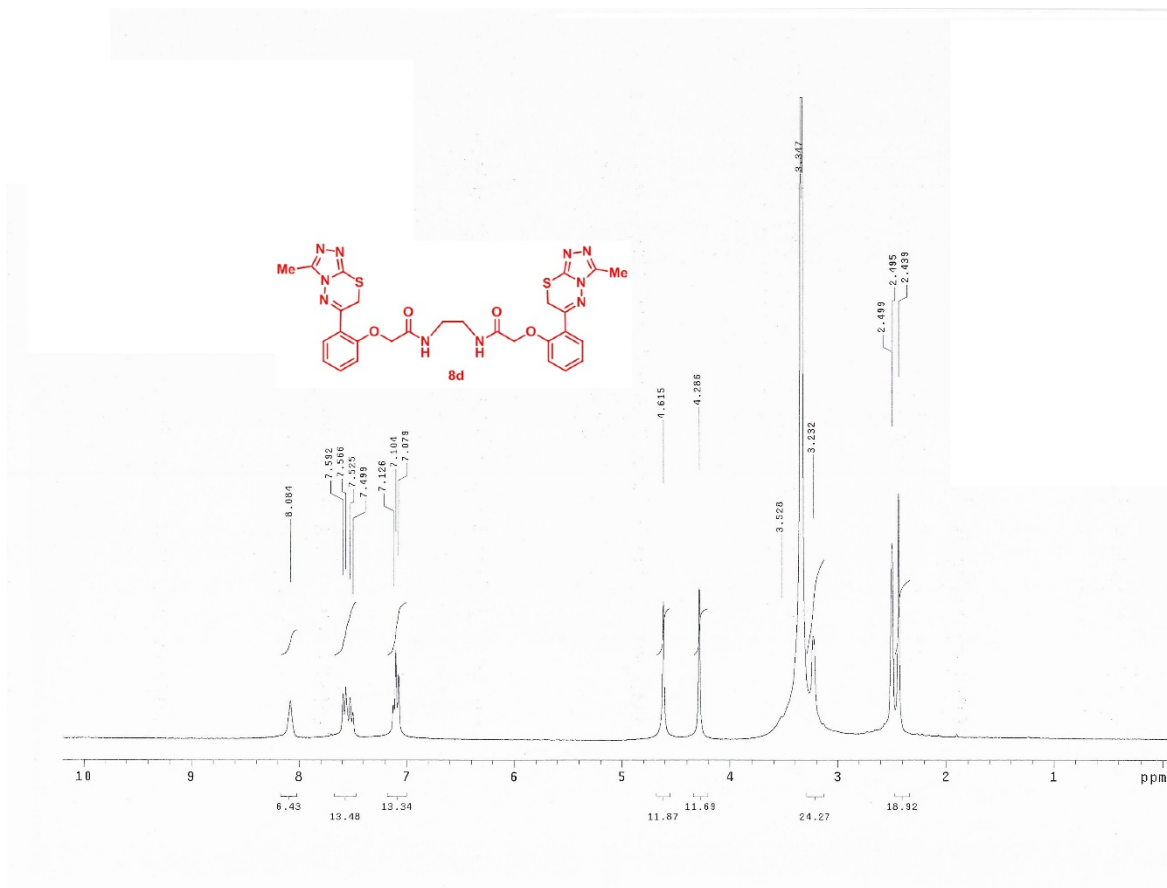

**<sup>1</sup>H NMR spectrum of 8d**

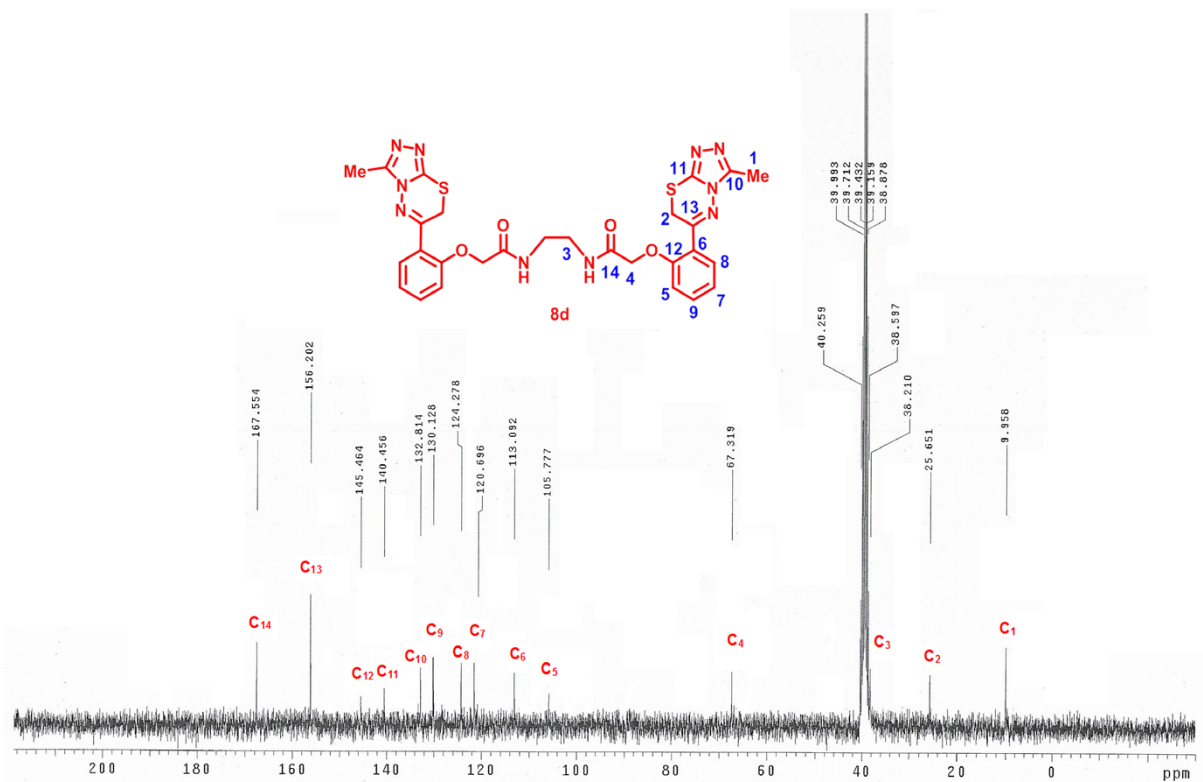

**<sup>13</sup>C NMR spectrum of 8d**

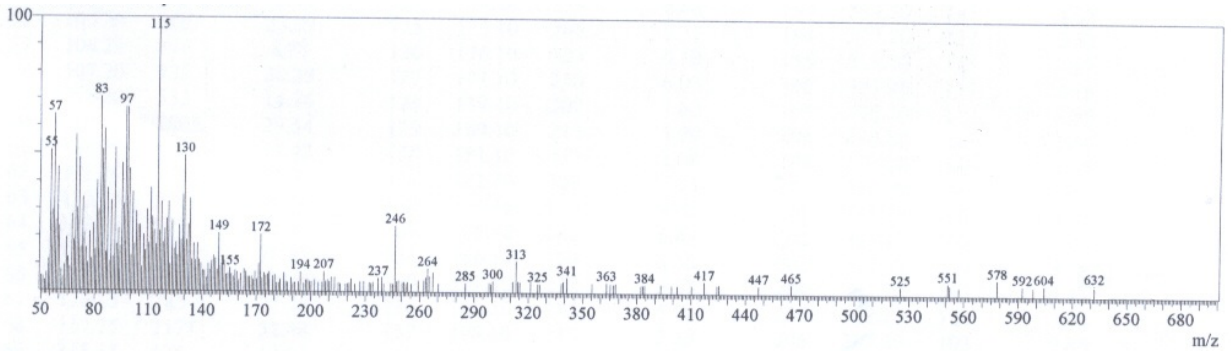

**Mass spectrum of 8d**

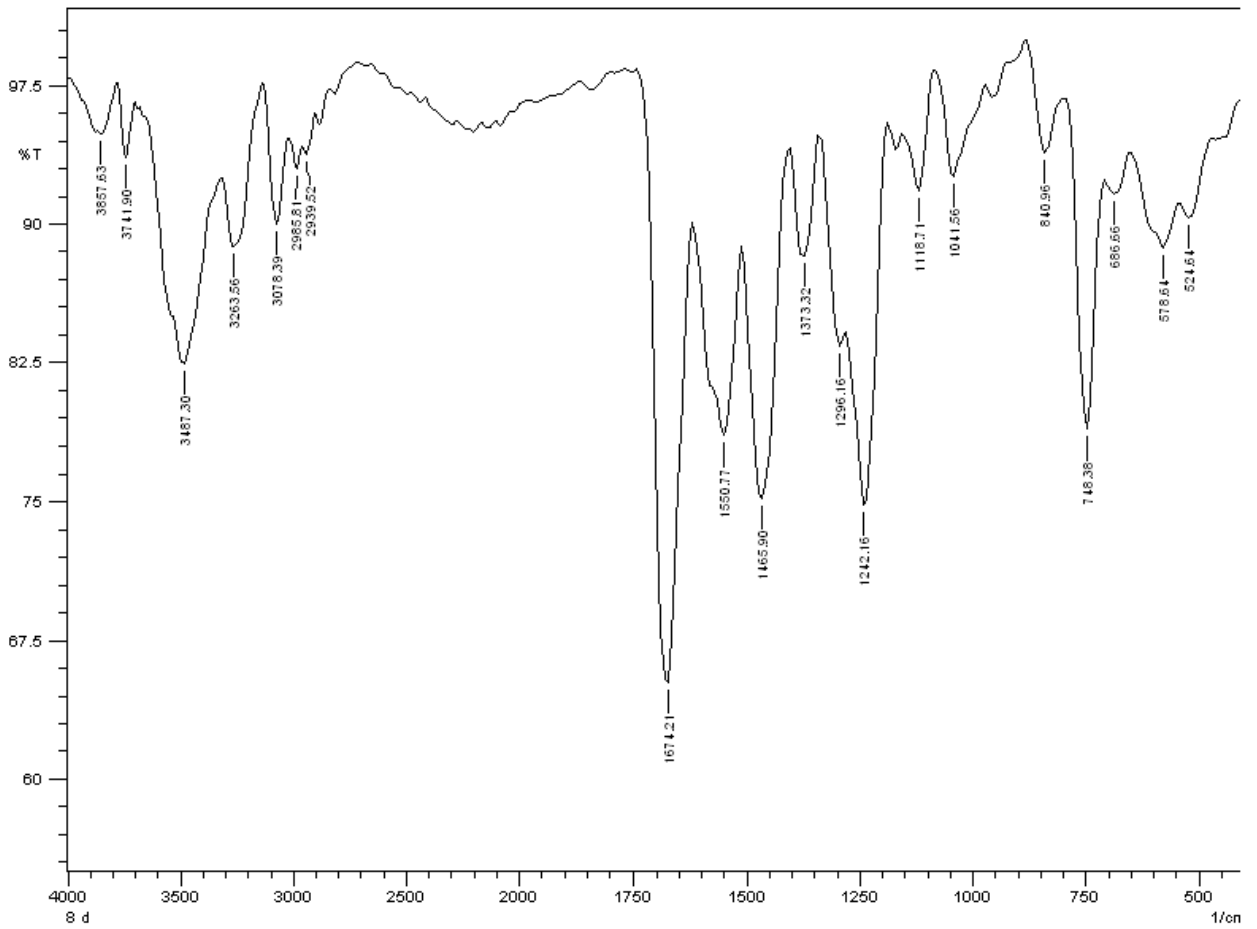

**IR spectrum of 8d**

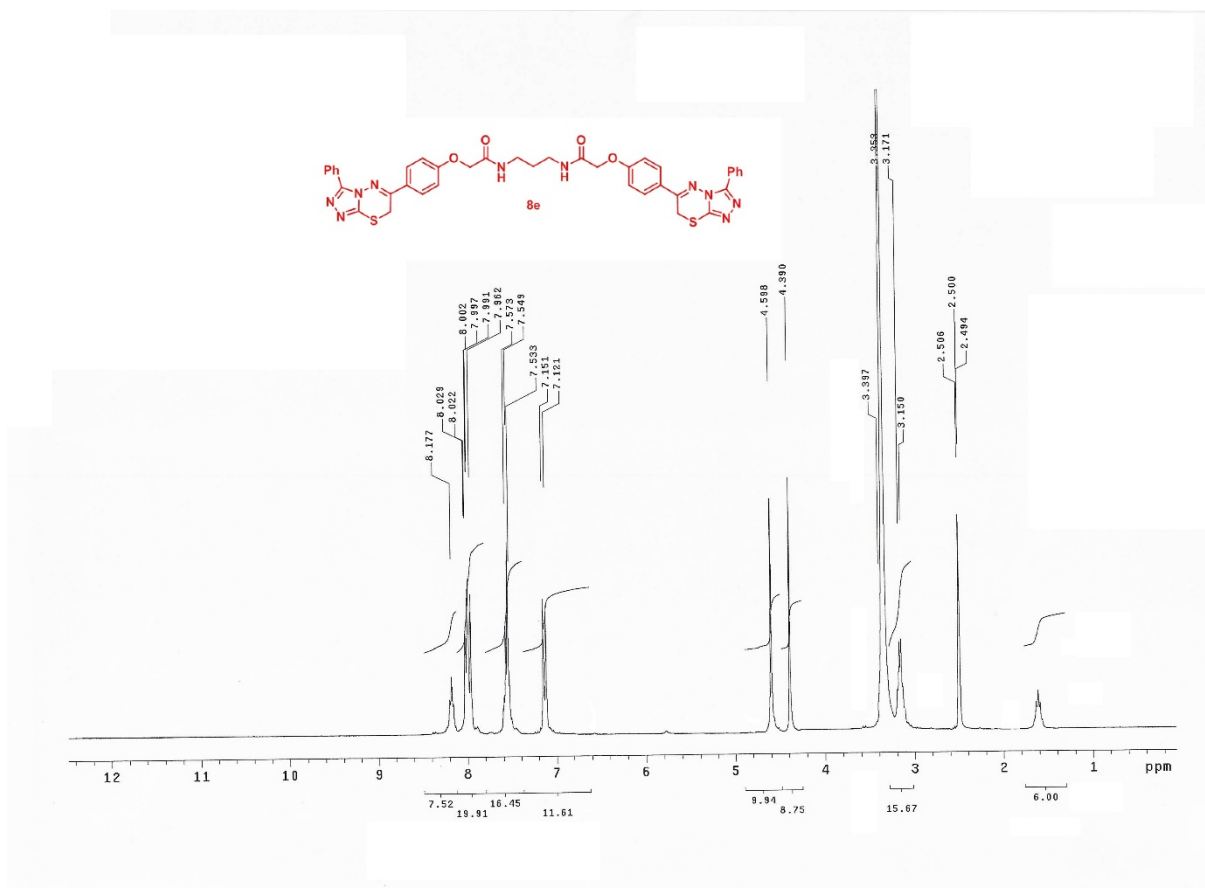

**<sup>1</sup>H NMR spectrum of 8e**

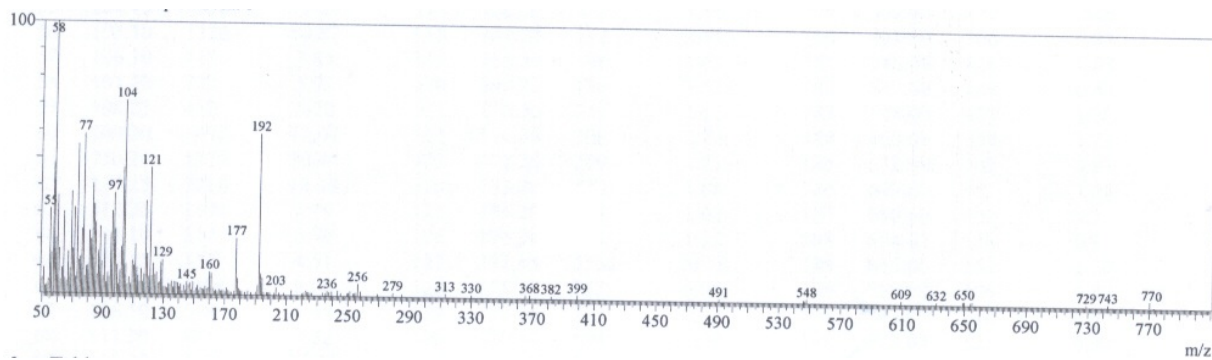

**Mass spectrum of 8e**

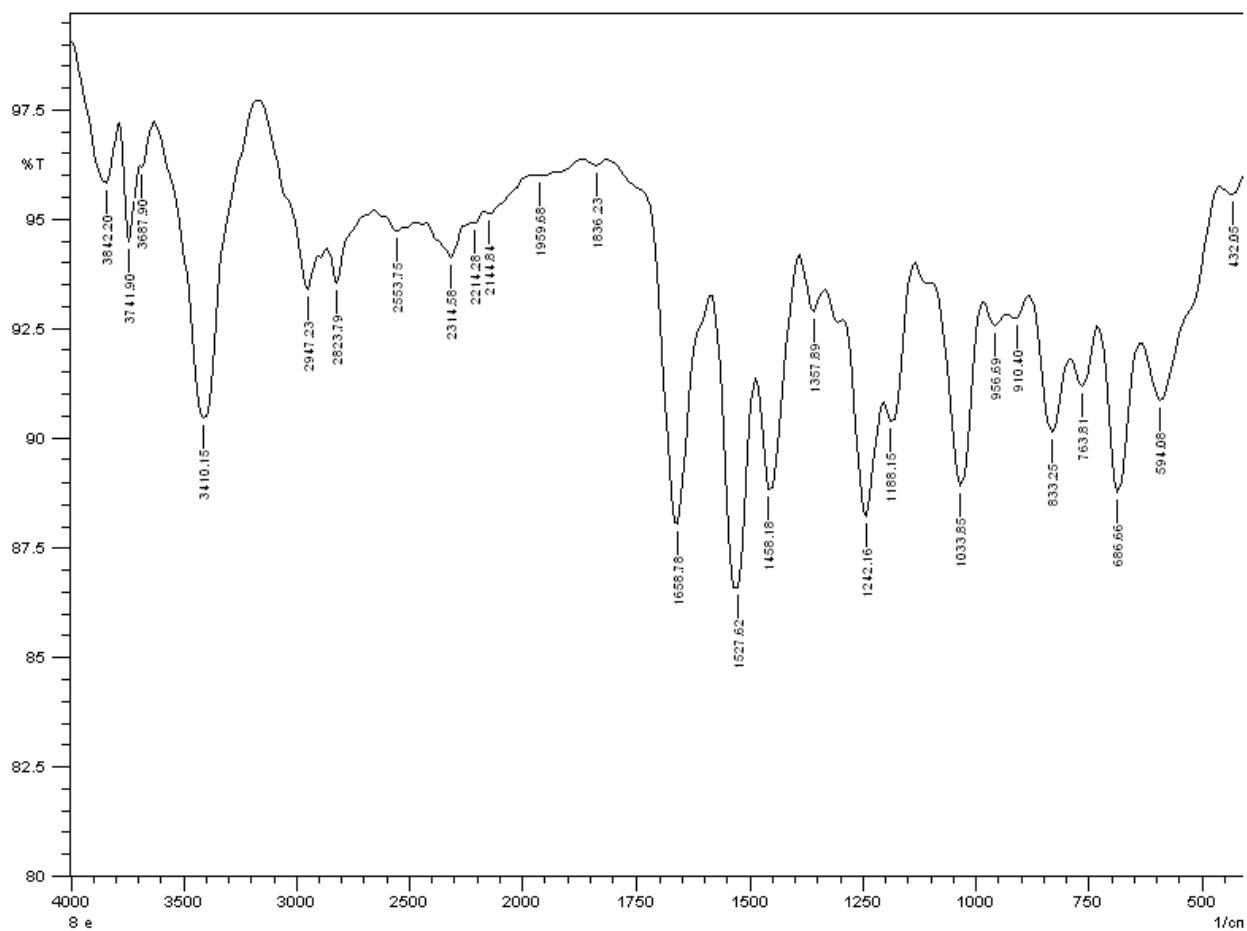

IR spectrum of 8e

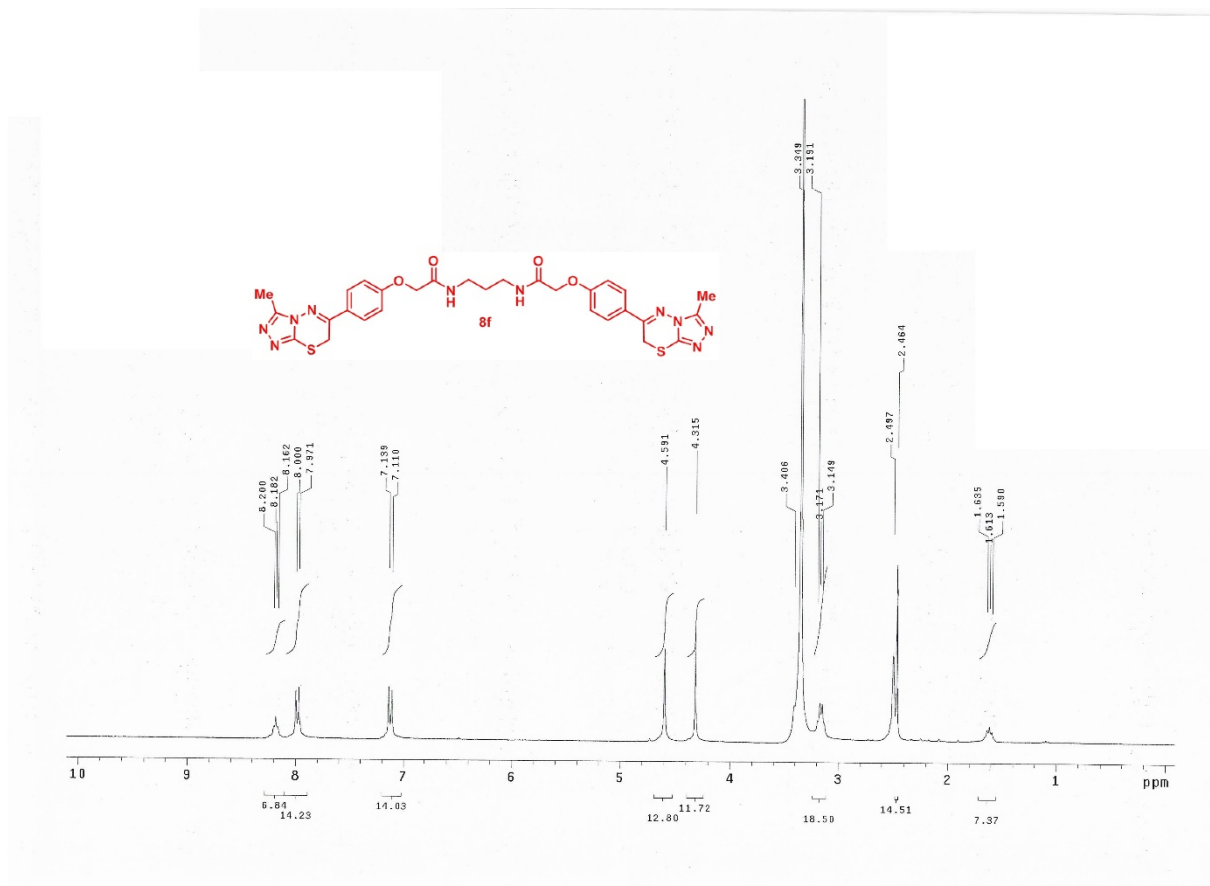

**<sup>1</sup>H NMR spectrum of 8f**

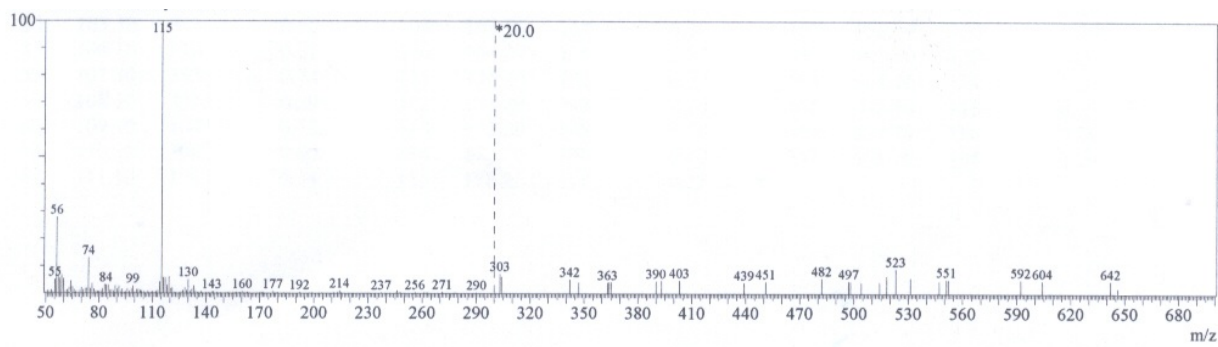

**Mass spectrum of 8f**

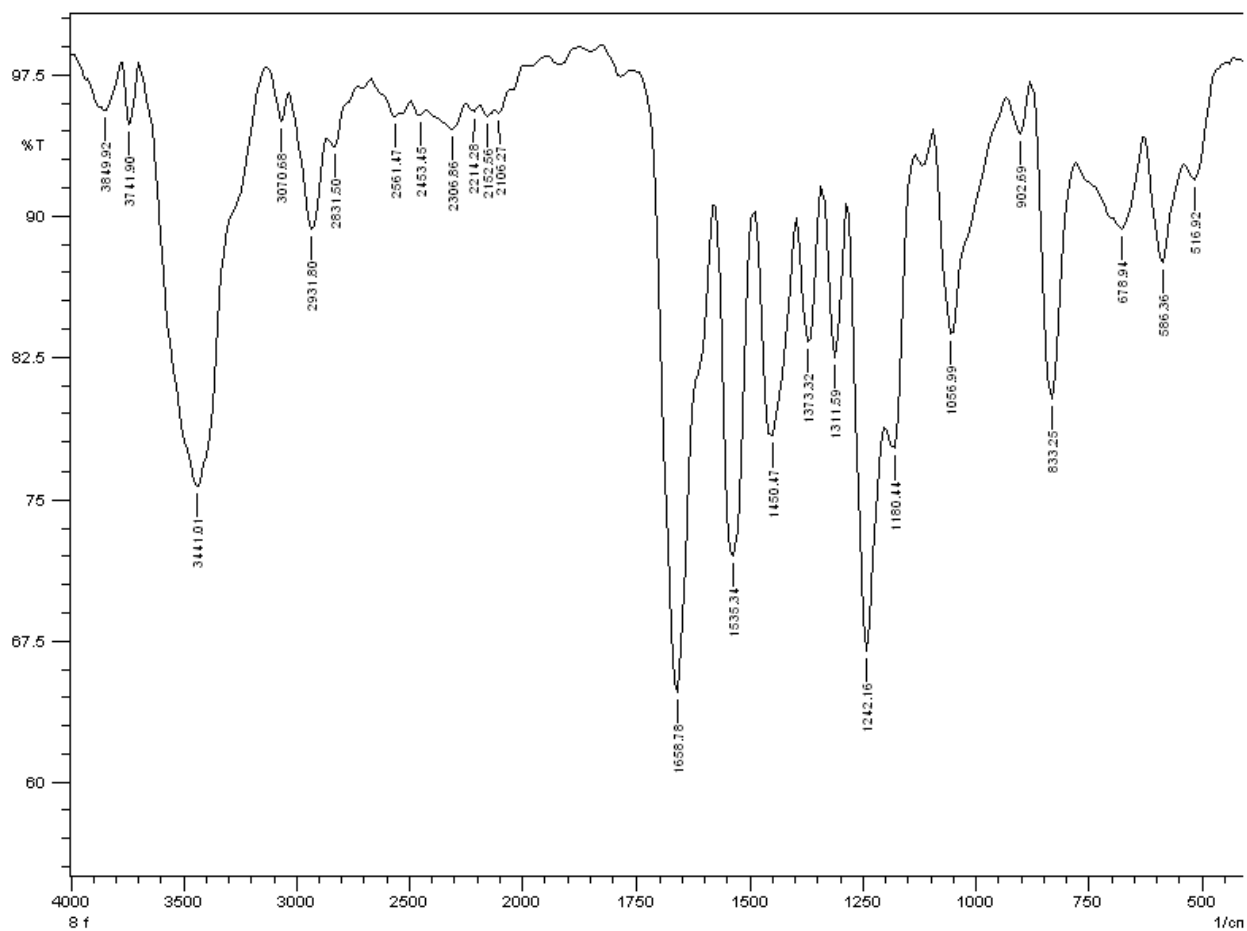

IR spectrum of 8f



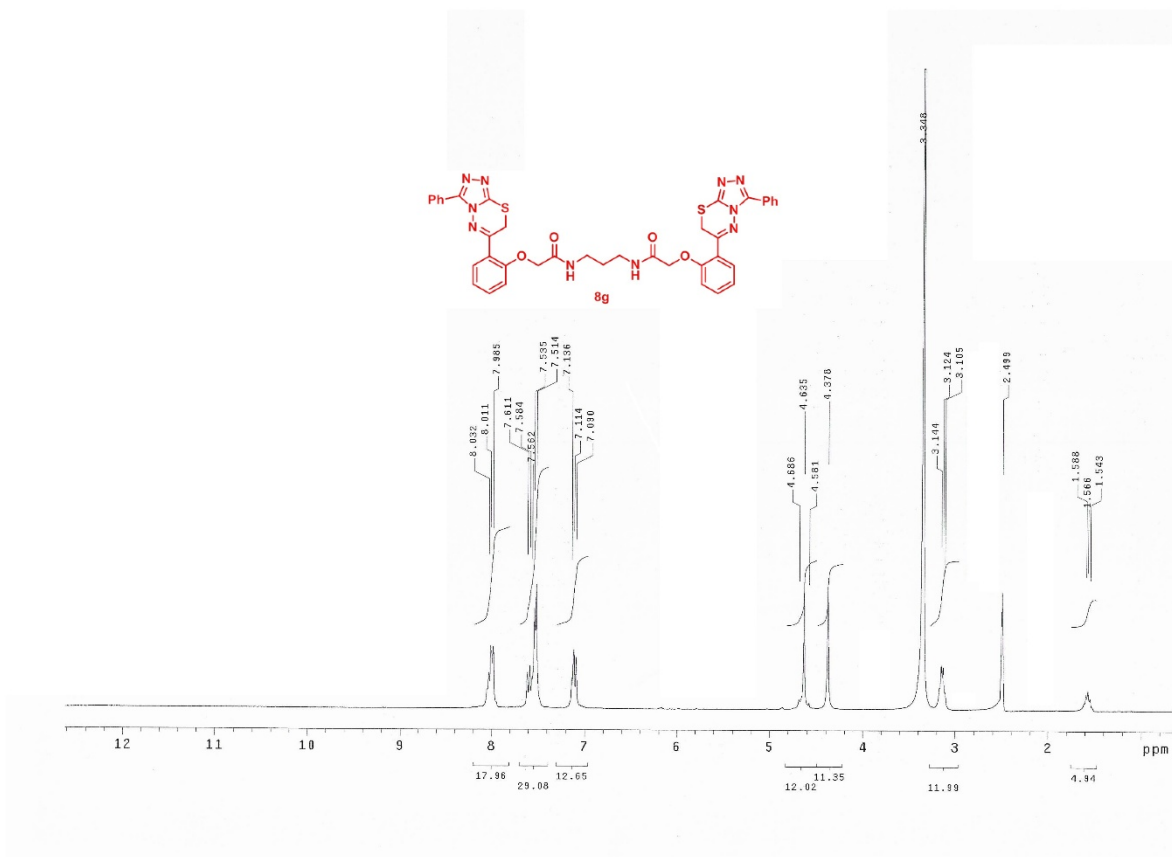

**<sup>1</sup>H NMR spectrum of 8g**

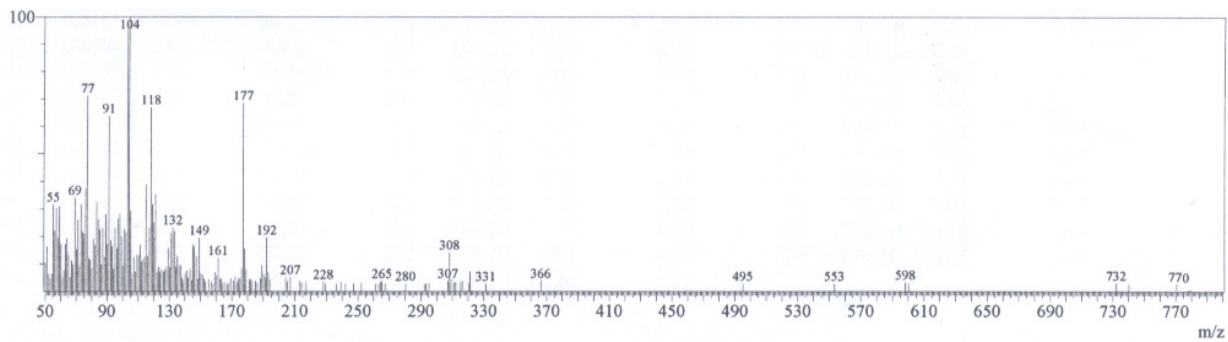

**Mass spectrum of 8g**

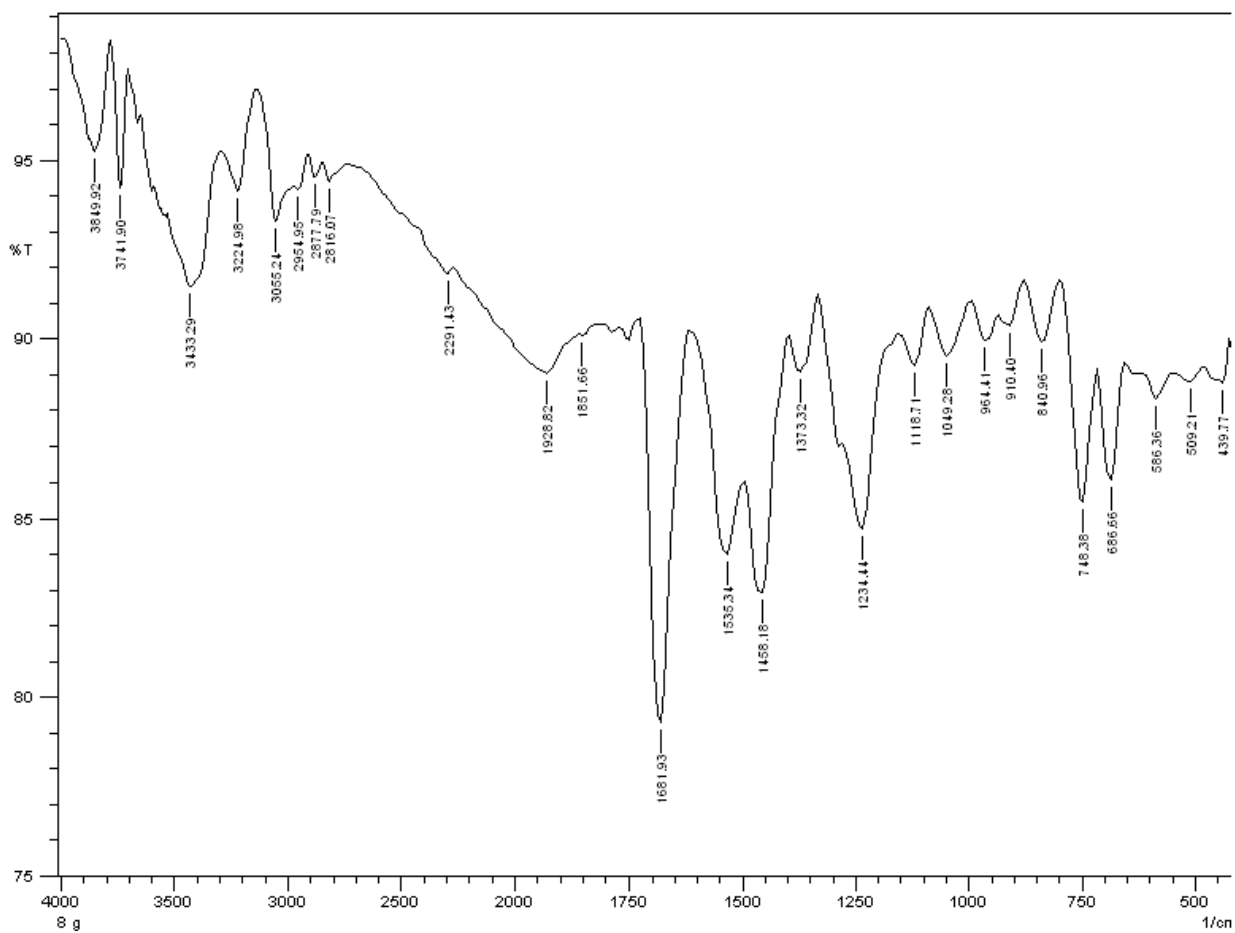

IR spectrum of 8g

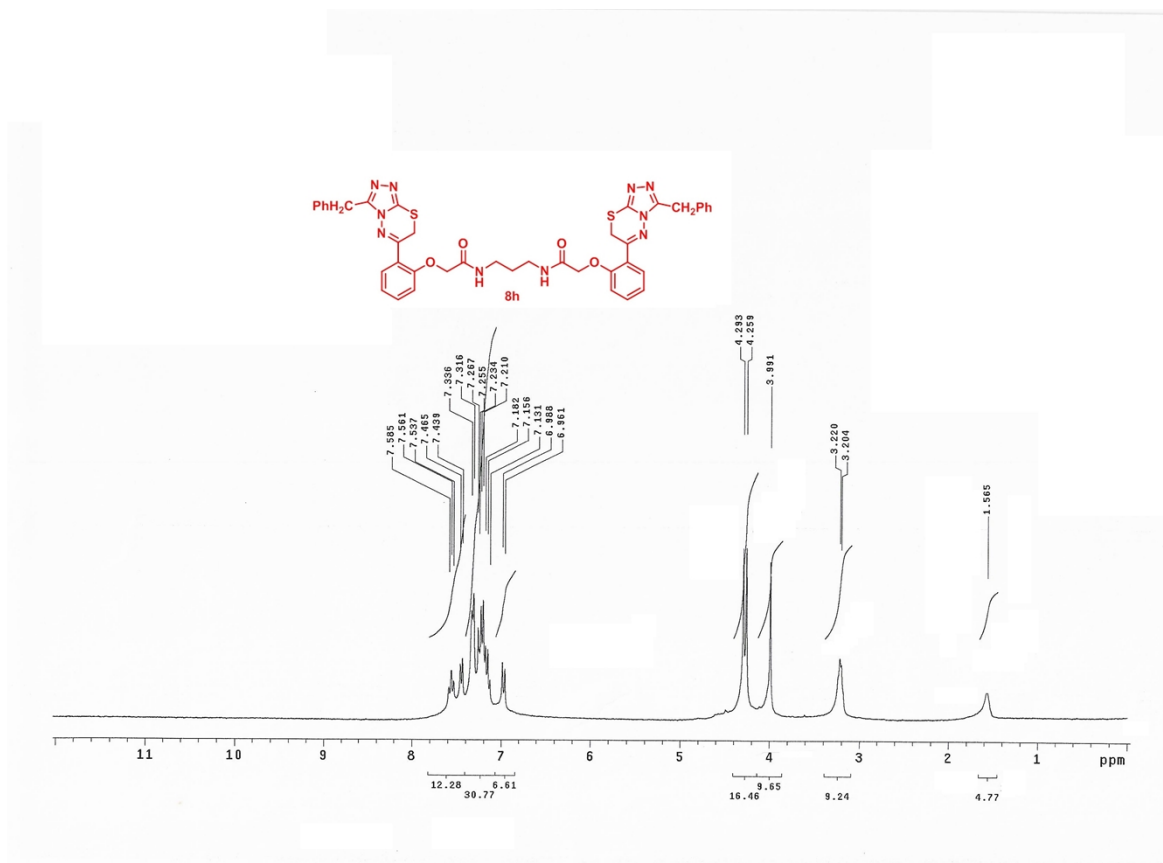

**<sup>1</sup>H NMR spectrum of 8h**

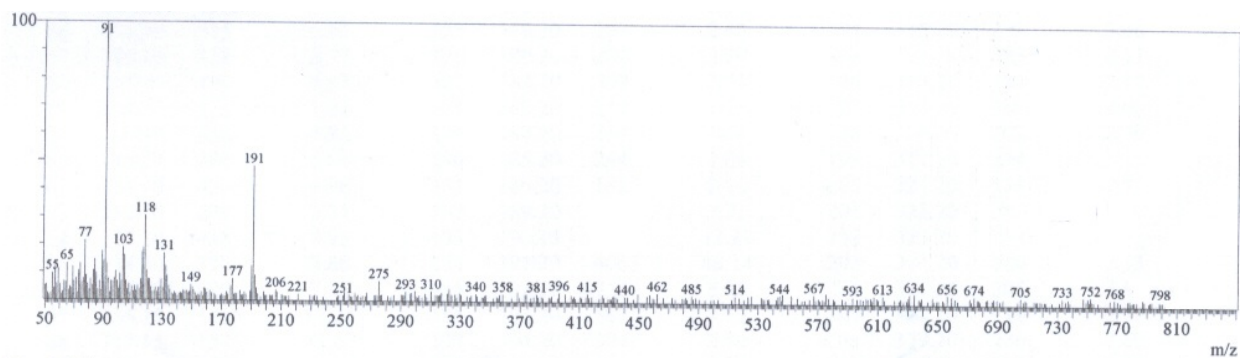

**Mass spectrum of 8h**

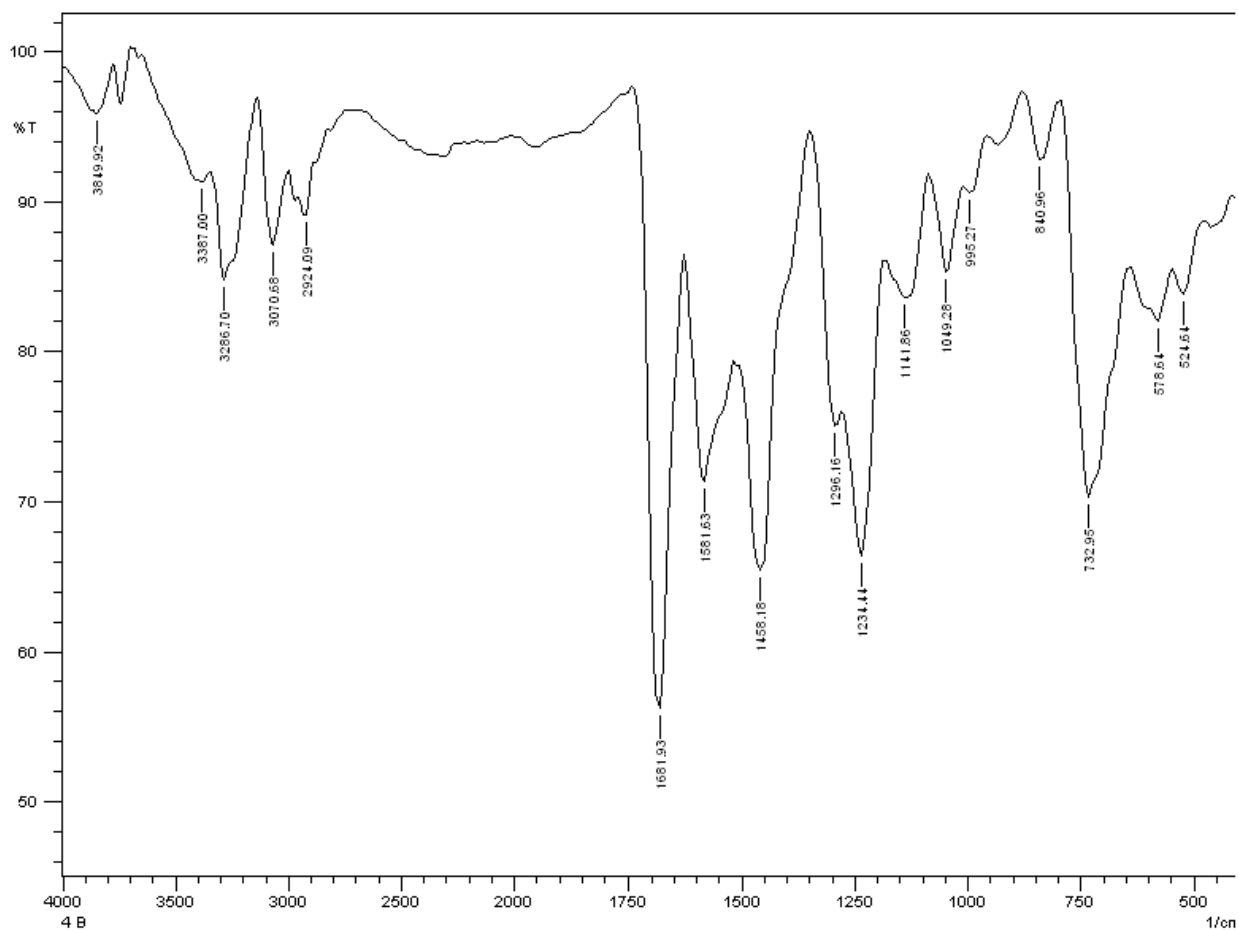

IR spectrum of 8h

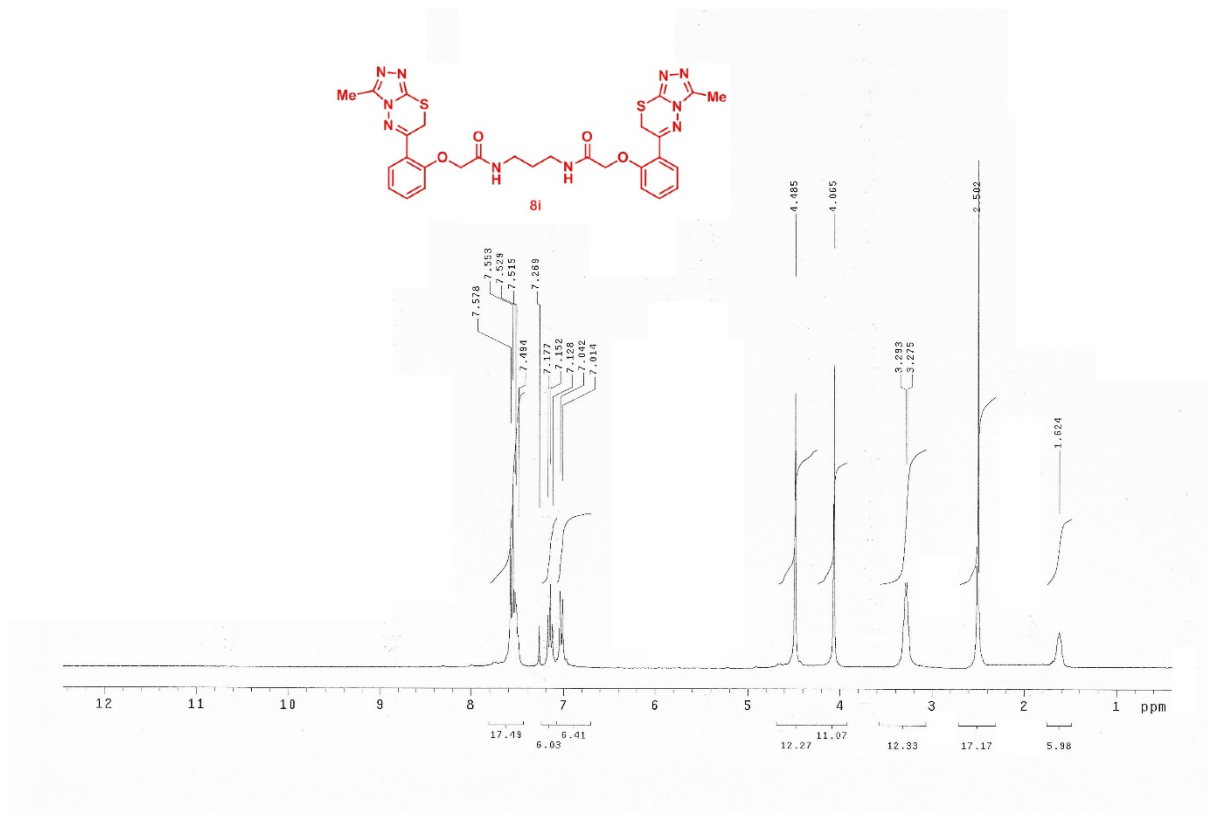

**<sup>1</sup>H NMR spectrum of 8i**

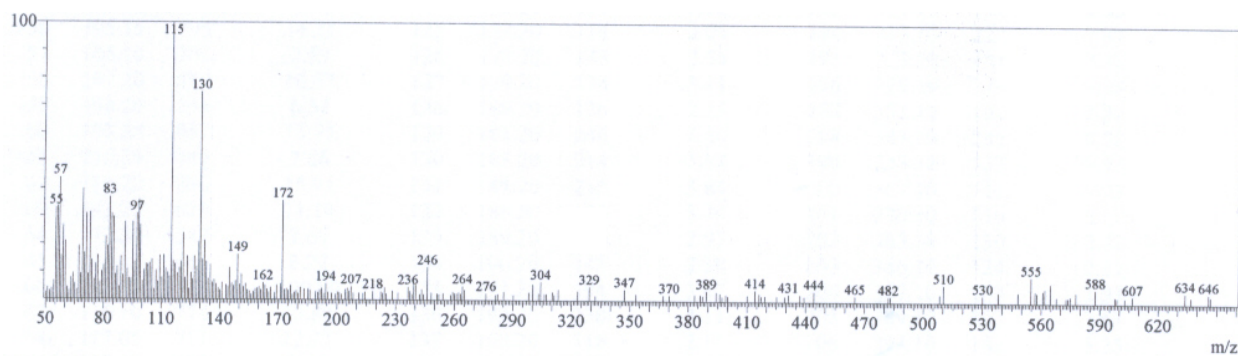

**Mass spectrum of 8i**

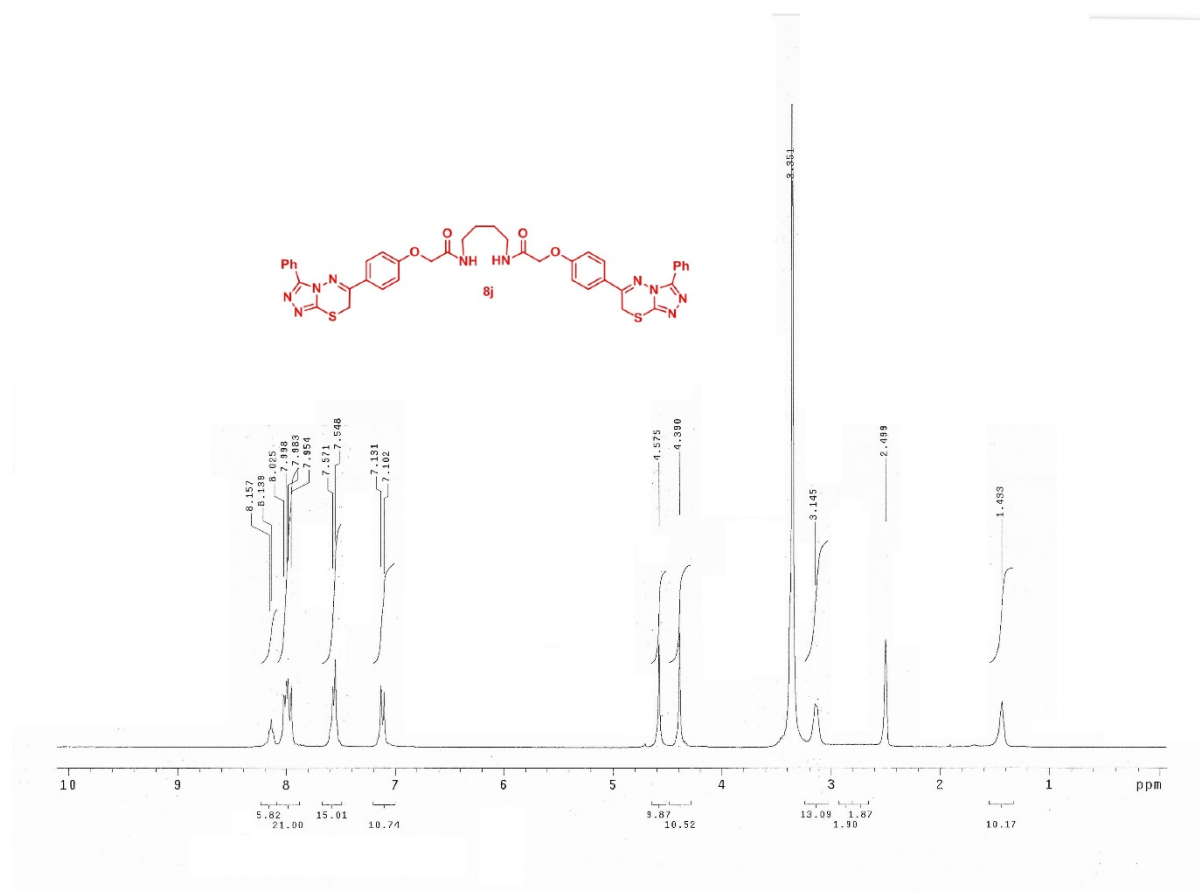

**<sup>1</sup>H NMR spectrum of 8j**

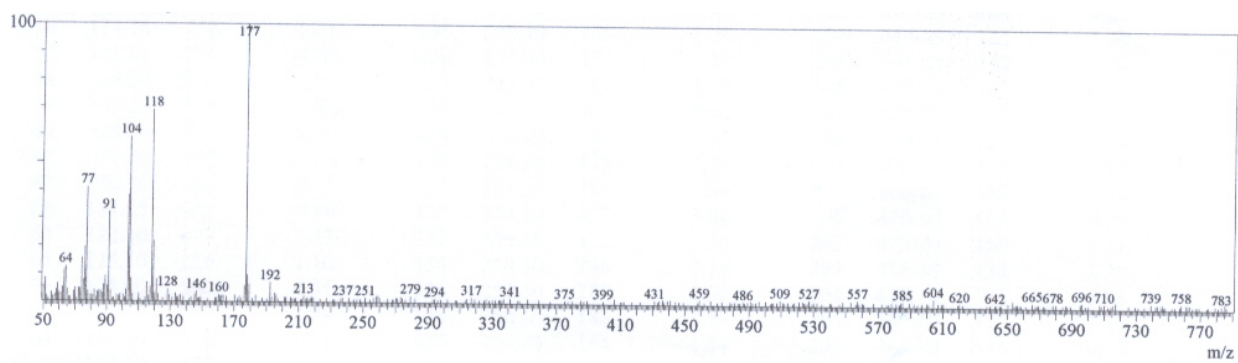

**Mass spectrum of 8j**

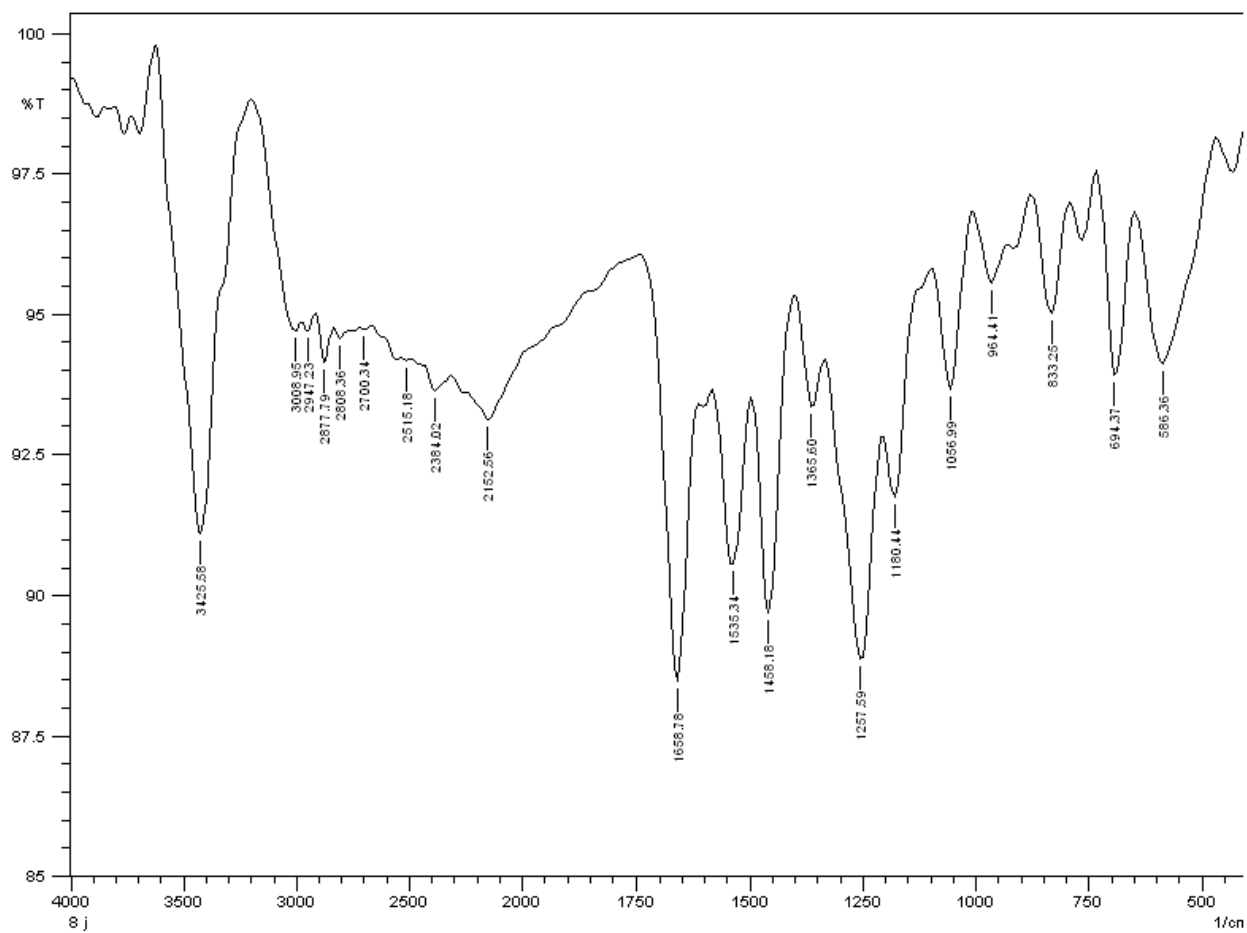

IR spectrum of 8j

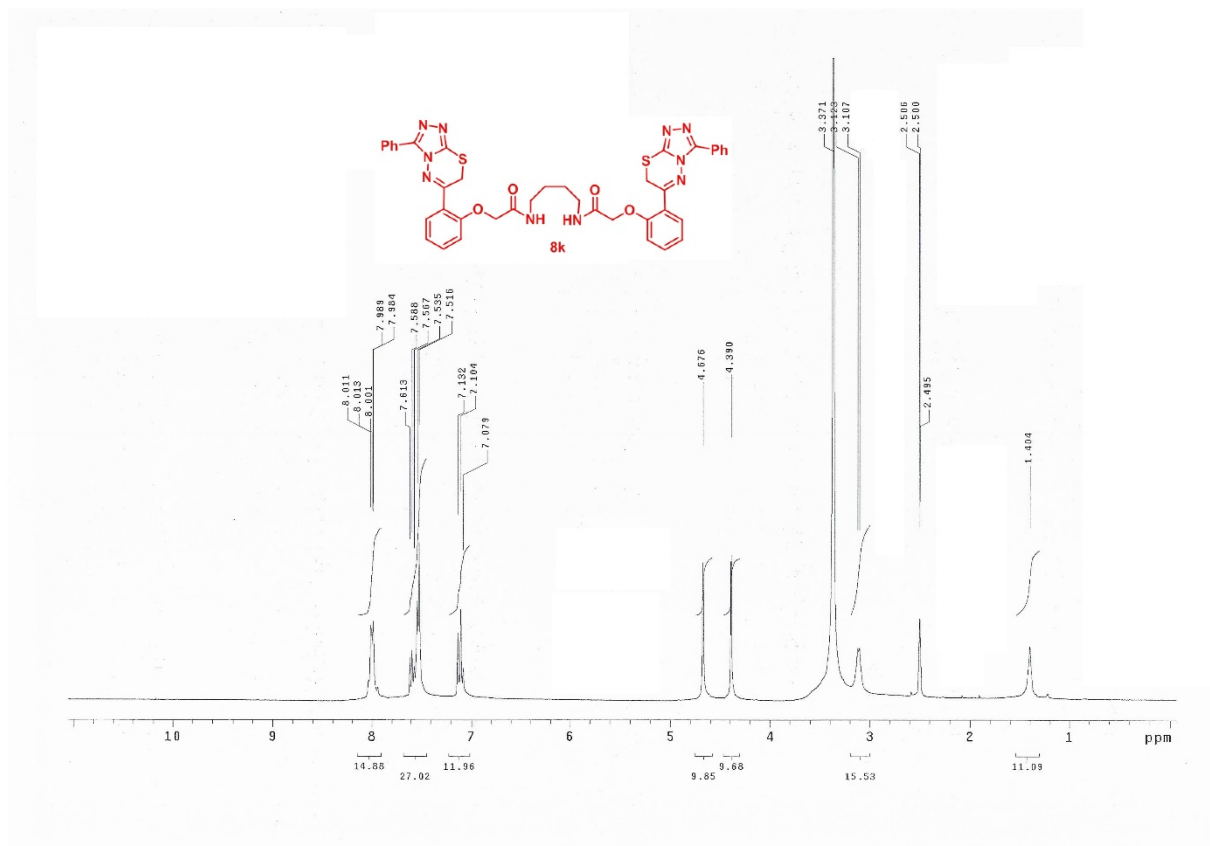

**<sup>1</sup>H NMR spectrum of 8k**

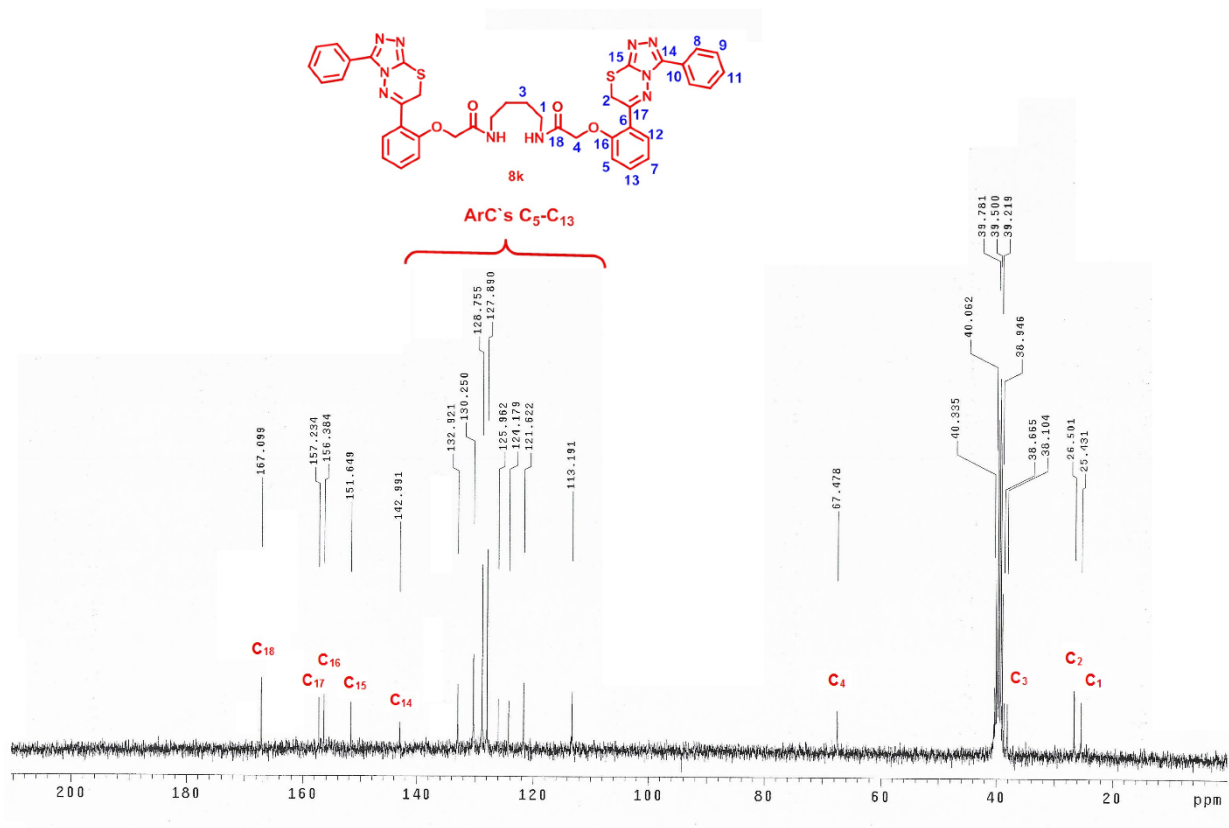

**<sup>13</sup>C NMR spectrum of 8k**



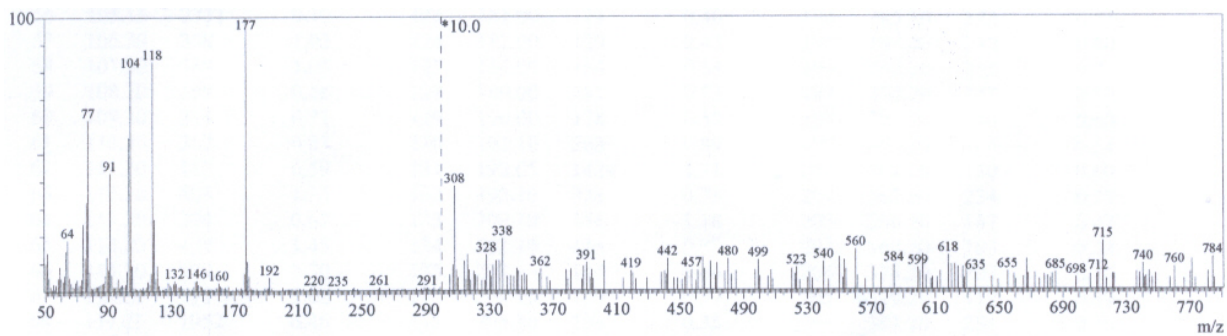

Mass spectrum of 8k

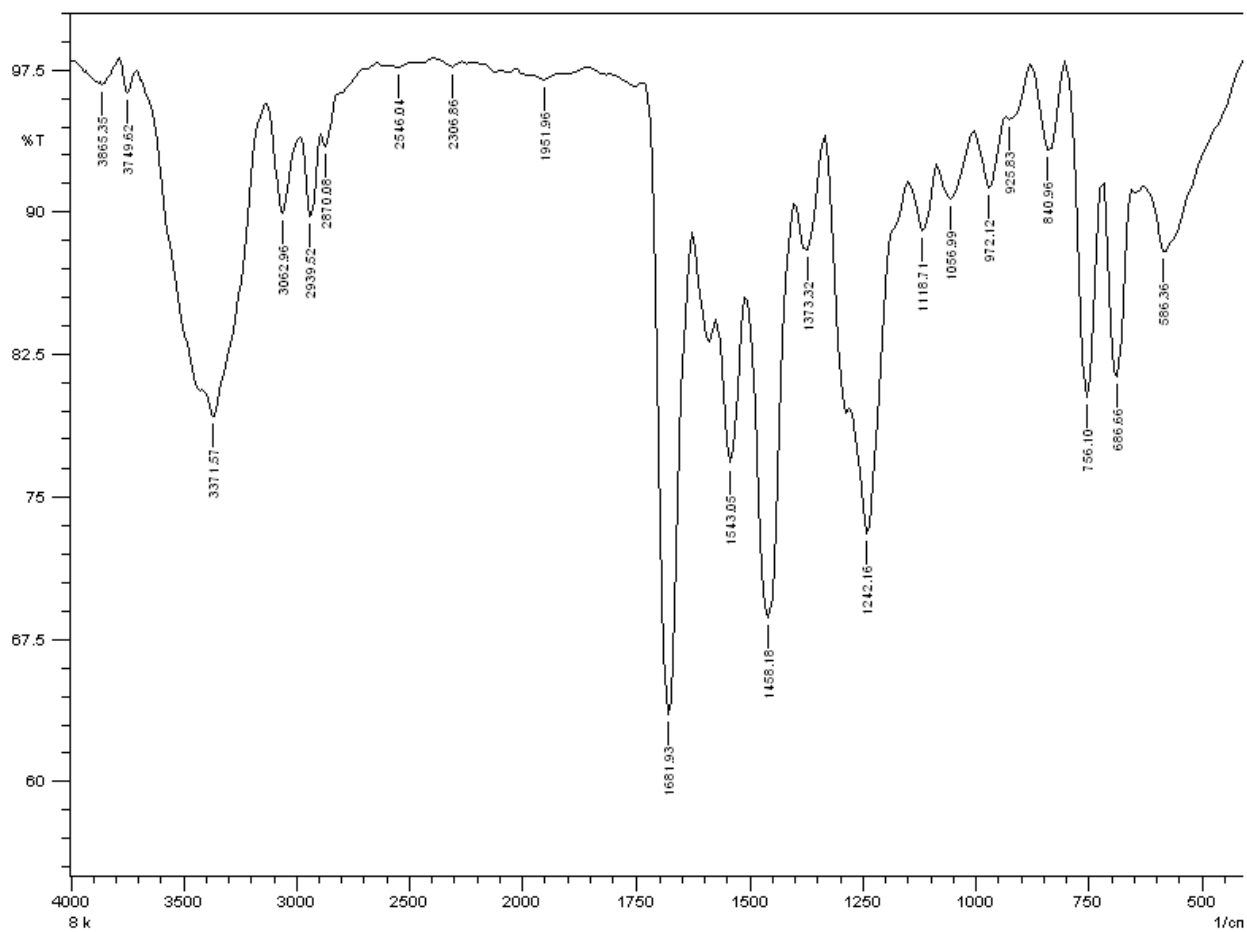

IR spectrum of 8k

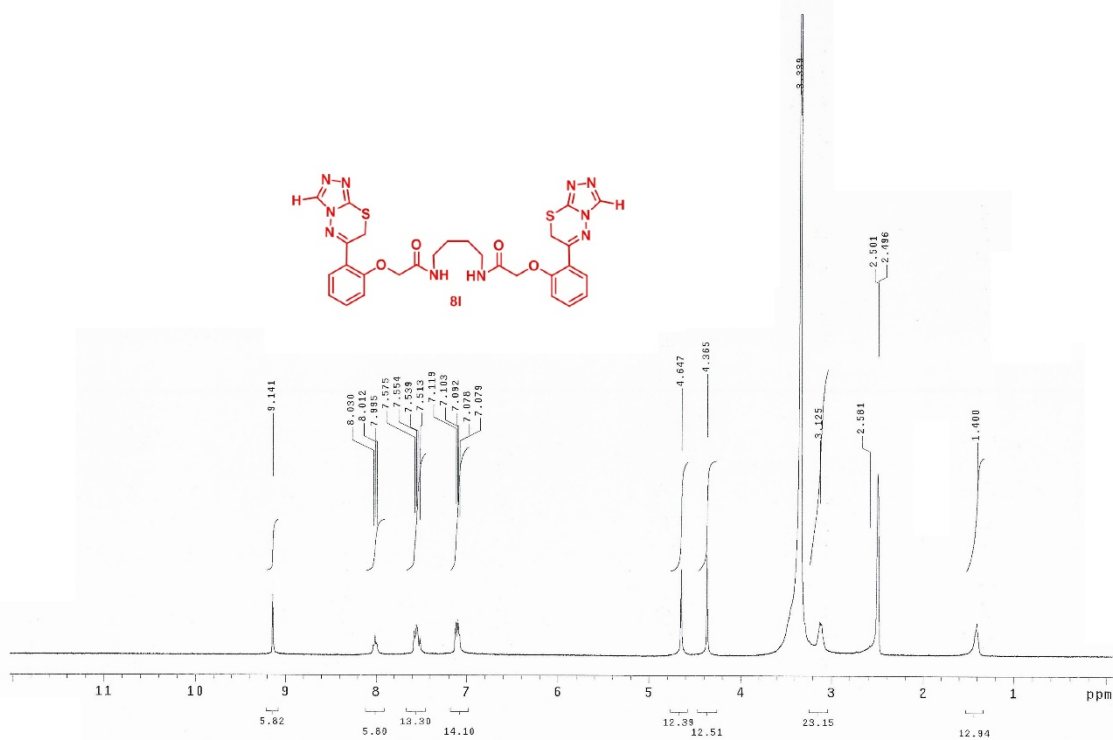

**<sup>1</sup>H NMR spectrum of 8I**

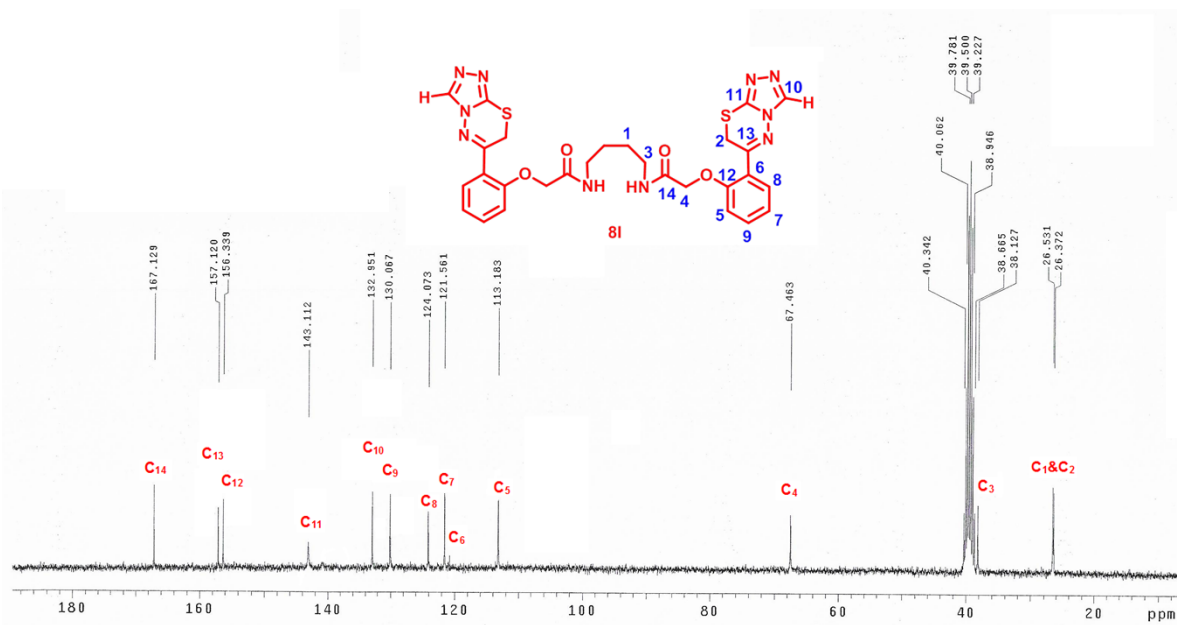

**<sup>13</sup>C NMR spectrum of 8I**

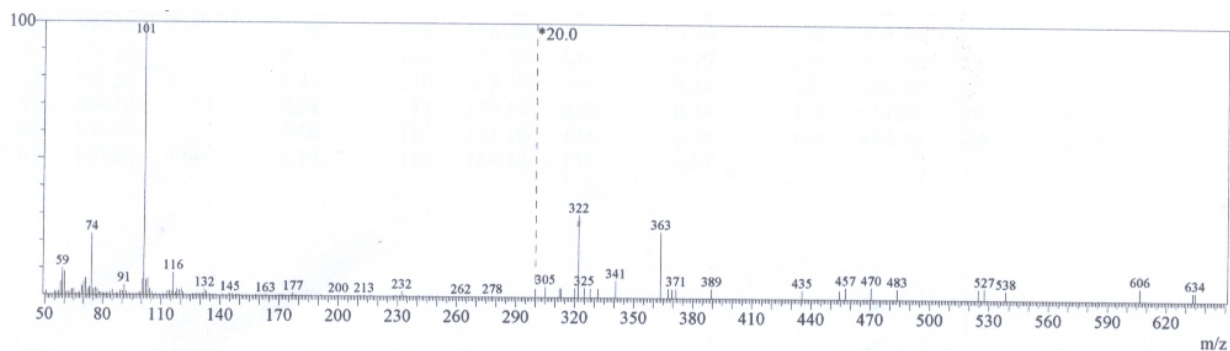

**Mass spectrum of 8l**

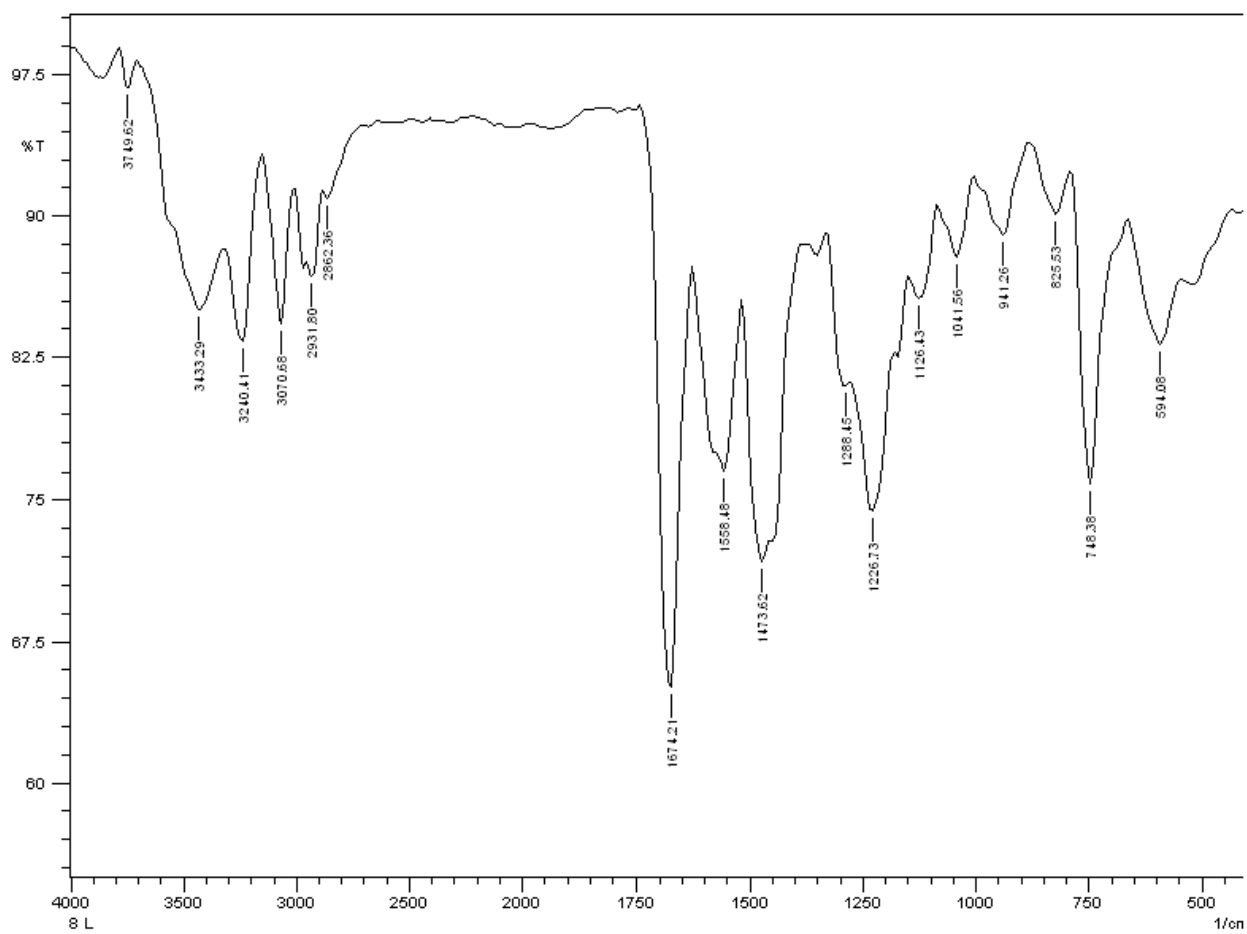

**IR spectrum of 8l**

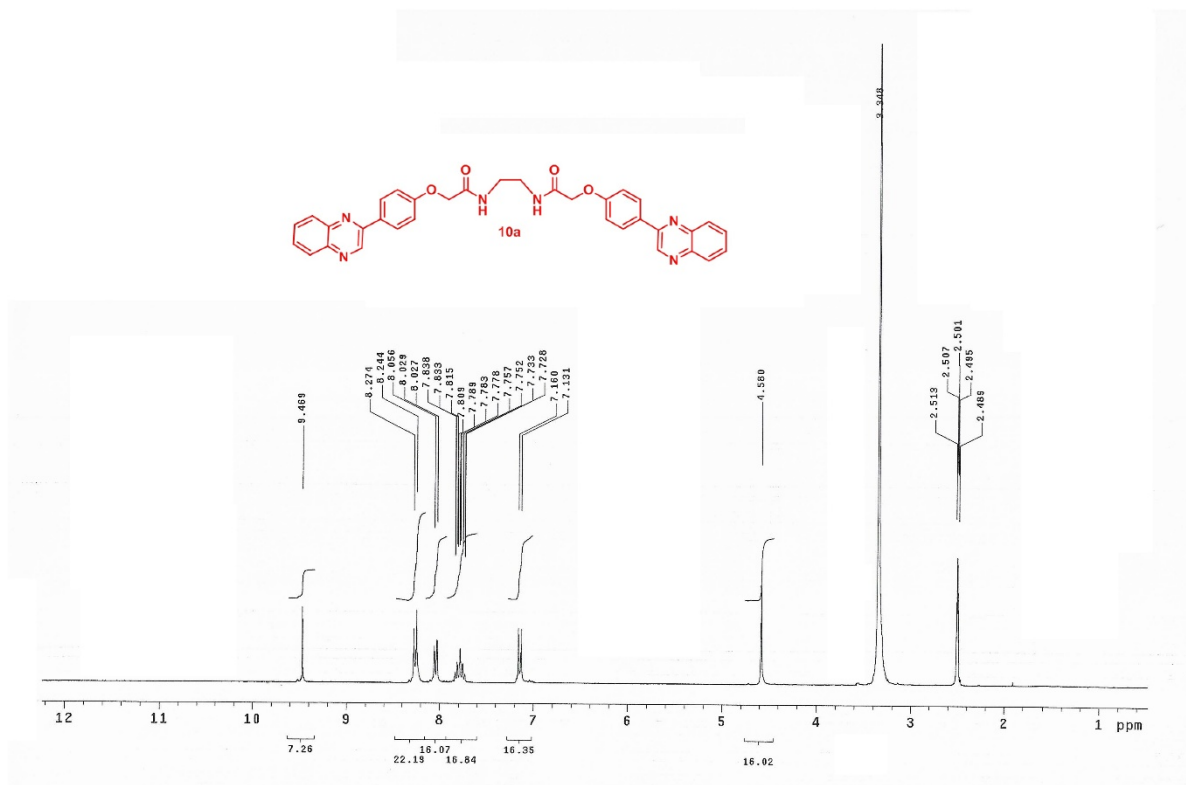

**<sup>1</sup>H NMR spectrum of 10a**

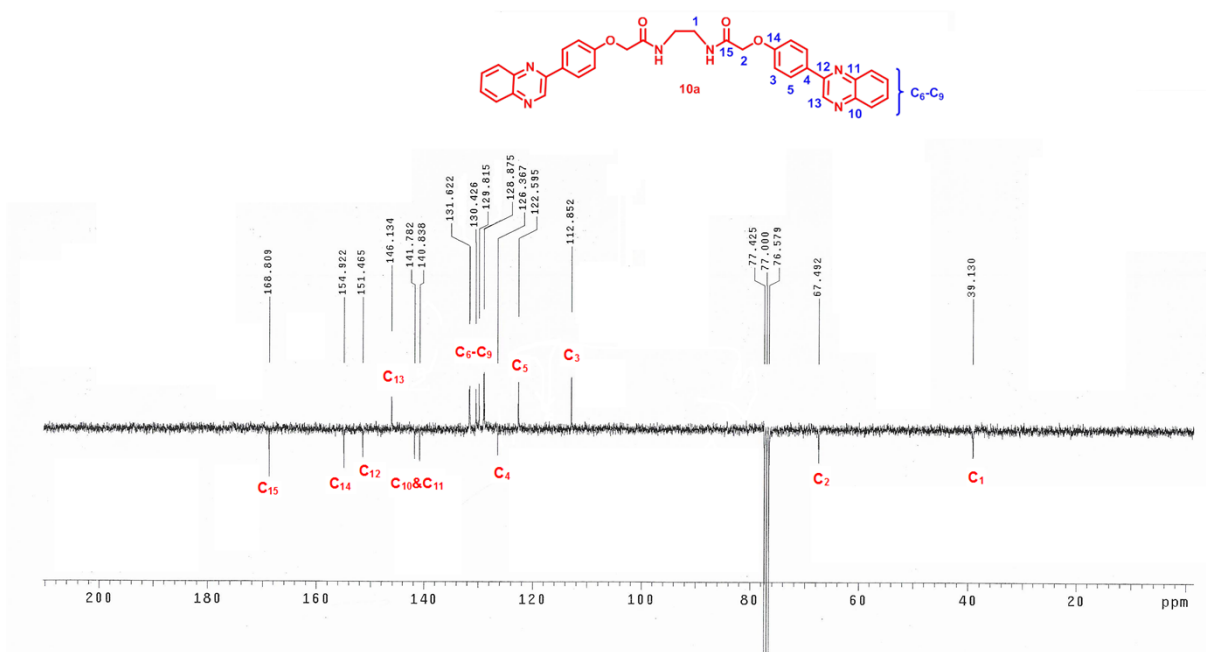

**<sup>13</sup>C NMR spectrum of 10a (APT)**

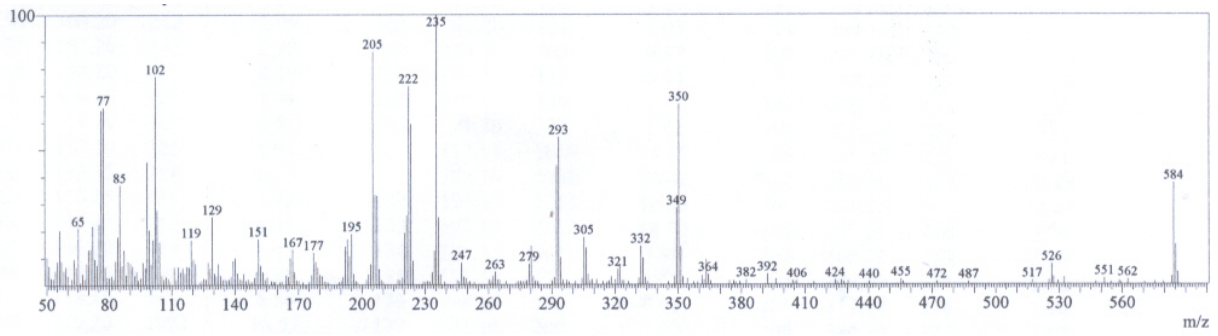

**Mass spectrum of 10a**

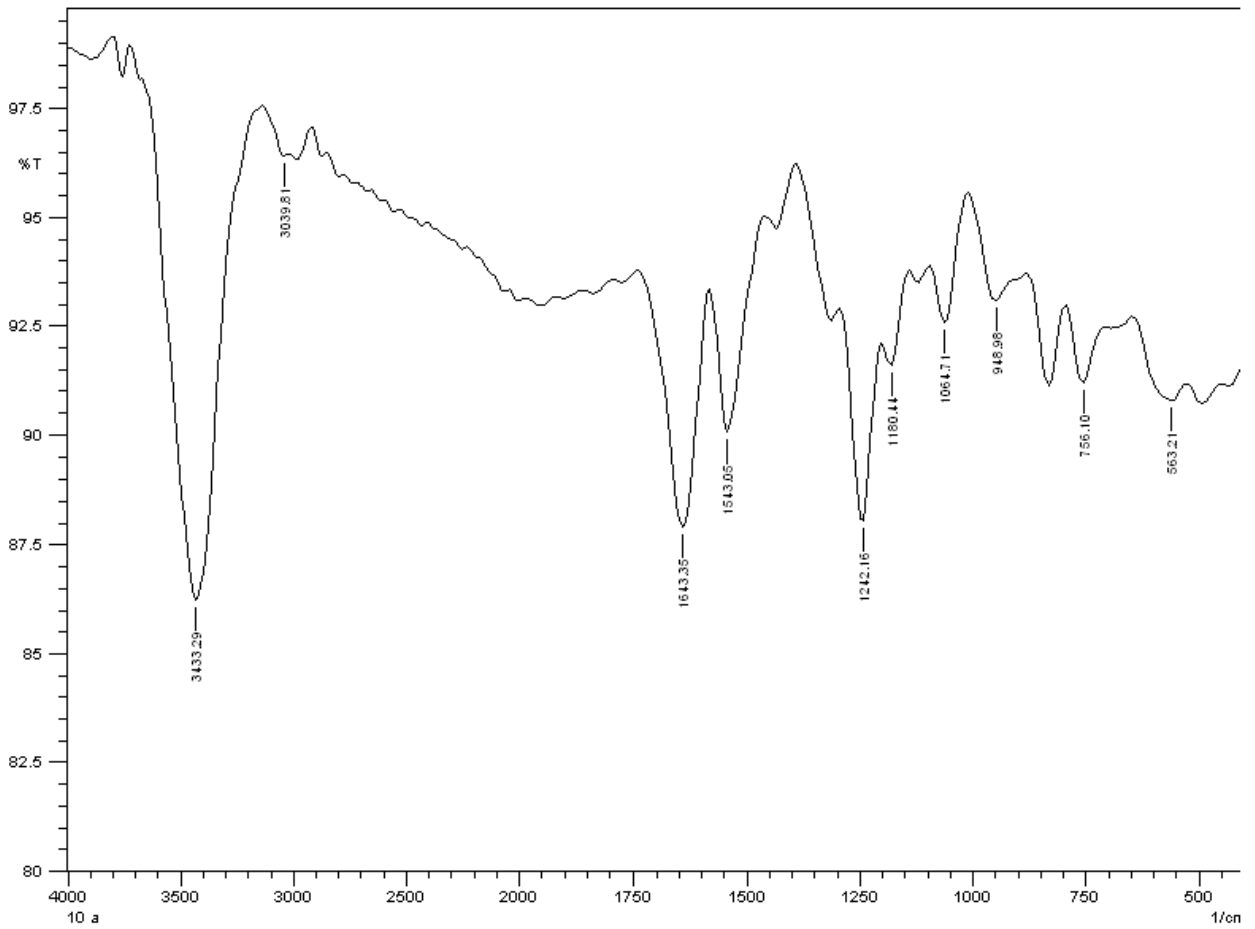

**IR spectrum of 10a**

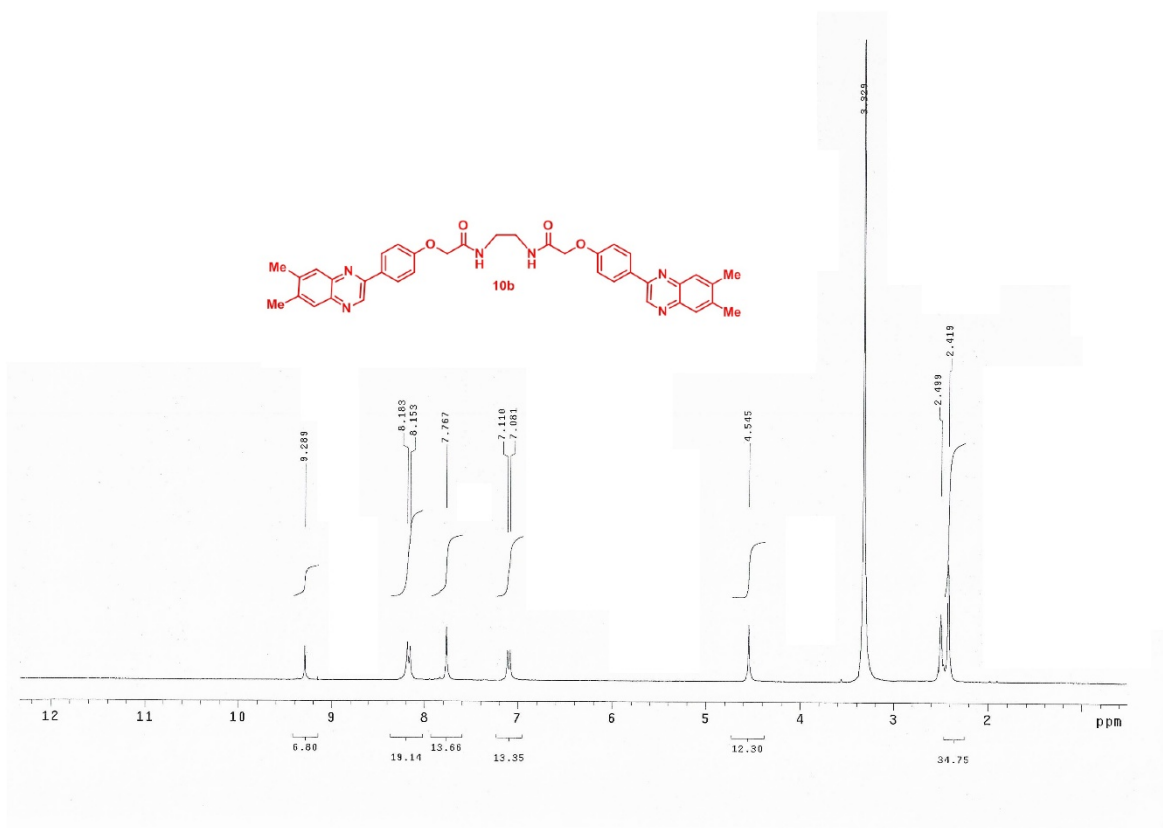

**<sup>1</sup>H NMR spectrum of 10b**

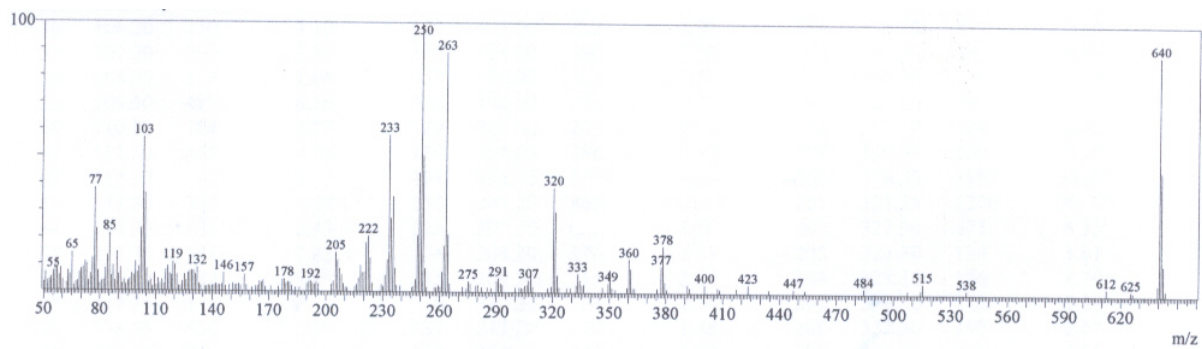

**Mass spectrum of 10b**

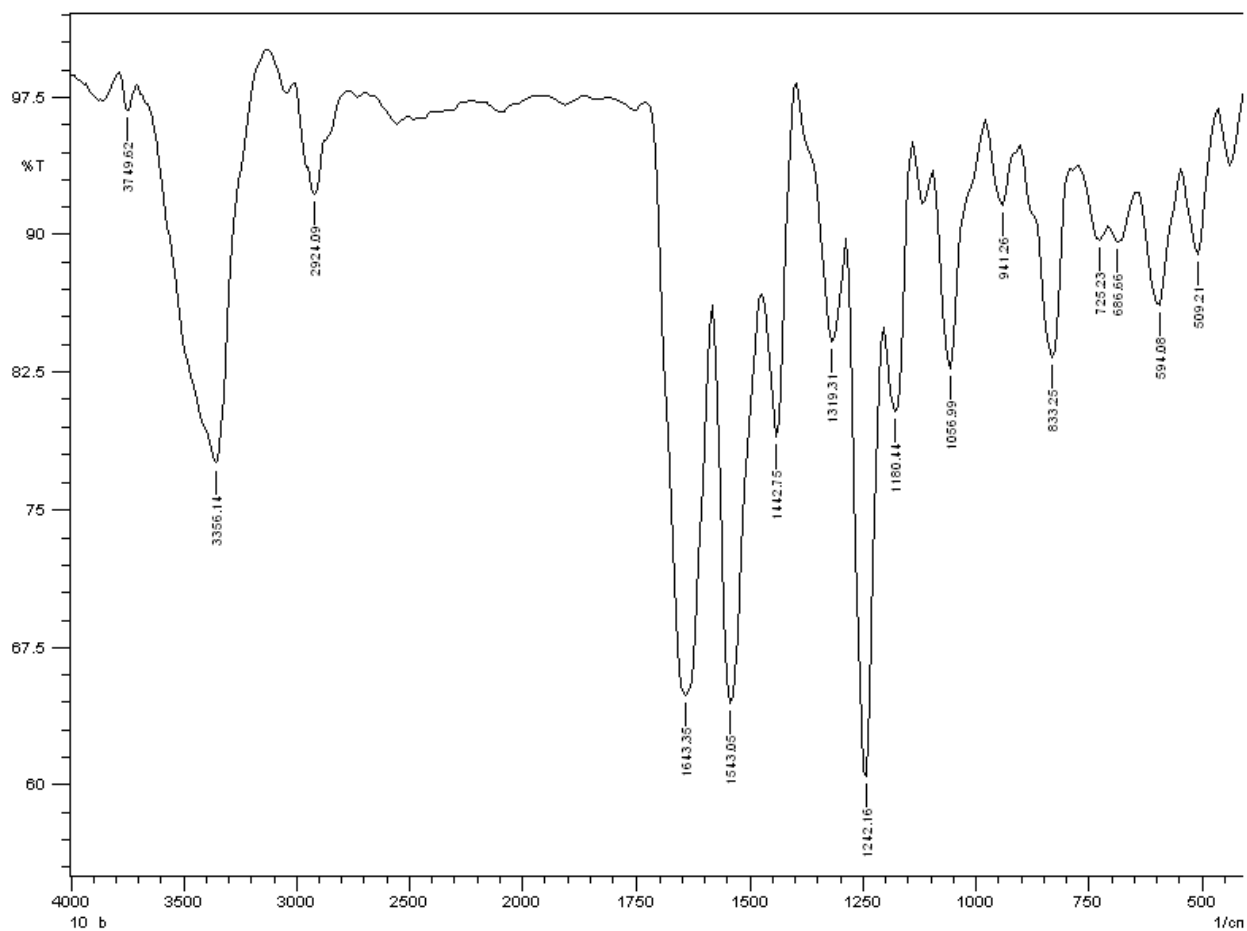

**IR spectrum of 10b**

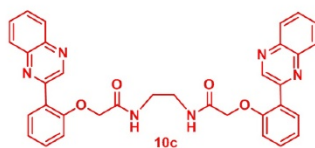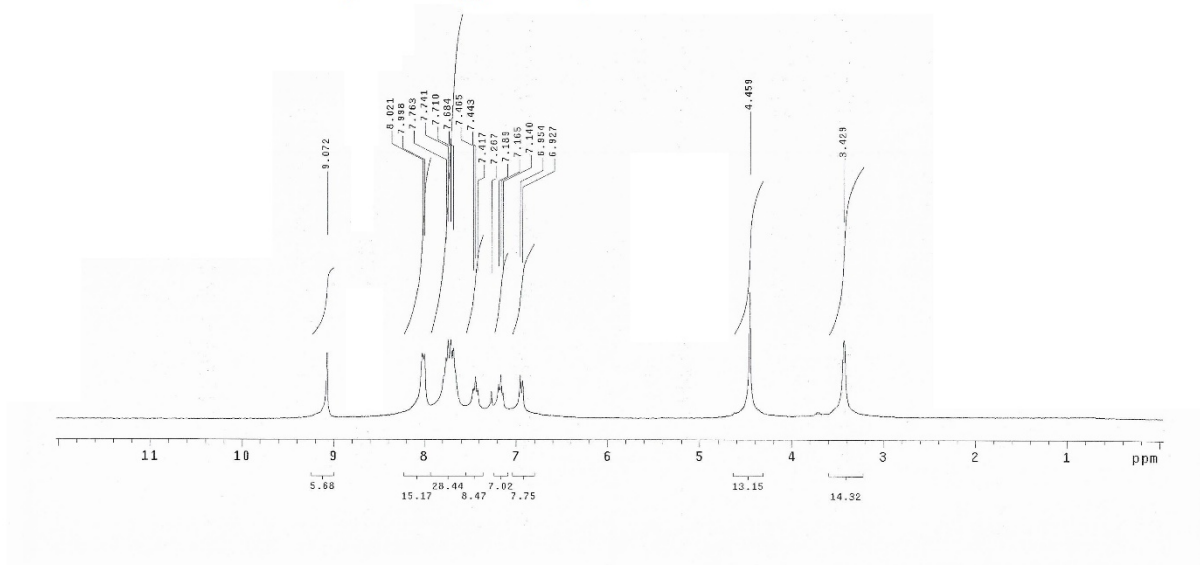

**<sup>1</sup>H NMR spectrum of 10c**

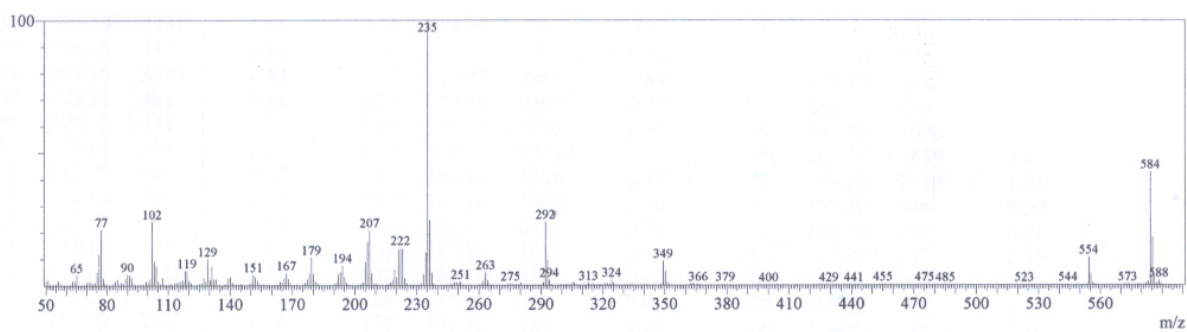

**Mass spectrum of 10c**



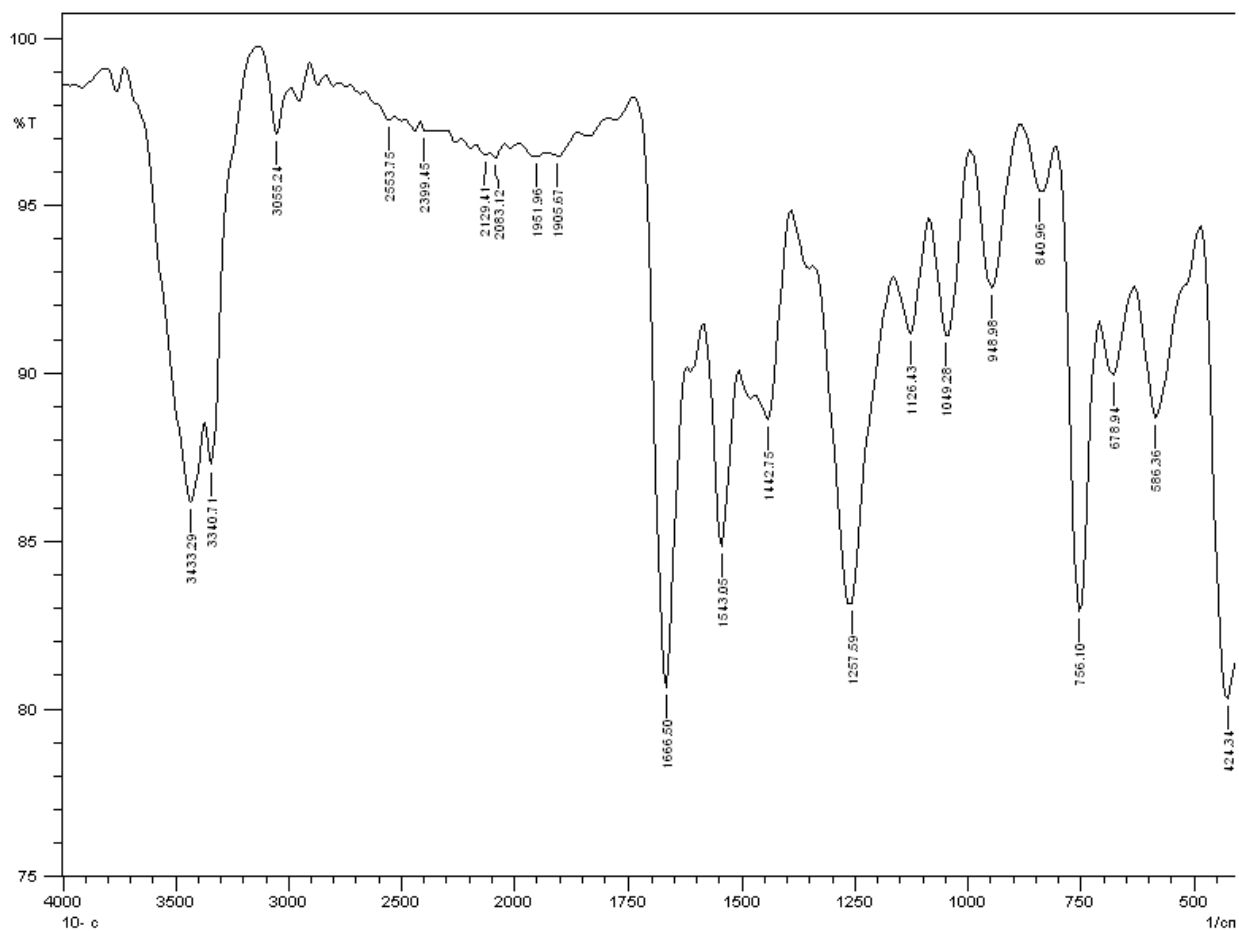

IR spectrum of 10c

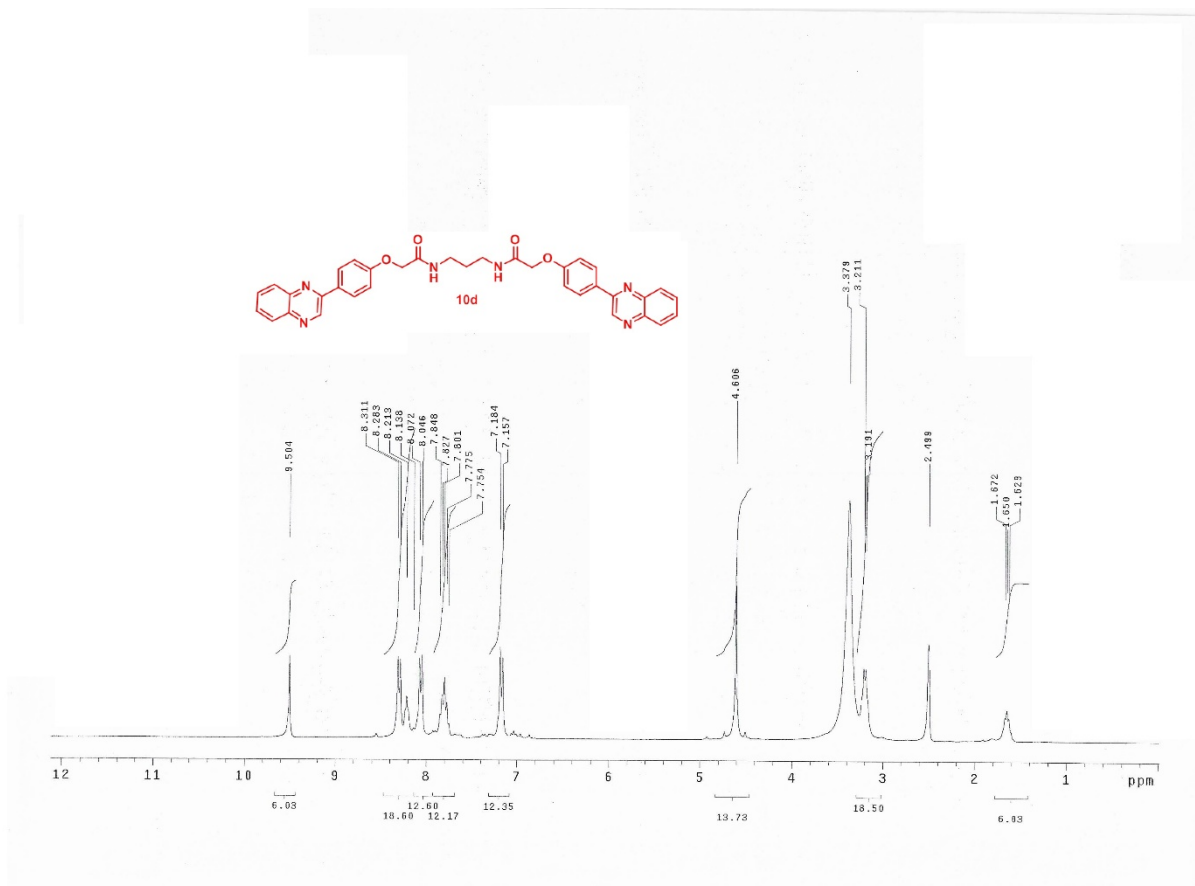

**<sup>1</sup>H NMR spectrum of 10d**

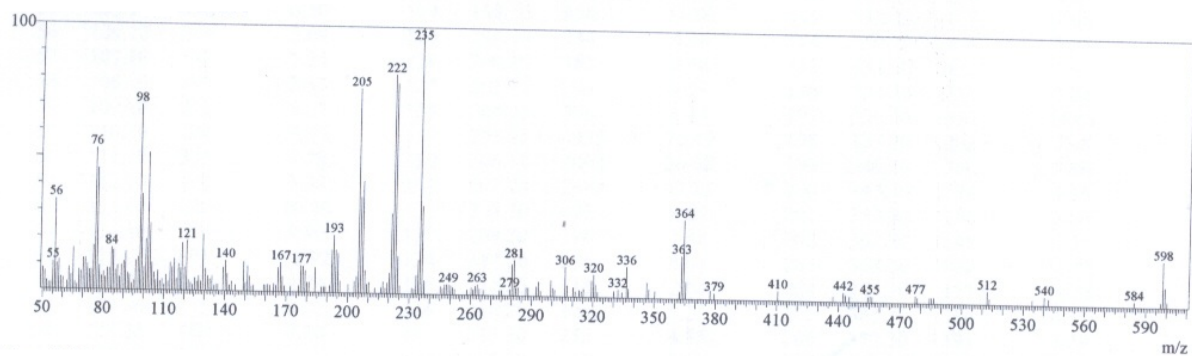

**Mass spectrum of 10d**

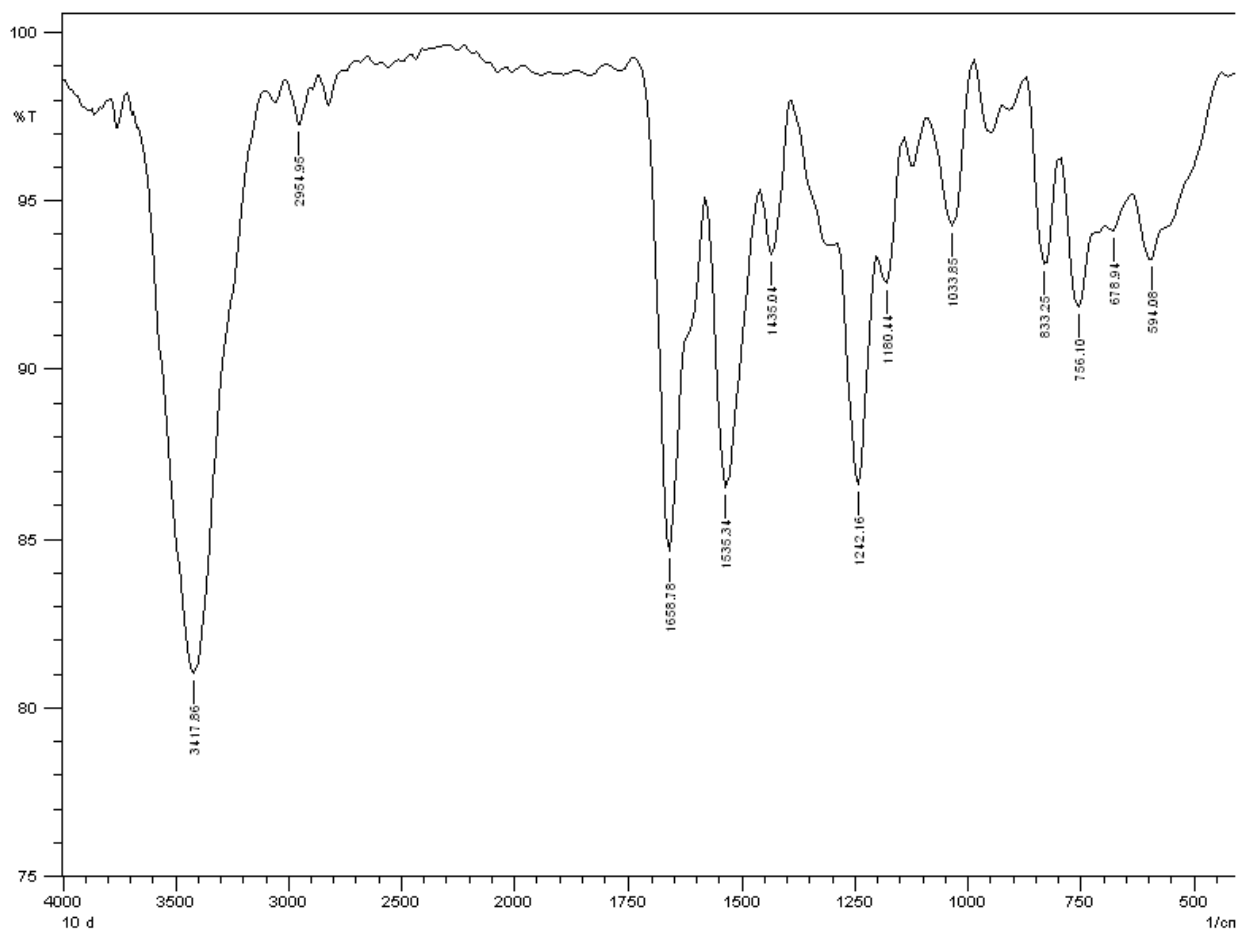

**IR spectrum of 10d**

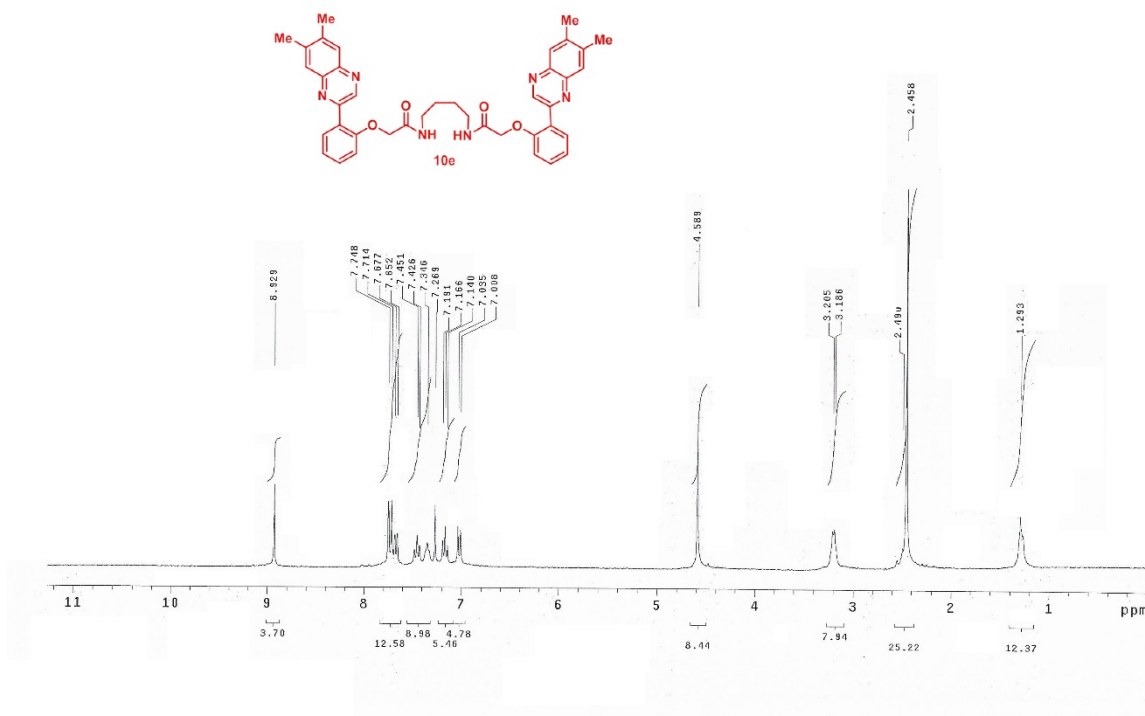

**<sup>1</sup>H NMR spectrum of 10e**

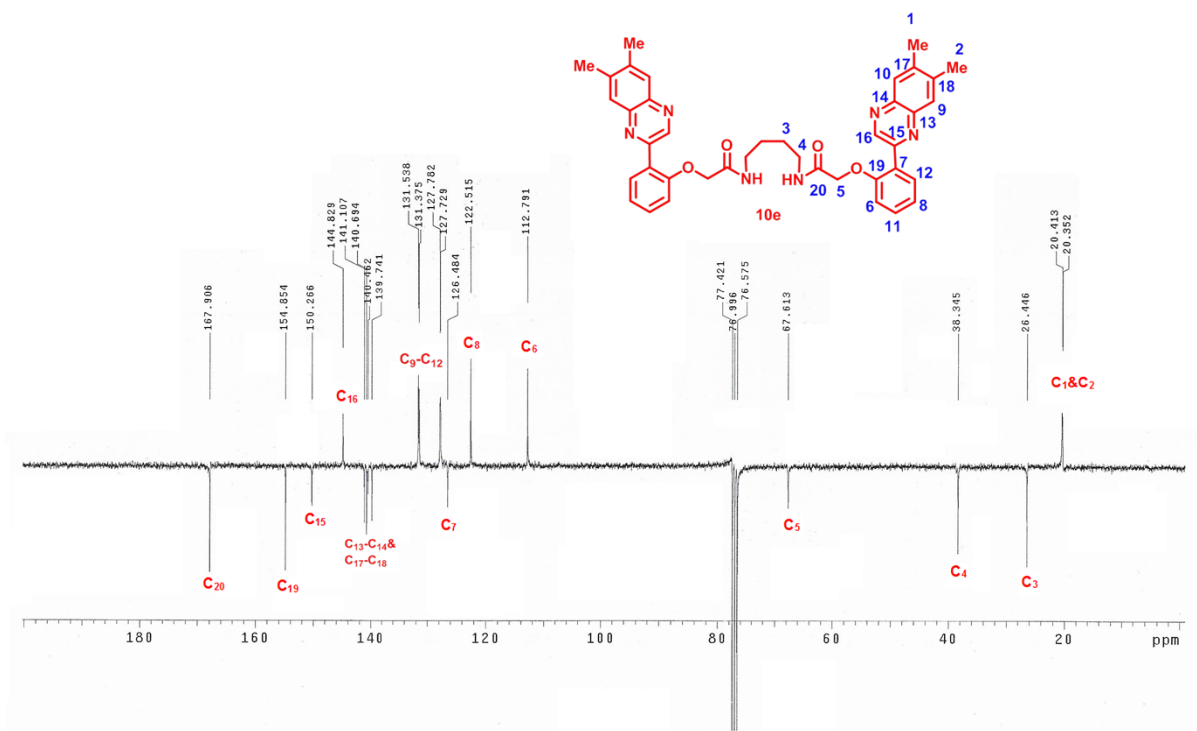

**<sup>13</sup>C NMR spectrum of 10e (APT)**

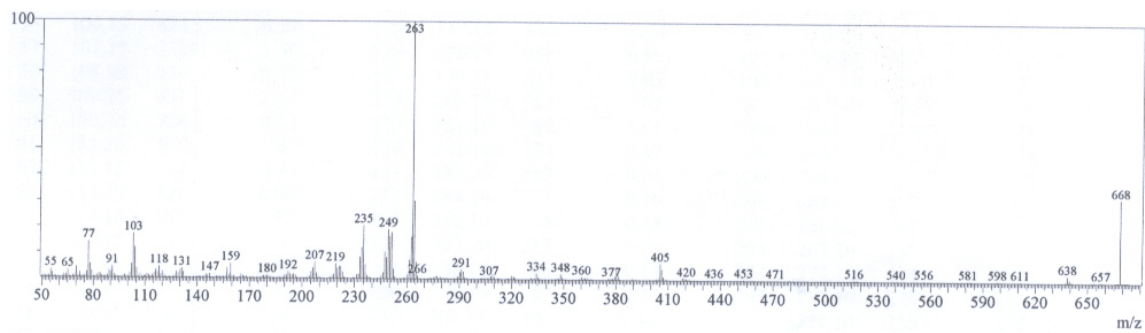

Mass spectrum of 10e

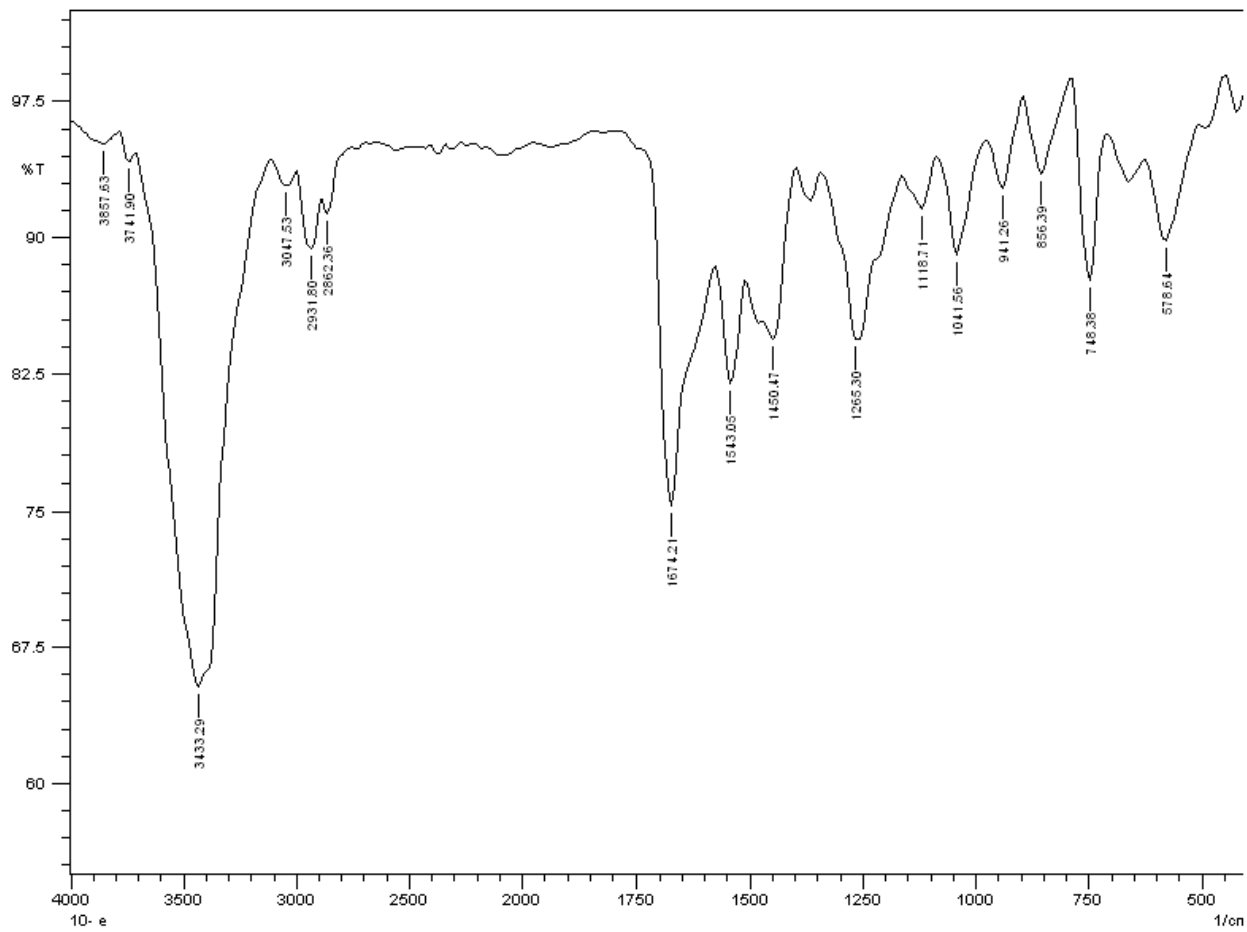

IR spectrum of 10e
